# Supplementary material for: Acylative kinetic resolution of racemic methyl-substituted cyclic alkylamines with 2,5-dioxopyrrolidin-1-yl (R)-2-phenoxypropanoate
Source: Royal Society of Chemistry journal article supplement (doi:10.1039/d1ob02099d), 2021-12-22
Supplement: d1ob02099d1.pdf [file d1ob02099d1.pdf]

## Supporting Information

### Acylative kinetic resolution of racemic methyl-substituted cyclic alkylamines with 2,5-dioxopyrrolidin-1-yl (*R*)-2-phenoxypropanoate

Dmitry A. Gruzdev, Sergey A. Vakarov, Marina A. Korolyova, Ekaterina V. Bartashevich,  
Andrey A. Tumashov, Evgeny N. Chulakov, Marina A. Ezhikova, Mikhail I. Kodess, Galina L. Levit  
and Victor P. Krasnov\*

#### Table of contents

|                                                                                        |      |
|----------------------------------------------------------------------------------------|------|
| <b>Experimental</b> .....                                                              | S-2  |
| General .....                                                                          | S-2  |
| Synthetic procedures and compound characterization .....                               | S-2  |
| <b>Determination of diastereoisomeric composition of amide 3a by chiral HPLC</b> ..... | S-7  |
| <b>Stereochemical results</b> .....                                                    | S-8  |
| <b>NMR spectra</b> .....                                                               | S-9  |
| <b>Selected GC and HPLC chromatograms</b> .....                                        | S-25 |
| <b>Computational details</b> .....                                                     | S-32 |
| <b>References</b> .....                                                                | S-61 |

## Experimental

**General:**  $^1\text{H}$  and  $^{13}\text{C}$  NMR spectra were recorded with a Bruker Avance 500 spectrometer (500 and 126 MHz, respectively) with TMS as internal standard. The  $^{13}\text{C}$  chemical shifts were referenced to the  $[\text{D}_6]\text{DMSO}$  or  $\text{CDCl}_3$  solvent signals ( $\delta_{\text{C}}$  39.5 or 77.0 ppm, respectively). The signals in the  $^1\text{H}$  and  $^{13}\text{C}$  NMR spectra were assigned based on 2D  $^1\text{H}$ - $^{13}\text{C}$  HSQC and HMBC experiments. Melting points were obtained with an SMP3 apparatus (Barloworld Scientific, UK). Optical rotations were measured with a Perkin–Elmer M341 polarimeter. Elemental analysis was performed by using a Perkin–Elmer 2400 II analyser. Analytical TLC was performed with Sorbfil plates (Imid, Russia). Flash column chromatography was performed on silica gel (230–400 mesh, Alfa Aesar, UK). The high-resolution mass spectra of compounds **1e**, (*R,R*)-**3e,f** and (*S*)-**4b,d-f** were obtained with a Bruker maXis Impact HD mass spectrometer (ESI). GC analysis of amide **3a** was performed by using a Shimadzu GC-2010 instrument with a ZB-5 capillary column (30 m  $\times$  0.25 mm  $\times$  0.25  $\mu\text{m}$ ):  $t_{(R^*,R^*)\text{-3a}} = 23.00$  min,  $t_{(R^*,S^*)\text{-3a}} = 23.16$  min. Determination of diastereoisomeric composition of amide **3a** was carried out with a Knauer Smartline-1100 instrument using a Chiralpak AS-H column (250  $\times$  4.6 mm), detection at 220 nm, 1 mL/min flow rate, *n*-hexane/*i*PrOH, 40:1 as an eluent. HPLC analysis of compounds **3b,c,e** and **4a-f** was carried out with a Knauer Smartline-1100 instrument using Chiralcel OD-H (**3b-e**, **4e,f**) or *S,S*-Whelk O1 (**4a-d**) columns (250  $\times$  4.6 mm), detection at 220 nm, 1 mL/min flow rate, *n*-hexane/*i*PrOH as an eluent. HPLC analysis of compounds **3d** and **3f** was carried out with an Agilent 1100 instrument using Kromasil 100-5 C18 and Phenomenex Luna C18(2) columns (250  $\times$  4.6 mm), respectively; detection at 220 nm, 1 mL/min flow rate, MeCN/ $\text{H}_2\text{O}$  as an eluent. Racemic acyl chloride **1a** has been described earlier.<sup>S1</sup> Racemic hexahydro-2-methyl-1*H*-azepine (**2d**)<sup>S2</sup> and 1-methyl-1,2,3,4-tetrahydroisoquinoline (**2f**)<sup>S3</sup> were obtained according to described procedures. Other reagents are commercially available. The solvents were purified according to traditional methods and used freshly distilled.

## Synthetic procedures and compound characterization

**General procedure for the synthesis of active esters 1b-e:** EDCl hydrochloride (1.21 g, 6.31 mmol) was added portion-wise to a solution of 2-phenoxypropanoic acid (1.02 g, 6.14 mmol), appropriate phenol or *N*-hydroxyimide (6.45 mmol), and DMAP (0.02 g, 0.16 mmol) in  $\text{CH}_2\text{Cl}_2$  (20 mL) under stirring at 0  $^\circ\text{C}$ . The reaction mixture was stirred for 24 h at room temperature, then successively washed with 1 M HCl (3  $\times$  10 mL), saturated aqueous NaCl solution (3  $\times$  20 mL), 10% aqueous  $\text{Na}_2\text{CO}_3$  (3  $\times$  10 mL), and water (3  $\times$  20 mL). Organic layer was separated, dried with  $\text{Na}_2\text{SO}_4$  and evaporated to dryness under reduced pressure. Esters (*RS*)-**1b** and (*RS*)-**1c** were purified by flash column chromatography on silica gel (*n*-hexane/EtOAc, from 95:5 to 9:1). Compound (*RS*)-**1d** was used without purification (NMR purity >96%). Analytical samples of esters **1b-e** were obtained after recrystallization from *n*-hexane/ $\text{CHCl}_3$ , 5:1.

**4-Nitrophenyl (*RS*)-2-phenoxypropanoate [(*RS*)-1b].** Yield 1.23 g (70%). Colourless viscous oil.  $^1\text{H}$  NMR ( $\text{CDCl}_3$ ):  $\delta = 8.25$  (d,  $J = 9.2$  Hz, 2H, H-3'), 7.33 (dd,  $J = 8.7, 7.4$  Hz, 2H, *Hm*), 7.21 (d,  $J = 9.2$  Hz, 2H, H-2'), 7.04 (tt,  $J = 7.4, 0.9$  Hz, 1H, *Hp*), 6.97 (dd,  $J = 8.7, 0.9$  Hz, 2H, *Ho*), 5.03 (q,  $J = 6.8$  Hz, 1H, H-2), 1.81 (d,  $J = 6.8$  Hz, 3H, *Me*) ppm.  $^{13}\text{C}$  NMR ( $\text{CDCl}_3$ ):  $\delta = 169.98$  (C=O), 157.26 (*Ci*), 154.86 (C-O), 145.56 (C-4'), 129.75 (2*Cm*), 125.23 (2C-3'), 122.18 (2C-2'), 122.16 (*Cp*), 115.14 (2*Co*), 72.51 (C-2), 18.45 (*Me*) ppm.  $\text{C}_{15}\text{H}_{13}\text{NO}_5$  (287.27): calcd. C 62.72, H 4.56, N 4.88; found C 62.73, H 4.53, N 4.69.

**2,3,4,5,6-Pentachlorophenyl (*RS*)-2-phenoxypropanoate [(*RS*)-1c].** Yield 1.63 g (64%). Colourless solid, m.p. 129–130  $^\circ\text{C}$  (*n*-hexane/ $\text{CHCl}_3$ ).  $^1\text{H}$  NMR ( $\text{CDCl}_3$ ):  $\delta = 7.31$  (t,  $J = 8.0$  Hz, 2H, *Hm*), 7.03–7.00 (m, 3H, *Ar*), 5.14 (q,  $J = 6.8$  Hz, 1H, H-2), 1.89 (d,  $J = 6.8$  Hz, 3H, *Me*) ppm.  $^{13}\text{C}$  NMR ( $\text{CDCl}_3$ ):  $\delta = 168.15$  (C=O), 157.15 (*Ci*), 143.39 (C-O), 132.13 (C-4'), 131.91 (2C-3'), 129.61 (2*Cm*), 127.51 (2C-2'), 122.19 (*Cp*), 115.30 (2*Co*), 72.14 (C-2), 18.77 (*Me*) ppm.  $\text{C}_{15}\text{H}_9\text{Cl}_5\text{O}_3$  (414.48): calcd. C 43.47, H 2.19, Cl 42.76; found C 43.72, H 2.33, Cl 42.54.

**2,5-Dioxopyrrolidin-1-yl (*RS*)-2-phenoxypropanoate [(*RS*)-1d].** Yield 1.60 g (99%). Colourless solid, m.p. 79–81  $^\circ\text{C}$  (*n*-hexane/ $\text{CHCl}_3$ ).  $^1\text{H}$  NMR ( $\text{CDCl}_3$ ):  $\delta = 7.31$  (t,  $J = 8.0$  Hz, 2H, *Hm*), 7.01 (t,  $J = 7.3$  Hz, 1H, *Hp*), 6.96 (d,  $J = 8.4$  Hz, 2H, *Ho*), 5.05 (q,  $J = 6.8$  Hz, 1H, 2-H), 2.81 (s, 4H,  $\text{CH}_2\text{CH}_2$ ), 1.81 (d,  $J = 6.8$  Hz, 3H, *Me*) ppm.  $^{13}\text{C}$  NMR ( $\text{CDCl}_3$ ):  $\delta = 168.58$  (C=O), 167.71 (C-2' and C-5'), 156.88 (*Ci*), 129.68 (2*Cm*), 122.28 (*Cp*), 115.26 (2*Co*), 70.77 (C-2), 25.53 (C-3' and C-4'), 18.83 (*Me*) ppm.  $\text{C}_{13}\text{H}_{13}\text{NO}_5$  (263.25): calcd. C 59.31, H 4.98, N 5.32; found C 59.14, H 4.81, N 5.36.

**2,5-Dioxopyrrolidin-1-yl (*R*)-2-phenoxypropanoate [(*R*)-1d].** Yield 1.23 g (76%). Colourless viscous oil.  $[\alpha]_D^{20} = +117$  ( $c = 1.0$ ,  $\text{CHCl}_3$ ). NMR spectra are identical to those of compound (*RS*)-1d.  $\text{C}_{13}\text{H}_{13}\text{NO}_5$  (263.25): calcd. C 59.31, H 4.98, N 5.32; found C 59.04, H 5.00, N 5.54.

**2,7-Dioxoisindol-1-yl (*RS*)-2-phenoxypropanoate [(*RS*)-1e].** Yield 1.24 g (65%). Colourless solid, m.p. 136–137 °C (*n*-hexane/ $\text{CHCl}_3$ ).  $^1\text{H}$  NMR ( $\text{CDCl}_3$ ):  $\delta = 7.90$ – $7.86$  (m, 2H, H-4', H-7'),  $7.80$ – $7.76$  (m, 2H, H-5', H-6'),  $7.34$  (dd,  $J = 8.5, 7.5$  Hz, 2H, Hm),  $7.04$  (t,  $J = 7.5$  Hz, 1H, Hp),  $7.01$  (d,  $J = 8.0$  Hz, 2H, Ho),  $5.12$  (q,  $J = 6.9$  Hz, 1H, H-2),  $1.87$  (d,  $J = 6.9$  Hz, 3H, Me) ppm.  $^{13}\text{C}$  NMR ( $\text{CDCl}_3$ ):  $\delta = 168.67$  (C=O),  $161.54$  (C-1', C-3'),  $156.94$  (Ci),  $134.84$  (C-5', C-6'),  $129.70$  (2Cm),  $128.81$  (C-3'a, C-7'a),  $124.03$  (C-4', C-7'),  $122.31$  (Cp),  $115.30$  (2Co),  $70.88$  (C-2),  $18.89$  (Me) ppm.  $\text{C}_{17}\text{H}_{13}\text{NO}_5$  (311.29): calcd. C 65.59, H 4.21, N 4.50; found C 65.32, H 3.99, N 4.58.

**General procedure for the acylation of racemic amine 2a with racemic esters 1a-e:** A solution of an appropriate acylating agent (0.5 mmol) in toluene (2.5 mL) was added to a solution of amine 2a (49.6 mg, 0.5 mmol) in toluene (2.5 mL) at +20 °C. The reaction mixture was kept in a thermostat at +20 °C for 24 h, then successively washed with 6 M HCl (2 × 3 mL), saturated aqueous NaCl solution (4 × 3 mL), 5% aqueous  $\text{NaHCO}_3$  solution (2 × 3 mL), and water (2 × 3 mL), dried with  $\text{Na}_2\text{SO}_4$  and evaporated to dryness under reduced pressure. The residue was analysed by GC.

**(*R\*,R\**)-2-Methyl-1-(2-phenoxypropanoyl)piperidine [(*R\*,R\**)-3a].** Yield 98 mg (79%), from ester (*RS*)-1d. Colourless oil. GC:  $t_{(R,R)\text{-3a}} = 23.00$  min,  $t_{(R,S)\text{-3a}} = 23.16$  min, (*R\*,R\**)/(*R\*,S\**) 93:7.  $^1\text{H}$  NMR ( $[\text{D}_6]\text{DMSO}$ , 100 °C) (predominant diastereomer):  $\delta = 7.24$  (dd,  $J = 8.6, 7.4$  Hz, 2H, Hm),  $6.91$  (t,  $J = 7.4$  Hz, 1H, Hp),  $6.85$  (dd,  $J = 8.6, 0.9$  Hz, 2H, Ho),  $5.07$  (q,  $J = 6.6$  Hz, 1H, H-2 propanoate),  $4.54$  (br. s, 1H, H-2'),  $4.03$  (br. d,  $J = 11.4$  Hz, 1H, H<sub>A</sub>-6'),  $2.92$  (m, 1H, H<sub>B</sub>-6', overlapped with H<sub>2</sub>O signal),  $1.65$ – $1.58$  (m, 2H, H<sub>A</sub>-4' and H<sub>A</sub>-5'),  $1.53$ – $1.46$  (m, 3H, H<sub>A</sub>-3', H<sub>B</sub>-3' and H<sub>B</sub>-4'),  $1.44$  (d,  $J = 6.6$  Hz, 3H, Me propanoate),  $1.25$  (tt,  $J = 13.1, 4.5$  Hz, 1H, H<sub>B</sub>-5'),  $1.11$  (d,  $J = 6.9$  Hz, 3H, Me) ppm.  $^{13}\text{C}$  NMR ( $[\text{D}_6]\text{DMSO}$ , 100 °C):  $\delta = 167.98$  (C=O),  $156.96$  (Ci),  $128.77$  (2Cm),  $120.41$  (Cp),  $114.69$  (2Co),  $71.67$  (C-2),  $44.85$  (br. s, C-2'),  $37.60$  (br. s, C-6'),  $29.35$  (C-3'),  $24.93$  (C-5'),  $17.74$  (C-4'),  $17.09$  (Me propanoate),  $15.24$  (br. s, Me) ppm.  $\text{C}_{15}\text{H}_{21}\text{NO}_2$  (247.34): calcd. C 72.84, H 8.56, N 5.66; found C 72.68, H 8.81, N 5.65.

**General procedure for the kinetic resolution of racemic amines 2a-f with ester (*R*)-1d:** A solution of ester (*R*)-1d (131.6 mg, 0.5 mmol) in toluene (5 mL) was added to a solution of an appropriate amine 2a-f (1.0 mmol) in toluene (5 mL) at –20 °C. The reaction mixture was kept in a thermostat at –20 °C for 24 h, then successively washed with 6 M HCl (2 × 4 mL), saturated aqueous NaCl solution (4 × 5 mL), 5% aqueous  $\text{NaHCO}_3$  solution (2 × 5 mL), and water (2 × 5 mL), dried with  $\text{Na}_2\text{SO}_4$  and evaporated to dryness under reduced pressure. The residue was analysed by GC or HPLC, then purified by recrystallisation or flash column chromatography on silica gel to afford amides (*R,R*)-3a-f. Acidic aqueous solutions were separated and alkalisated with NaOH to pH 11–12, then extracted with  $\text{CH}_2\text{Cl}_2$  (2 × 4 mL).

Combined organic layers were separated, dried with  $\text{Na}_2\text{SO}_4$  and evaporated to dryness under reduced pressure. The residue was re-dissolved in  $\text{CH}_2\text{Cl}_2$  (5 mL);  $\text{NEt}_3$  (73  $\mu\text{L}$ , 0.53 mmol) and benzoyl chloride (0.53 mmol) (for amines 2a,b) or carbobenzoxy chloride (0.53 mmol) (for amines 2c-f) were added at to the resulting solution room temperature. The reaction mixture was stirred at room temperature for 24 h, then successively washed with 1 M HCl (4 mL), saturated aqueous NaCl solution (3 × 5 mL), 5% aqueous  $\text{Na}_2\text{CO}_3$  solution (2 × 5 mL), and water (2 × 5 mL), dried with  $\text{Na}_2\text{SO}_4$  and evaporated to dryness under reduced pressure to afford crude compounds (*S*)-4a-f. The residue was purified by flash column chromatography and analysed by chiral HPLC.

**(*R,R*)-2-Methyl-1-(2-phenoxypropanoyl)piperidine [(*R,R*)-3a].** Yield 82 mg (66%) after flash column chromatography (benzene/EtOAc, 95:5). Colourless oil. GC:  $t_{(R,R)\text{-3a}} = 23.00$  min,  $t_{(R,S)\text{-3a}} = 23.16$  min; 94.8% *de*. NMR spectra are identical to those of compound (*R\*,R\**)-3a.  $\text{C}_{15}\text{H}_{21}\text{NO}_2$  (247.34): calcd. C 72.84, H 8.56, N 5.66; found C 72.64, H 8.76, N 5.95.

**(*S*)-1-Benzoyl-2-methylpiperidine [(*S*)-4a].** Yield 83 mg (41% relative to (*RS*)-2a, after flash column chromatography (benzene/EtOAc, 9:1). Colourless oil.  $[\alpha]_D^{20} = +21$  ( $c = 1.4$ ,  $\text{CHCl}_3$ ) [ref.<sup>54</sup>:  $[\alpha]_D^{20} = +32.9$  ( $c = 0.8$ ,  $\text{CHCl}_3$ )]. HPLC (*S,S*-Whelk O1, *n*-hexane/*i*PrOH, 5:1):  $t_{(R)\text{-4a}} = 31.6$  min,  $t_{(S)\text{-4a}} = 33.2$  min; 76.2% *ee*.  $^1\text{H}$  NMR ( $\text{CDCl}_3$ ) (conformers A and B, 1:1):  $\delta = 7.40$ – $7.35$  (m, 5H, Ph),  $5.33$ – $3.35$  (m, 2H, NCH<sub>2</sub>),  $2.99$  (br. s, 1H, H-2),  $1.91$ – $1.37$  (m, 6H, 3 × CH<sub>2</sub>),  $1.24$  (br. d,  $J = 6.2$  Hz, 3H, Me) ppm.  $^{13}\text{C}$  NMR ( $\text{CDCl}_3$ ) (conformers A and B):  $\delta = 170.40$  (C=O),  $137.02$  (Ci),  $129.07$  (Cp),  $128.38$  (2Cm),  $126.30$  (br. s, 2Co),  $49.98$  and  $44.38$  (both br. s, C-2),  $42.57$  and  $36.78$  (both br. s, C-6),  $30.36$  (C-3),  $25.99$  (C-5),  $18.83$  (C-4),  $16.08$  (br. s, Me) ppm.  $\text{C}_{13}\text{H}_{17}\text{NO}$

(203.29): calcd. C 76.81, H 8.43, N 6.89; found C 76.54, H 8.72, N 6.65.

**(R,R)-3-Methyl-1-(2-phenoxypropanoyl)piperidine [(R,R)-3b].** Yield 92 mg (74%) after flash column chromatography (benzene/EtOAc, 95:5). Colourless oil. HPLC (Chiralcel OD-H, *n*-hexane/*i*PrOH, 40:1):  $t_{(R,R)-3b} = 12.5$  min,  $t_{(R,S)-3b} = 14.4$  min; 13.8% *de*. Diastereomerically pure amide (*R,R*)-**3b** (33 mg, 72% yield) was isolated from 80 mg of (*R,R*)/(*R,S*) mixture, 56.9:43.1, as a fast-eluting diastereomer using preparative HPLC (Shimadzu LC-20 Prominence instrument, Chiralcel OD-H column (250 × 20 mm, 5 μm), detection at 220 nm, 10 mL/min flow rate, *n*-hexane/*i*PrOH, 40:1).  $[\alpha]_D^{20} = -56.0$  ( $c = 0.5$ , CHCl<sub>3</sub>). Analytical HPLC (Chiralcel OD-H, *n*-hexane/*i*PrOH, 40:1):  $t_{(R,R)-3b} = 13.1$  min; >99% *de*. <sup>1</sup>H NMR ([D<sub>6</sub>]DMSO, 100 °C): δ = 7.25 (dd,  $J = 8.7, 7.3$  Hz, 2H, *Hm*), 6.92 (tt,  $J = 7.3, 1.0$  Hz, 1H, *Hp*), 6.87 (dd,  $J = 8.7, 1.0$  Hz, 2H, *Ho*), 5.12 (q,  $J = 6.5$  Hz, 1H, H-2 propanoate), 4.09-3.90 (m, 2H, H<sub>2</sub>-6), 2.96-2.70 (br. m, 1H, H<sub>A</sub>-2, partially overlapped with H<sub>2</sub>O signal), 2.55 (br. s, 1H, H<sub>B</sub>-2), 1.73 (dq,  $J = 13.0, 4.1$  Hz, 1H, H<sub>A</sub>-4), 1.62 (dqw,  $J = 13.4, 3.8$  Hz, 1H, H<sub>A</sub>-5), 1.48 (br. s, 1H, H-3), 1.43 (d,  $J = 6.5$  Hz, 3H, Me propanoate), 1.30 (dtt,  $J = 13.4, 11.4, 4.1$  Hz, 1H, H<sub>B</sub>-5), 1.13 (dddd,  $J = 13.0, 11.4, 10.5, 3.8$  Hz, 1H, 1H, 4-H<sub>B</sub>), 0.81 (d,  $J = 6.6$  Hz, 3H, Me) ppm. <sup>13</sup>C NMR ([D<sub>6</sub>]DMSO, 100 °C): δ = 167.85 (C=O), 156.86 (*Ci*), 128.79 (2*Cm*), 120.44 (*Cp*), 114.73 (2*Co*), 71.33 (C-2), 49.9 (br. s, C-2'), 43.2 (br. s, C-6'), 31.83 (C-4'), 30.30 (br. s, C-3'), 24.18 (C-5'), 17.82 (Me), 16.91 (Me) ppm. C<sub>15</sub>H<sub>21</sub>NO<sub>2</sub> (247.34): calcd. C 72.84, H 8.56, N 5.66; found C 72.59, H 8.69, N 5.68.

**(S)-1-Benzoyl-3-methylpiperidine [(S)-4b].** Yield 83 mg (41% relative to (*RS*)-**2b**, after flash column chromatography (benzene/EtOAc, 9:1)). Colourless oil.  $[\alpha]_D^{20} = +6.8$  ( $c = 1.1$ , MeOH) [ref.<sup>55</sup>:  $[\alpha]_D^{20} = +49.5$  ( $c = 1.0$ , MeOH)]. HPLC (*S,S*-Whelk O1, *n*-hexane/*i*PrOH, 5:1):  $t_{(R)-4b} = 24.6$  min,  $t_{(S)-4b} = 27.8$  min; 13.6% *ee*. <sup>1</sup>H NMR (CDCl<sub>3</sub>) (conformers *A* and *B*, 55:45): δ = 7.41-7.36 (m, 5H, Ph), 4.54 (m, 1H, H<sub>A</sub>-6), 3.66 (d,  $J = 10.7$  Hz, 0.55H, H<sub>A</sub>-2 (*A*)), 3.59 (d,  $J = 11.2$  Hz, 0.45H, H<sub>A</sub>-2 (*B*)), 2.93 (br. t,  $J = 10.7$  Hz, 0.55H, H<sub>B</sub>-2 (*A*)), 2.81 (br. t,  $J = 11.5$  Hz, 0.45H, H<sub>B</sub>-2 (*B*)), 2.64 (br. t,  $J = 10.9$  Hz, 0.45H, H<sub>B</sub>-2 (*B*)), 2.44 (br. t,  $J = 11.1$  Hz, 0.55H, H<sub>B</sub>-6 (*A*)), 1.89-1.84 (m, 1H, H<sub>A</sub>-4), 1.79-1.41 (m, 3H, H-3, H<sub>2</sub>-5), 1.21-1.13 (m, 1H, H<sub>B</sub>-4), 0.97 (br. d,  $J = 5.7$  Hz, 1.65H, Me (*A*)), 0.79 (br. d,  $J = 5.5$  Hz, 1.35H, Me (*B*)) ppm. <sup>13</sup>C NMR (CDCl<sub>3</sub>) (conformers *A* and *B*, 55:45): δ = 170.25 (C=O), 136.54 (*Ci*), 129.31 (*Cp*), 128.37 (2*Cm*), 126.78 (br. s, 2*Co*), 55.09 (br. s, C-2 (*B*)), 49.44 (br. s, C-6 (*A*)), 48.22 (br. s, C-2 (*A*)), 42.63 (br. s, C-6 (*B*)), 33.10 (C-4), 31.88 (br. s, C-3 (*B*)), 31.05 (br. s, C-3 (*A*)), 26.00 (br. s, C-5 (*A*)), 24.77 (br. s, C-5 (*B*)), 19.10 (br. s, Me (*A*)), 18.74 (br. s, Me (*B*)) ppm. HRMS (ESI): calcd. for C<sub>13</sub>H<sub>18</sub>NO<sup>+</sup> [M + H]<sup>+</sup> 204.1383; found 204.1385.

**(R,R)-2-Methyl-1-(2-phenoxypropanoyl)pyrrolidine [(R,R)-3c].** Yield 51 mg (44%) after recrystallisation from *n*-hexane/EtOAc, 15:1. Colourless solid, m.p. 78–80 °C. HPLC (Chiralcel OD-H, *n*-hexane/*i*PrOH, 40:1):  $t_{(R,R)-3c} = 16.8$  min,  $t_{(R,S)-3c} = 20.2$  min; 29.2% *de*. <sup>1</sup>H NMR ([D<sub>6</sub>]DMSO, 100 °C): δ = 7.25 (dd,  $J = 8.6, 7.4$  Hz, 2H, *Hm*), 6.92 (t,  $J = 7.4$  Hz, 1H, *Hp*), 6.87-6.85 (m, 2H, *Ho*), 4.91 (br. q,  $J = 6.3$  Hz, 1H, H-2 propanoate), 4.07 (br. s, 1H, H-2), 3.62-3.39 (m, 2H, H<sub>2</sub>-5), 1.97-1.86 (m, 2H, H<sub>2</sub>-4), 1.82-1.76 (m, 1H, H<sub>A</sub>-3), 1.51 (m, 1H, H<sub>B</sub>-3), 1.42 (d,  $J = 6.3$  Hz, 1H, Me propanoate, *R,S*), 1.41 (d,  $J = 6.3$  Hz, 2H, Me propanoate, *R,R*), 1.10 (d,  $J = 6.3$  Hz, 2H, Me, *R,R*), 1.07 (br. m, 1H, Me, *R,S*) ppm. <sup>13</sup>C NMR ([D<sub>6</sub>]DMSO, 100 °C): δ = 167.79 (C=O, *R,S*), 167.70 (C=O, *R,R*), 156.94 (*Ci*), 128.79 (2*Cm*), 120.48 (*Cp*, *R,R*), 120.43 (*Cp*, *R,S*), 114.95 (*Co*, *R,R*), 114.81 (*Co*, *R,S*), 72.26 (C-2, *R,S*), 72.08 (C-2, *R,R*), 52.21 (C-2'), 44.96 (C-5'), 30.58 (br. s, CH<sub>2</sub>), 23.33 (br. s, CH<sub>2</sub>), 18.32 (br. s, Me), 16.36 (br. s, Me) ppm. C<sub>14</sub>H<sub>19</sub>NO<sub>2</sub> (233.31): calcd. C 72.07, H 8.21, N 6.00; found C 71.93, H 8.28, N 6.02.

**Benzyl (S)-2-methylpyrrolidine-1-carboxylate [(S)-4c].** Yield 57 mg (26% relative to (*RS*)-**2c**, after flash column chromatography (*n*-hexane/EtOAc, 9:1)). Colourless oil.  $[\alpha]_D^{20} = +5.3$  ( $c = 1.04$ , CHCl<sub>3</sub>) [ref.<sup>56</sup>:  $[\alpha]_D^{20} = -24.9$  ( $c = 2.02$ , CHCl<sub>3</sub>) for (*R*)-**4c**]. HPLC (*S,S*-Whelk O1, *n*-hexane/*i*PrOH, 10:1):  $t_{(S)-4c} = 19.5$  min,  $t_{(R)-4c} = 22.8$  min; 19.4% *ee*. <sup>1</sup>H NMR (CDCl<sub>3</sub>) (conformers *A* and *B*, 1:1): δ = 7.44-7.28 (m, 5H, Ph), 5.18-5.09 (m, 2H, OCH<sub>2</sub>), 3.97 (br. m, 1H, H-2), 3.45-3.36 (m, 2H, H<sub>2</sub>-5), 2.04-1.53 (m, 4H, H<sub>2</sub>-3 and H<sub>2</sub>-4), 1.22 (br. d,  $J = 5.7$  Hz, 1.5H, Me (*A*)), 1.16 (br. d,  $J = 5.7$  Hz, 1.5H, Me (*B*)) ppm. <sup>13</sup>C NMR (CDCl<sub>3</sub>) (conformers *A* and *B*): δ = 154.94 and 154.66 (C=O), 137.13 and 137.08 (*Ci*), 128.37 (2*Cm*), 127.74 (2*Co* and *Cp*), 66.55 and 66.32 (OCH<sub>2</sub>), 53.41 and 52.80 (C-2), 46.60 and 46.21 (C-5), 33.22 and 32.50 (C-3), 23.60 and 22.86 (C-4), 20.81 and 19.95 (Me) ppm. HRMS (ESI): calcd. for C<sub>13</sub>H<sub>18</sub>NO<sub>2</sub><sup>+</sup> [M + H]<sup>+</sup> 220.1332; found 220.1333.

**(R,R)-2-Methyl-1-(2-phenoxypropanoyl)azepane [(R,R)-3d].** Yield 60 mg (46%) after flash column chromatography (benzene/EtOAc, 95:5). Colourless oil. HPLC (Kromasil 100-5 C18, MeCN/H<sub>2</sub>O, 55:45):  $t_{(R,S)-3d} = 12.6$  min,  $t_{(R,R)-3d} = 14.1$  min; 82.9% *de*. <sup>1</sup>H NMR ([D<sub>6</sub>]DMSO, 100 °C) (predominant diastereomer, conformers *A* and *B*, 55:45): δ = 7.25 (dd,  $J = 8.6, 7.4$  Hz, 2H, *Hm*), 6.93 (t,  $J = 7.4$  Hz, 1H, *Hp*), 6.91-6.87 (br. m, 2H, *Ho*), 5.10 (br. m, 1H, H-2 propanoate), 4.29 (br. s, 0.45H, CH (*B*)), 4.11 (br. s, 0.55H, CH (*A*)), 3.84 (br. s, 0.55H, CH

(A)), 3.76 (br. s, 0.45H, CH (B)), 3.09 (br. s, 0.45H, CH (B)), 2.71 (br. s, 0.55H, CH (A)), 1.96 (br. s, 1H, CH), 1.75-1.56 (m, 3H, 3 CH), 1.44 (d,  $J = 6.4$  Hz, 3H, Me propanoate), 1.42-1.12 (m, 4H, 4 CH), 1.04 (br. s, 3H, Me) ppm.  $^{13}\text{C}$  NMR ( $[\text{D}_6]\text{DMSO}$ , 100 °C) (predominant diastereomer, conformers A and B):  $\delta = 169.03$  (C=O (A)), 168.63 (C=O (B)), 156.94 (Ci), 128.81 (2Cm), 120.63 (Cp), 115.19 (br. s, 2Co), 71.29 (C-2), 50.06 (br. s, C-2' (A)), 49.93 (C-2' (B)), 40.4 (br. s, C-7', overlapped with DMSO signal), 35.48 (A), 33.77 (B), 29.60 (A), 28.43 (B), 27.57 (A), 26.65 (B), 24.24 (A), 23.69 (B), 20.03 (A), 18.10 (B), 17.17 (Me) ppm.  $\text{C}_{16}\text{H}_{23}\text{NO}_2$  (261.37): calcd. C 73.53, H 8.87, N 5.36; found C 73.23, H 8.89, N 5.41.

**Benzyl (S)-2-methylazepane-1-carboxylate [(S)-4d].** Yield 82 mg (33% relative to (RS)-2d, after flash column chromatography (*n*-hexane/EtOAc, 9:1)). Yellowish oil.  $[\alpha]_{\text{D}}^{20} = +33.5$  ( $c = 1.05$ ,  $\text{CHCl}_3$ ) [ref.<sup>57</sup>:  $[\alpha]_{\text{D}}^{20} = -44.9$  ( $c = 1.0$ ,  $\text{CHCl}_3$ ) for (R)-4d]. HPLC (S,S-Whelk O1, *n*-hexane/*i*PrOH, 10:1):  $t_{(\text{S})-4\text{d}} = 13.5$  min,  $t_{(\text{R})-4\text{d}} = 17.3$  min; 46.6% ee.  $^1\text{H}$  NMR ( $\text{CDCl}_3$ ) (conformers A and B, 55:45):  $\delta = 7.36$ -7.28 (m, 5H, Ph), 5.18-5.12 (m, 2H,  $\text{CH}_2\text{O}$ ), 4.18 (ddq,  $J = 9.3, 9.0, 6.5$  Hz, 0.55H, H-2 (A)), 4.08 (ddq,  $J = 12.2, 6.5, 6.0$  Hz, 0.45H, 2-H (B)), 3.83 (dm,  $J = 14.3, 0.45\text{H}$ ,  $\text{H}_{\text{A}-7}$  (B)), 3.3 (dm,  $J = 14.6, 0.55\text{H}$ ,  $\text{H}_{\text{A}-7}$  (A)), 2.78 (ddd,  $J = 14.6, 4.5, 1.5$  Hz, 0.55H,  $\text{H}_{\text{B}-7}$  (A)), 2.75 (ddd,  $J = 14.3, 4.6, 1.3$  Hz, 0.45H,  $\text{H}_{\text{B}-7}$  (B)), 2.04-1.92 (m, 1H, CH), 1.83-1.67 (m, 3H, 3 CH), 1.57-1.43 (m, 1H, CH), 1.31-1.17 (m, 3H, 3 CH), 1.08 (d,  $J = 6.5$  Hz, 1.65H, Me (A)), 1.07 (d,  $J = 6.5$  Hz, 1.35H, Me (B)) ppm.  $^{13}\text{C}$  NMR ( $\text{CDCl}_3$ ) (conformers A and B):  $\delta = 156.11$  (C=O (A)), 156.08 (C=O (B)), 137.28 (Ci), 128.39 (2Cm), 127.72 (Cp (A)), 127.70 (Cp (B)), 127.58 (2Co), 66.69 ( $\text{OCH}_2$  (B)), 66.63 ( $\text{OCH}_2$  (A)), 51.72 (C-2 (A)), 51.62 (C-2 (B)), 41.39 (C-7 (B)), 40.95 (C-7 (A)), 36.15 (C-3 (B)), 35.95 (C-3 (A)), 29.73 (C-6 (B)), 29.67 (C-6 (A)), 29.57 (C-5 (A)), 29.06 (C-5 (B)), 25.47 (C-4 (B)), 25.24 (C-4 (A)), 20.28 (Me (B)), 19.71 (Me (A)) ppm. HRMS (ESI): calcd. for  $\text{C}_{15}\text{H}_{22}\text{NO}_2^+$   $[\text{M} + \text{H}]^+$  248.1645; found 248.1643.

**(R,R)-3-Methyl-4-(2-phenoxypropanoyl)morpholine [(R,R)-3e].** Yield 82 mg (66%) after flash column chromatography (benzene/EtOAc, 95:5). Colourless oil. HPLC (Chiralcel OD-H, *n*-hexane/*i*PrOH, 40:1):  $t_{(\text{R,R})-3\text{e}} = 20.8$  min,  $t_{(\text{R,S})-3\text{e}} = 30.9$  min; 79.2% de.  $^1\text{H}$  NMR ( $[\text{D}_6]\text{DMSO}$ , 100 °C) (predominant diastereomer):  $\delta = 7.26$  (dd,  $J = 8.6, 7.4$  Hz, 2H, Hm), 6.93 (t,  $J = 7.4$  Hz, 1H, Hp), 6.87 (br. d,  $J = 8.6$  Hz, 2H, Ho), 5.09 (q,  $J = 6.5$  Hz, 1H, H-2 propanoate), 4.29 (m, 1H, H-3), 3.88 (m, 1H, CH), 3.79-3.78 (m, 1H, CH), 3.58 (d,  $J = 11.5$  Hz, 1H,  $\text{H}_{\text{A}-2}$ ), 3.41 (dd,  $J = 11.5, 3.2$  Hz, 1H,  $\text{H}_{\text{B}-2}$ ), 3.28-3.22 (m, 2H,  $\text{CH}_2$ ), 1.45 (d,  $J = 6.5$  Hz, 3H, Me propanoate), 1.18 (d,  $J = 6.8$  Hz, 3H, Me) ppm.  $^{13}\text{C}$  NMR ( $[\text{D}_6]\text{DMSO}$ , 100 °C):  $\delta = 168.23$  (C=O), 156.74 (Ci), 128.85 (2Cm), 120.61 (Cp), 114.82 (2Co), 71.36 (C-2), 69.73 (C-2'), 65.76 (C-6'), 45.4 (br. s, C-3'), 38.3 (br. s, C-5'), 17.52 (Me propanoate), 16.95 (Me) ppm. HRMS (ESI): calcd. for  $\text{C}_{14}\text{H}_{20}\text{NO}_3^+$   $[\text{M} + \text{H}]^+$  250.1438; found 250.1436.

**Benzyl (S)-3-methylmorpholine-4-carboxylate [(S)-4e].** Yield 59 mg (25% relative to (RS)-2e, after flash column chromatography (*n*-hexane/EtOAc, 9:1)). Yellowish oil.  $[\alpha]_{\text{D}}^{20} = +37.6$  ( $c = 1.05$ ,  $\text{CHCl}_3$ ) [ref.<sup>58</sup>:  $[\alpha]_{\text{D}}^{20} = -10.5$  ( $c = 0.8$ ,  $\text{CHCl}_3$ ) for (R)-4e (52% ee)]. HPLC (Chiralcel OD-H, *n*-hexane/*i*PrOH/MeOH, 40:0.4:0.1):  $t_{(\text{R})-4\text{e}} = 19.3$  min,  $t_{(\text{S})-4\text{e}} = 20.1$  min; 53.2% ee.  $^1\text{H}$  NMR ( $\text{CDCl}_3$ ):  $\delta = 7.38$ -7.30 (m, 5H, Ph), 5.16 (d,  $J = 12.4$  Hz, 1H,  $\text{OCH}_{\text{A}}$ ), 5.13 (d,  $J = 12.4$  Hz, 1H,  $\text{OCH}_{\text{B}}$ ), 4.14 (m, 1H, H-3), 3.85 (dd,  $J = 11.4, 3.5$  Hz, 1H,  $\text{H}_{\text{A}-2}$ ), 3.77 (dd,  $J = 13.2, 2.2$  Hz, 1H,  $\text{H}_{\text{A}-5}$ ), 3.65 (d,  $J = 11.6$  Hz, 1H,  $\text{H}_{\text{A}-6}$ ), 3.60 (dd,  $J = 11.4, 3.2$  Hz, 1H,  $\text{H}_{\text{B}-2}$ ), 3.44 (ddd,  $J = 12.4, 11.6, 3.1$  Hz, 1H,  $\text{H}_{\text{B}-6}$ ), 3.24 (ddd,  $J = 13.2, 12.4, 3.8$  Hz, 1H,  $\text{H}_{\text{B}-5}$ ), 1.28 (d,  $J = 6.9$  Hz, 3H, Me) ppm.  $^{13}\text{C}$  NMR ( $\text{CDCl}_3$ ):  $\delta = 155.14$  (C=O), 136.60 (Ci), 128.48 (2Cm), 128.02 (Cp), 127.84 (2Co), 70.75 (C-2), 67.12 ( $\text{OCH}_2$ ), 66.77 (C-6), 47.12 (C-3), 39.14 (C-5), 14.88 (Me) ppm. HRMS (ESI): calcd. for  $\text{C}_{13}\text{H}_{18}\text{NO}_3^+$   $[\text{M} + \text{H}]^+$  236.1281; found 236.1279.

**(R,R)-1-Methyl-2-(2-phenoxypropanoyl)-1,2,3,4-tetrahydroisoquinoline [(R,R)-3f].** Yield 102 mg (69%) after flash column chromatography (benzene/EtOAc, 95:5). Colourless oil. HPLC (Phenomenex Luna C18(2), MeCN/ $\text{H}_2\text{O}$ , 48:52):  $t_{(\text{R,S})-3\text{f}} = 28.2$  min,  $t_{(\text{R,R})-3\text{f}} = 29.9$  min; 82.0% de.  $^1\text{H}$  NMR ( $[\text{D}_6]\text{DMSO}$ , 100 °C) (predominant diastereomer):  $\delta = 7.27$ -7.08 (m, 6H, Ar), 6.94-6.83 (m, 3H, Ar), 5.41 (q,  $J = 6.5$  Hz, 1H, H-1'), 5.18 (q,  $J = 6.7$  Hz, 1H, H-2 propanoate), 4.19 (br. s, 1H,  $\text{H}_{\text{A}-3}$ ), 3.45 (br. s,  $\text{H}_{\text{B}-3}$ ), 2.80-2.73 (m, 2H,  $\text{H}_2-4$ ), 1.48 (d,  $J = 6.7$  Hz, 3H, Me propanoate), 1.38 (br. d,  $J = 6.5$  Hz, 3H, Me) ppm.  $^{13}\text{C}$  NMR ( $[\text{D}_6]\text{DMSO}$ , 100 °C) (predominant diastereomer):  $\delta = 168.27$  (C=O), 156.89 (Ci), 137.63 (C-8'a), 132.87 (C-4'a), 128.83 (2Cm), 127.97 (C-5'), 126.17 (C-7'), 125.72 (C-6'), 125.55 (C-8'), 120.58 (Cp), 114.80 (2Co), 71.85 (C-2), 48.57 (br. s, C-1'), 47.89 (br. s, C-3'), 28.28 (br. s, C-4'), 21.05 (br. s, Me), 17.12 (Me propanoate) ppm. HRMS (ESI): calcd. for  $\text{C}_{19}\text{H}_{22}\text{NO}_2^+$   $[\text{M} + \text{H}]^+$  296.1645; found 296.1645.

**Benzyl (S)-1-methyl-3,4-dihydroisoquinoline-2(1H)-carboxylate [(S)-4f].** Yield 107 mg (38% relative to (RS)-2f, after flash column chromatography (benzene/EtOAc, 95:5)). Colourless oil.  $[\alpha]_{\text{D}}^{20} = +50.0$  ( $c = 0.93$ ,  $\text{CHCl}_3$ ) [ref.<sup>58</sup>:  $[\alpha]_{\text{D}}^{20} = -40.6$  ( $c = 1.9$ ,  $\text{CHCl}_3$ ) for (R)-4f (86% ee)]. HPLC (Chiralcel OD-H, *n*-hexane/*i*PrOH, 40:1):  $t_{(\text{S})-4\text{f}} =$

14.9 min,  $t_{(R)-4f} = 18.8$  min; 55.0% *ee*.  $^1\text{H}$  NMR ( $\text{CDCl}_3$ ) (conformers *A* and *B*, 1:1):  $\delta = 7.40\text{-}7.29$  (m, 5H, Ar), 7.20-7.08 (m, 4H, Ar), 5.33-5.12 (m, 3H, H-1 and  $\text{OCH}_2$ ), 4.26 (br. d,  $J = 11.6$  Hz, 0.5H,  $\text{H}_{\text{A}-3}$  (*A*)), 4.10 (br. d,  $J = 12.3$  Hz, 0.5H,  $\text{H}_{\text{A}-3}$  (*B*)), 3.38-3.32 (m, 0.5H,  $\text{H}_{\text{B}-3}$  (*B*)), 3.28-3.22 (m, 0.5H,  $\text{H}_{\text{B}-3}$  (*A*)), 2.99-2.87 (m, 1H,  $\text{H}_{\text{A}-4}$ ), 2.77-2.72 (m, 1H,  $\text{H}_{\text{B}-4}$ ), 1.48-1.45 (m, 3H, Me) ppm.  $^{13}\text{C}$  NMR ( $\text{CDCl}_3$ ) (conformers *A* and *B*):  $\delta = 155.17$  and 154.90 (C=O), 138.58 and 138.14 (C-8a), 136.85 (Ci), 133.98 and 133.68 (C-4a), 128.95 and 128.69 (C-5), 128.48 (2Cm), 127.95 (Cp), 127.87 (br. s, 2Co), 126.91 and 126.78 (C-6), 126.38 (br. s, C-7), 126.27 and 126.20 (C-8), 67.13 and 66.99 ( $\text{OCH}_2$ ), 50.54 and 50.47 (C-1), 37.95 and 37.45 (C-3), 28.97 and 28.80 (C-4), 22.39 and 21.92 (Me) ppm. HRMS (ESI): calcd. for  $\text{C}_{18}\text{H}_{19}\text{NNaO}_2^+$  [ $\text{M} + \text{Na}$ ] $^+$  304.1308; found 304.1305.

## Determination of diastereoisomeric composition of amide **3a** by chiral HPLC

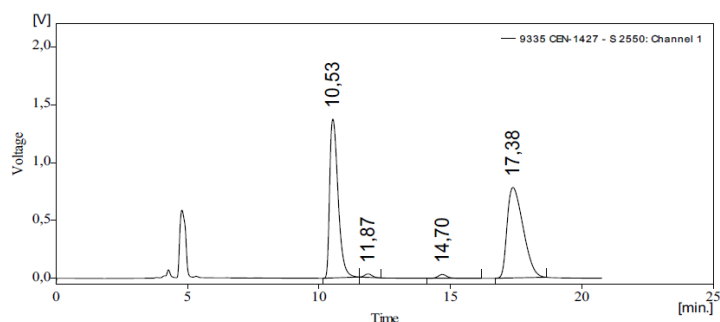

Result Table (Uncal - 9335 CEN-1427 - S 2550: Channel 1)

|       | Reten. Time [min] | Area [mAU.s] | Height [mAU] | Area [%] | Height [%] | W05 [min] |
|-------|-------------------|--------------|--------------|----------|------------|-----------|
| 1     | 10,533            | 30424,771    | 1372,029     | 47,0     | 61,9       | 0,37      |
| 2     | 11,867            | 586,362      | 29,474       | 0,9      | 1,3        | 0,33      |
| 3     | 14,700            | 763,227      | 32,912       | 1,2      | 1,5        | 0,37      |
| 4     | 17,383            | 32979,201    | 781,700      | 50,9     | 35,3       | 0,70      |
| Total |                   | 64753,560    | 2216,115     | 100,0    | 100,0      |           |

HPLC of a diastereoisomeric mixture **3a** (Knauer Smartline-1100, Chiralpak AS-H column (250 × 4.6 mm), detection at 220 nm, 1 mL/min flow rate, *n*-hexane/*i*PrOH, 40:1):

$t_{(R,R)\text{-3a}} = 10.5 \text{ min}$ ,  $t_{(R,S)\text{-3a}} = 11.9 \text{ min}$ ,  $t_{(S,R)\text{-3a}} = 14.7 \text{ min}$ ,  $t_{(S,S)\text{-3a}} = 17.4 \text{ min}$

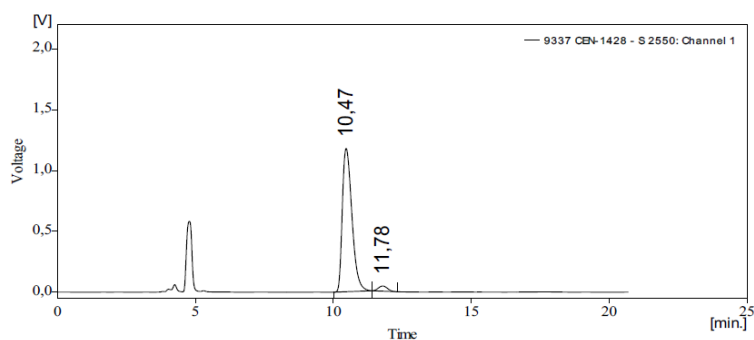

Result Table (Uncal - 9337 CEN-1428 - S 2550: Channel 1)

|       | Reten. Time [min] | Area [mAU.s] | Height [mAU] | Area [%] | Height [%] | W05 [min] |
|-------|-------------------|--------------|--------------|----------|------------|-----------|
| 1     | 10,467            | 28512,545    | 1178,795     | 96,7     | 96,5       | 0,40      |
| 2     | 11,783            | 980,395      | 42,545       | 3,3      | 3,5        | 0,38      |
| Total |                   | 29492,940    | 1221,339     | 100,0    | 100,0      |           |

HPLC of amide (*R,R*)-**3a** (Knauer Smartline-1100, Chiralpak AS-H column (250 × 4.6 mm), detection at 220 nm, 1 mL/min flow rate, *n*-hexane/*i*PrOH, 40:1):

$t_{(R,R)\text{-3a}} = 10.5 \text{ min}$ ,  $t_{(R,S)\text{-3a}} = 11.8 \text{ min}$  (93.4% *de*)

## Stereochemical results

**Table S1** Stereochemical results of KR of racemic amines (*RS*)-**2a-f** with enantiopure ester (*R*)-**1d** in toluene at  $-40\text{ }^{\circ}\text{C}$

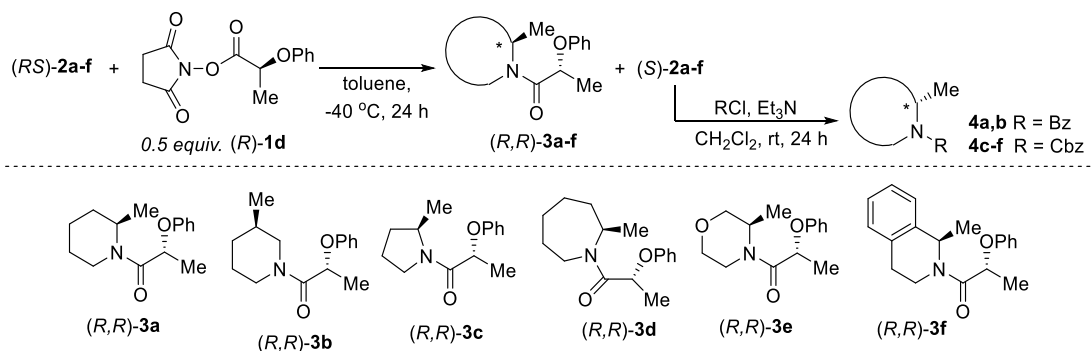

| Racemic amine           | <i>(R,R)</i> -Amide        |                              | Unreacted ( <i>S</i> )-amine |                              | Conversion <i>C</i> [%] <sup>c</sup> | Selectivity factor <i>s</i> <sup>d</sup> |
|-------------------------|----------------------------|------------------------------|------------------------------|------------------------------|--------------------------------------|------------------------------------------|
|                         | <i>de</i> [%] <sup>a</sup> | <i>de</i> <sub>AVG</sub> [%] | <i>ee</i> [%] <sup>b</sup>   | <i>ee</i> <sub>AVG</sub> [%] |                                      |                                          |
| <i>(RS)</i> - <b>2a</b> | <b>3a</b> , 94.4           | <b>3a</b> , 93.7             | <b>2a</b> , 73.8             | <b>2a</b> , 75.4             | 44                                   | 73                                       |
|                         | <b>3a</b> , 94.8           |                              | <b>2a</b> , 76.2             |                              |                                      |                                          |
|                         | <b>3a</b> , 92.0           |                              | <b>2a</b> , 76.2             |                              |                                      |                                          |
| <i>(RS)</i> - <b>2b</b> | <b>3b</b> , 16.0           | <b>3b</b> , 15.7             | <b>2b</b> , 15.2             | <b>2b</b> , 15.4             | 49                                   | 1.6                                      |
|                         | <b>3b</b> , 17.4           |                              | <b>2b</b> , 17.4             |                              |                                      |                                          |
|                         | <b>3b</b> , 13.8           |                              | <b>2b</b> , 13.6             |                              |                                      |                                          |
| <i>(RS)</i> - <b>2c</b> | <b>3c</b> , 29.2           | <b>3c</b> , 28.8             | <b>2c</b> , 19.4             | <b>2c</b> , 20.2             | 41                                   | 2.2                                      |
|                         | <b>3c</b> , 28.4           |                              | <b>2c</b> , 21.0             |                              |                                      |                                          |
| <i>(RS)</i> - <b>2d</b> | <b>3d</b> , 83.0           | <b>3d</b> , 83.0             | <b>2d</b> , 49.6             | <b>2d</b> , 48.1             | 37                                   | 17                                       |
|                         | <b>3d</b> , 82.9           |                              | <b>2d</b> , 46.6             |                              |                                      |                                          |
| <i>(RS)</i> - <b>2e</b> | <b>3e</b> , 77.8           | <b>3e</b> , 78.5             | <b>2e</b> , 57.8             | <b>2e</b> , 55.5             | 41                                   | 14                                       |
|                         | <b>3e</b> , 79.2           |                              | <b>2e</b> , 53.2             |                              |                                      |                                          |
| <i>(RS)</i> - <b>2f</b> | <b>3f</b> , 82.4           | <b>3f</b> , 82.2             | <b>2f</b> , 55.4             | <b>2f</b> , 55.2             | 40                                   | 18                                       |
|                         | <b>3f</b> , 82.0           |                              | <b>2f</b> , 55.0             |                              |                                      |                                          |

<sup>a</sup> Determined by GC or chiral HPLC. <sup>b</sup> Determined by chiral HPLC after precolumn derivatization to compounds **4a-f**. <sup>c</sup>  $C = [ee_{\text{amine}} / (ee_{\text{amine}} + de_{\text{amide}})] \times 100\%$ .<sup>59</sup> <sup>d</sup>  $s = \ln[(1 - C) \times (1 - ee_{\text{amine}})] / \ln[(1 - C) \times (1 + ee_{\text{amine}})]$ .<sup>59</sup>



# NMR spectra

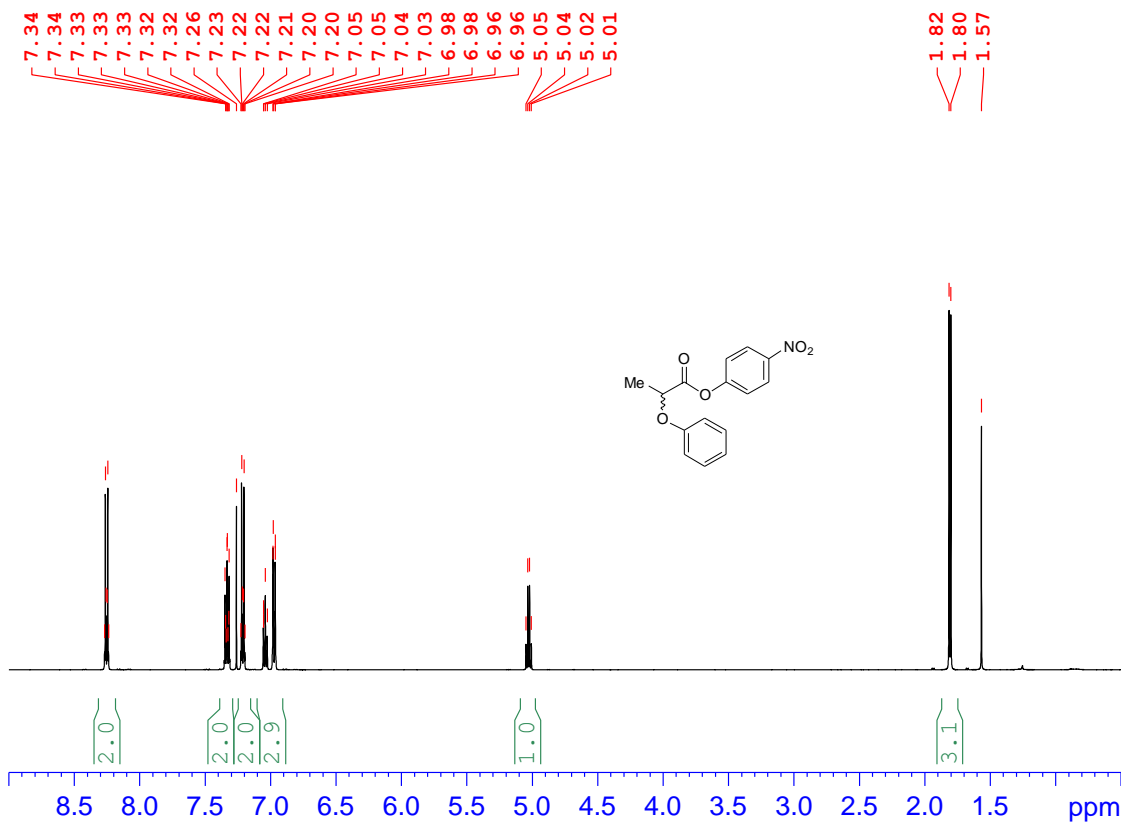

<sup>1</sup>H NMR (500 MHz, CDCl<sub>3</sub>) of ester (*RS*)-**1b**.

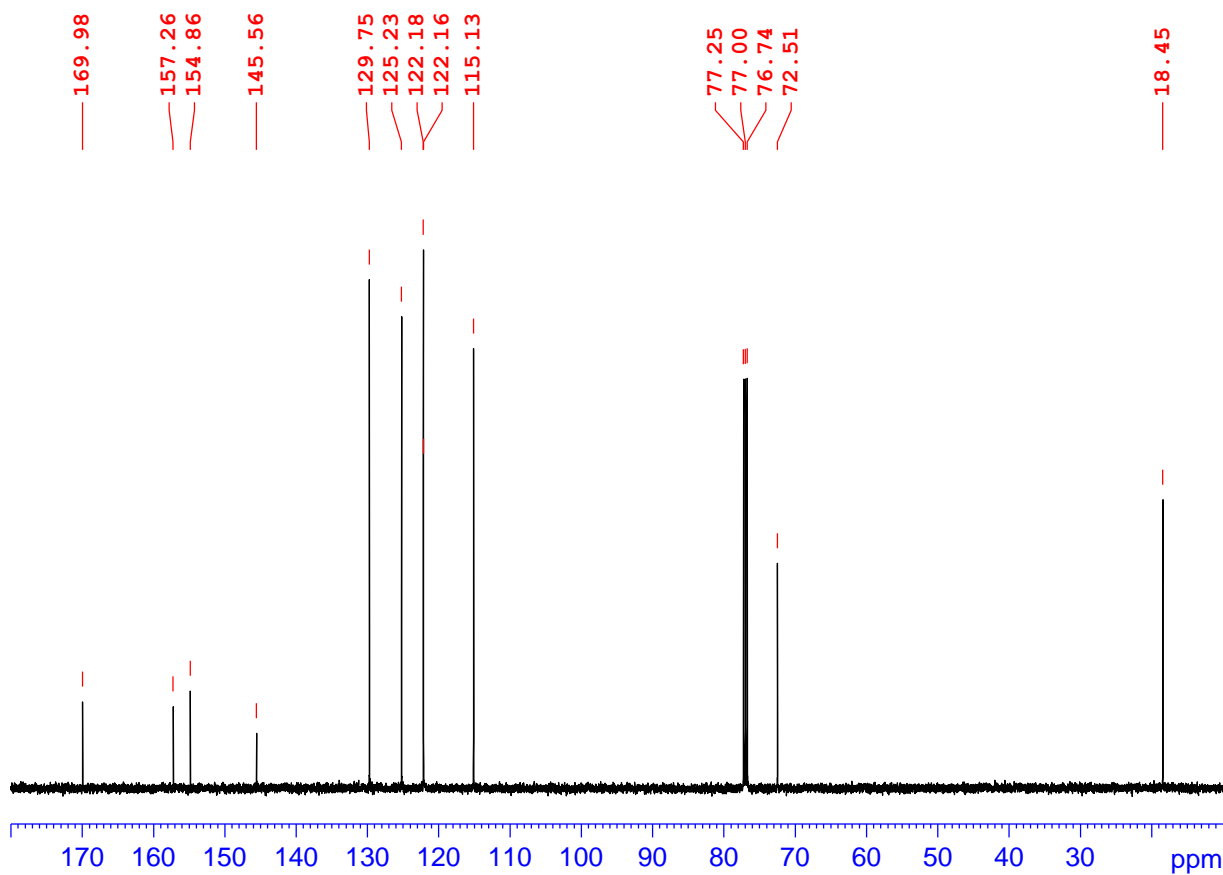

<sup>13</sup>C NMR (126 MHz, CDCl<sub>3</sub>) of ester (*RS*)-**1b**.

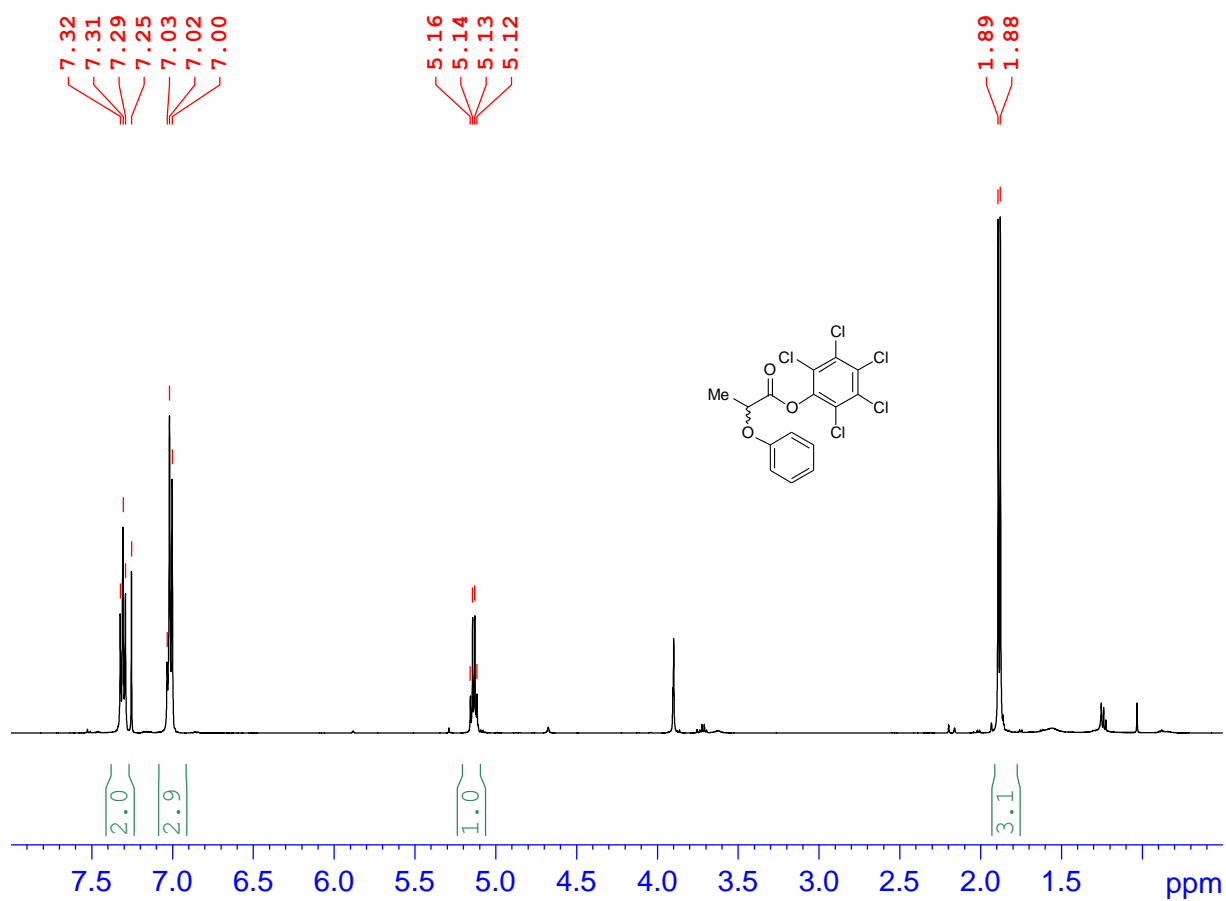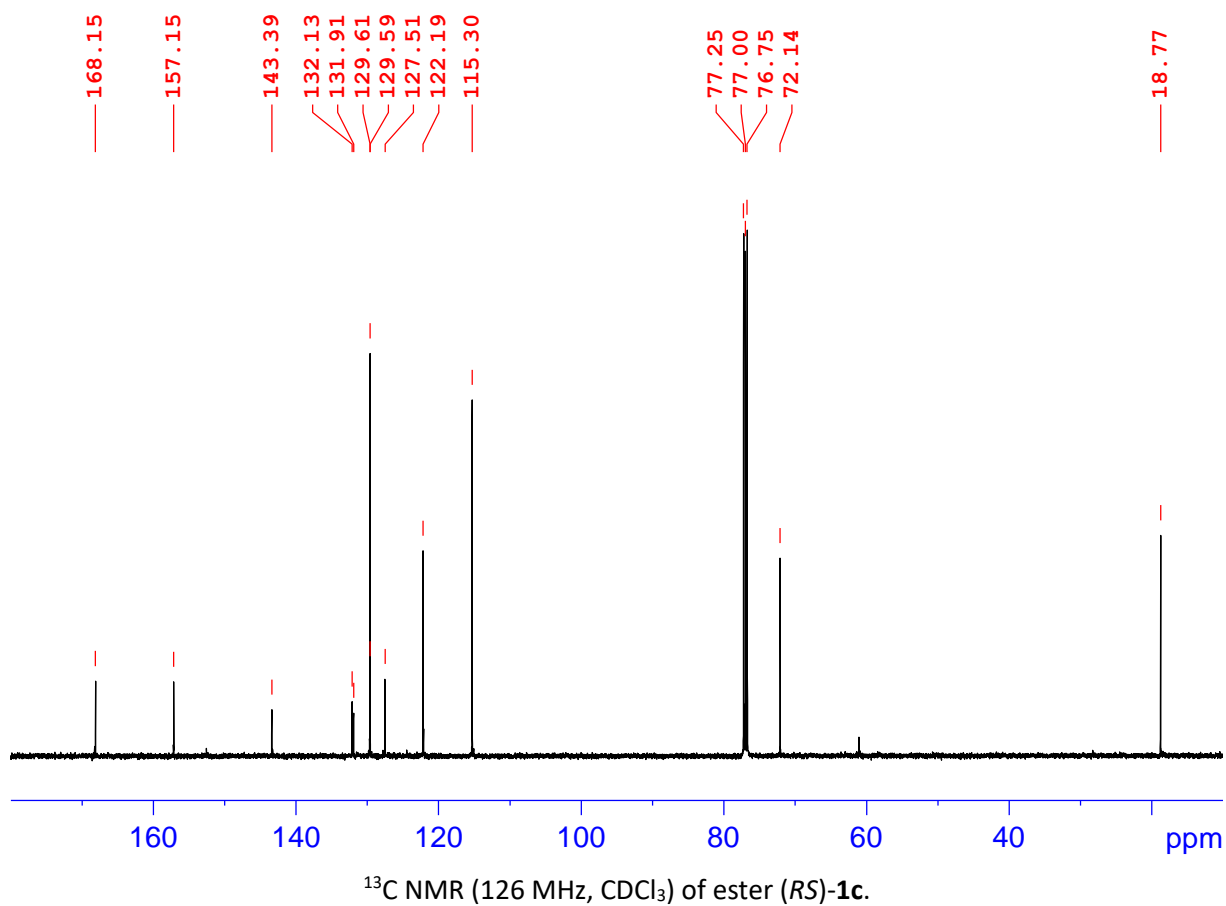

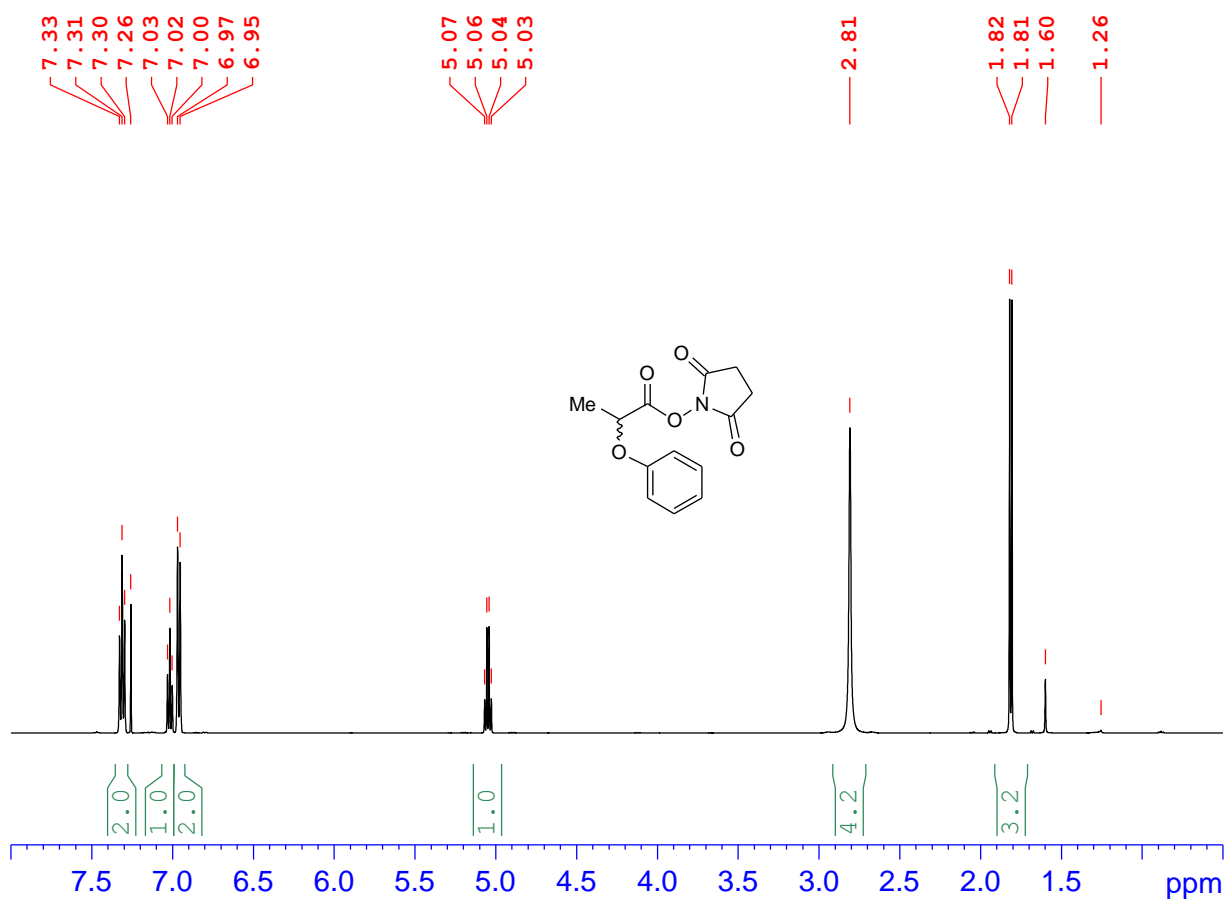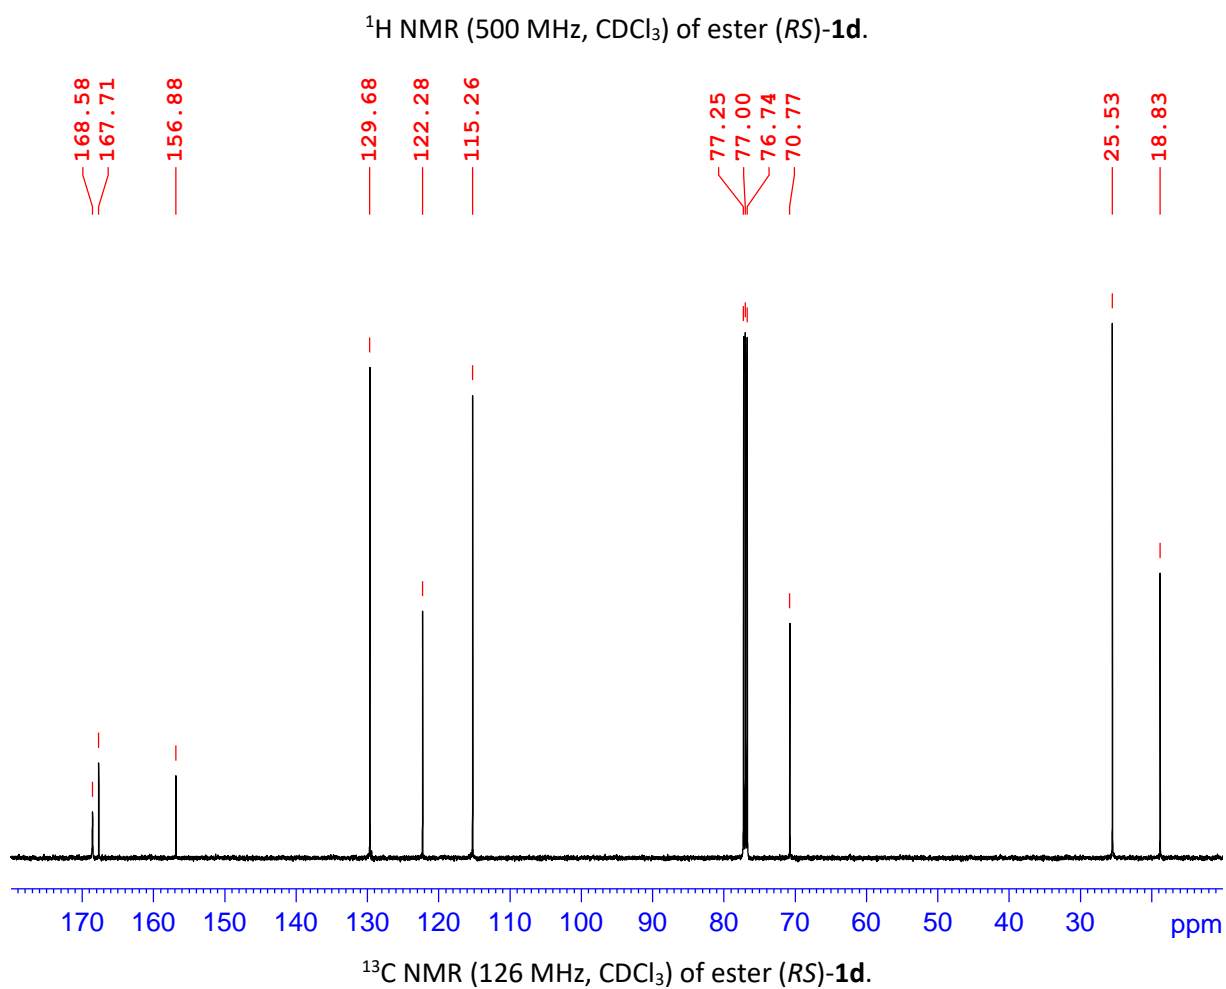

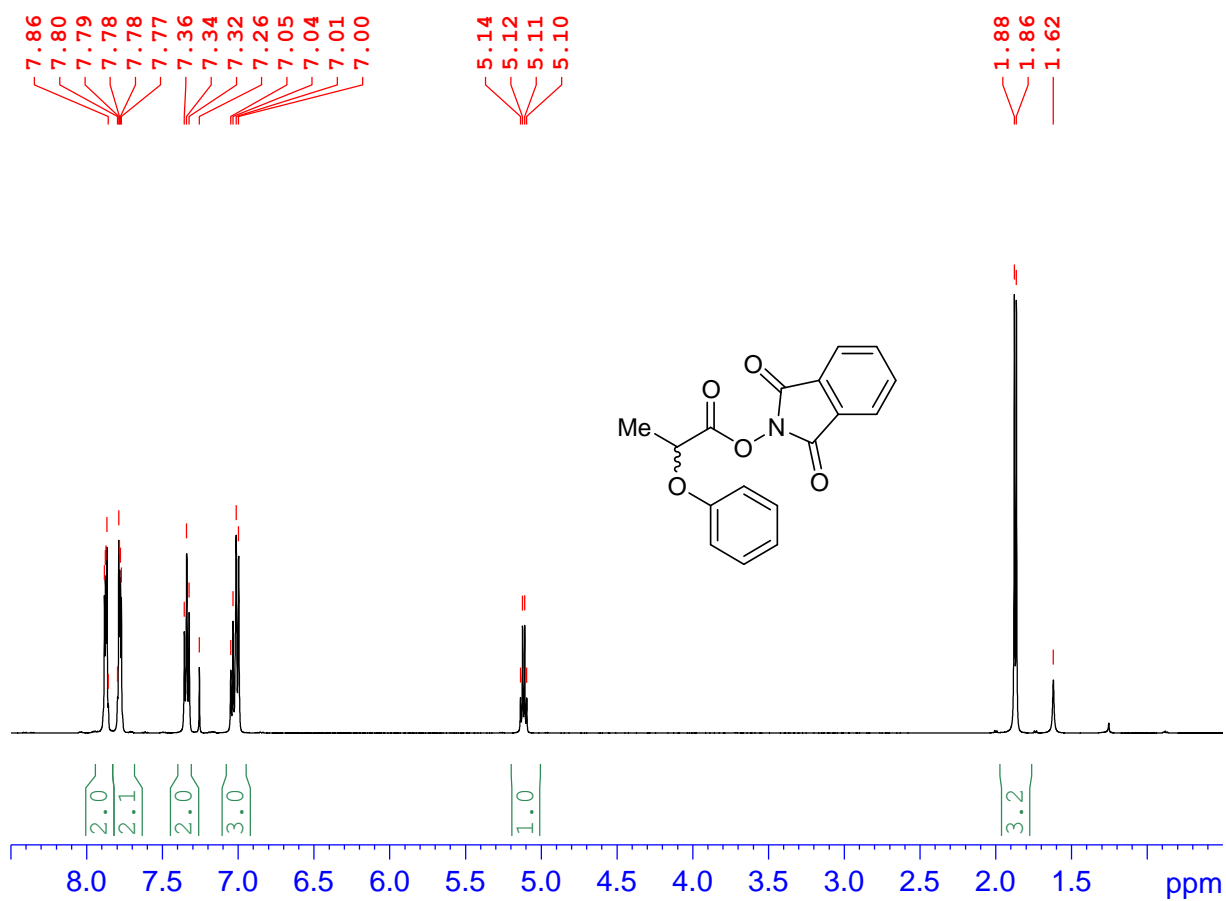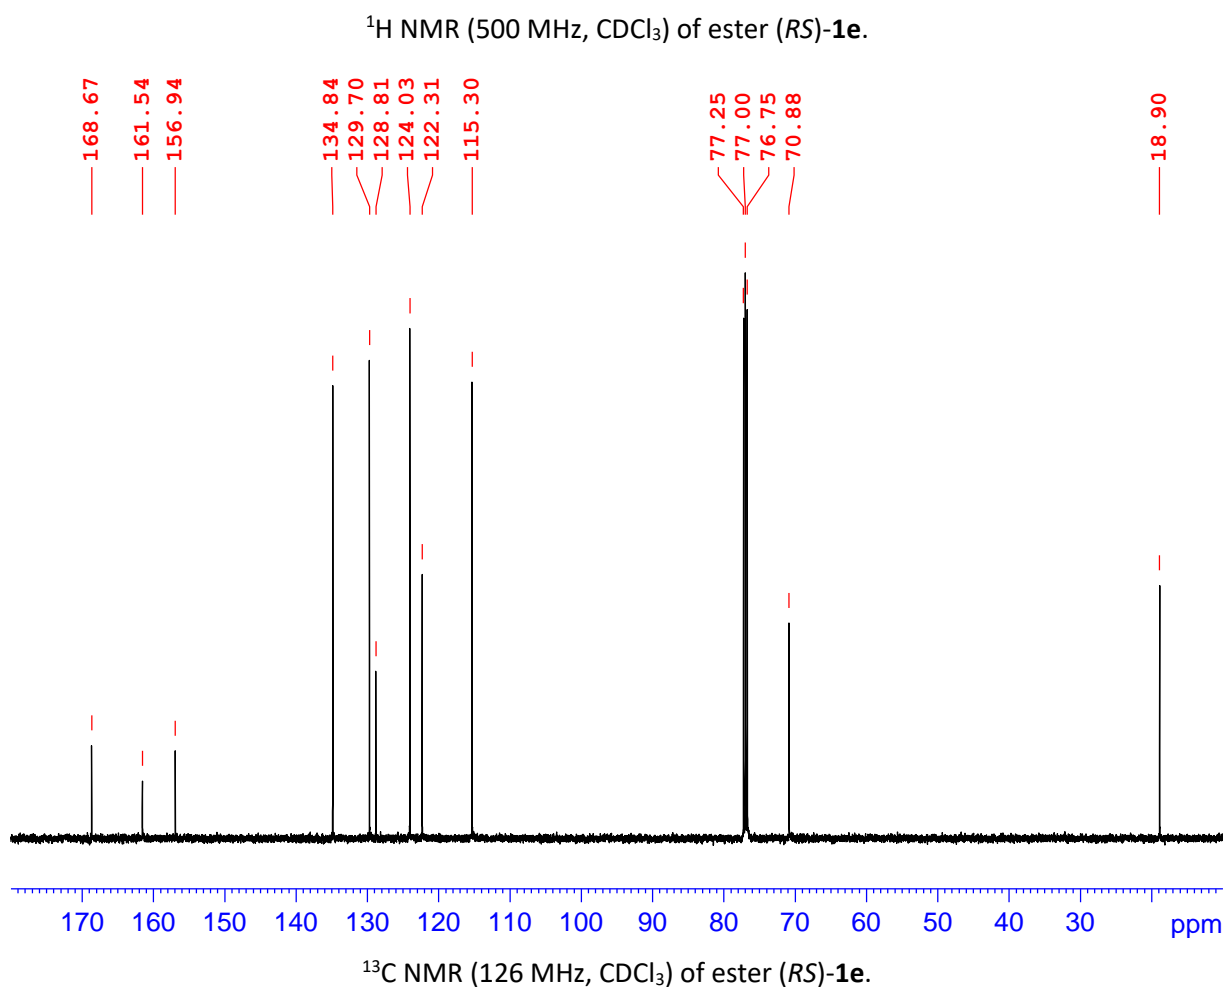

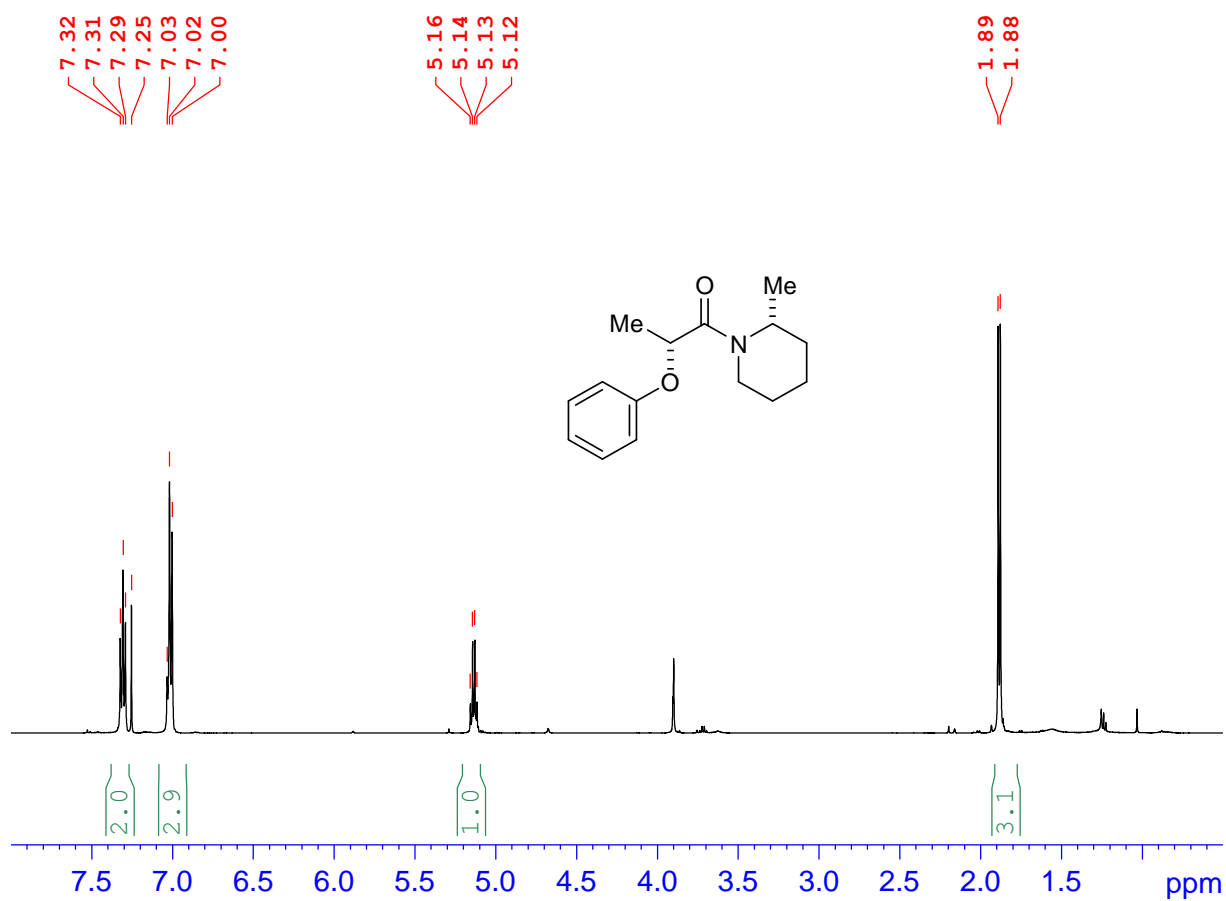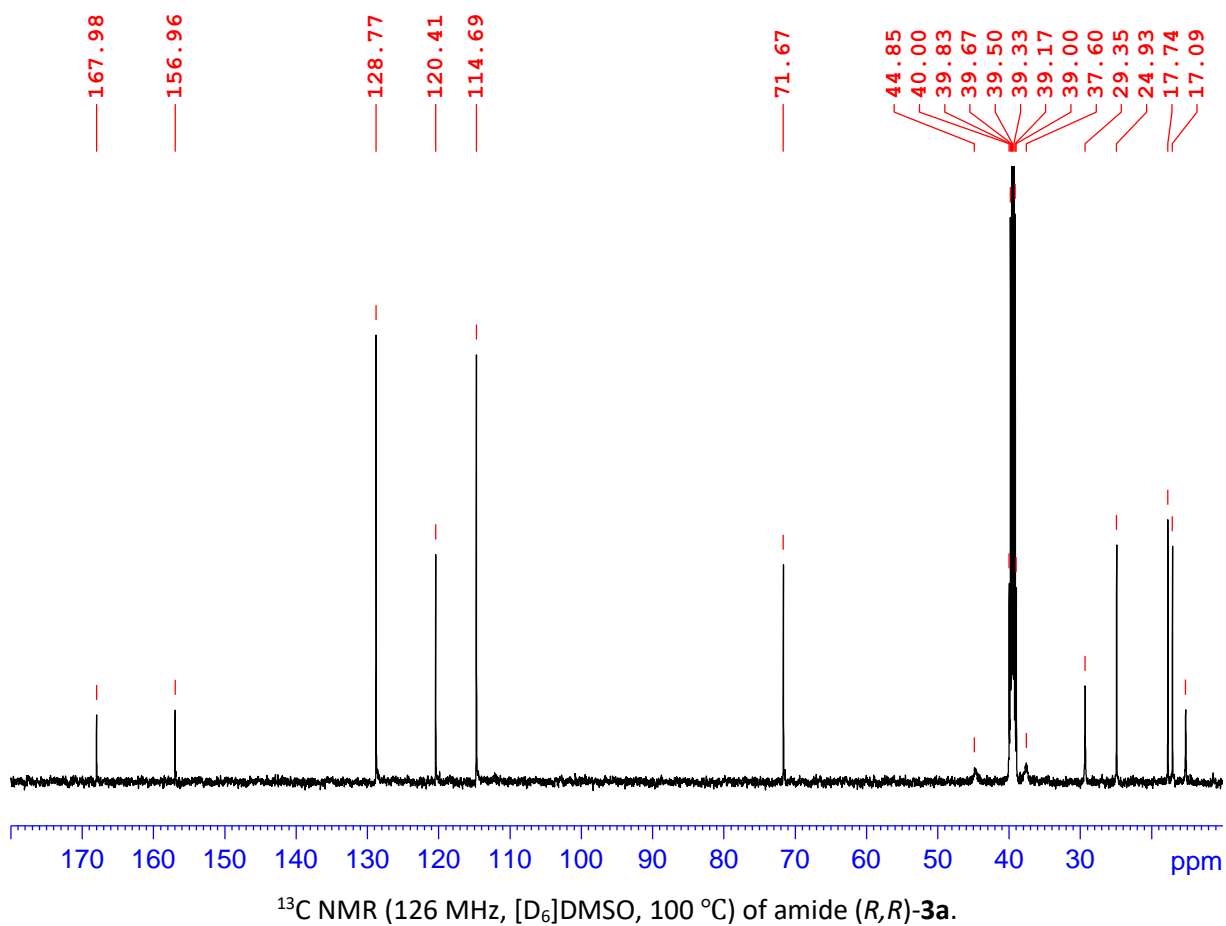

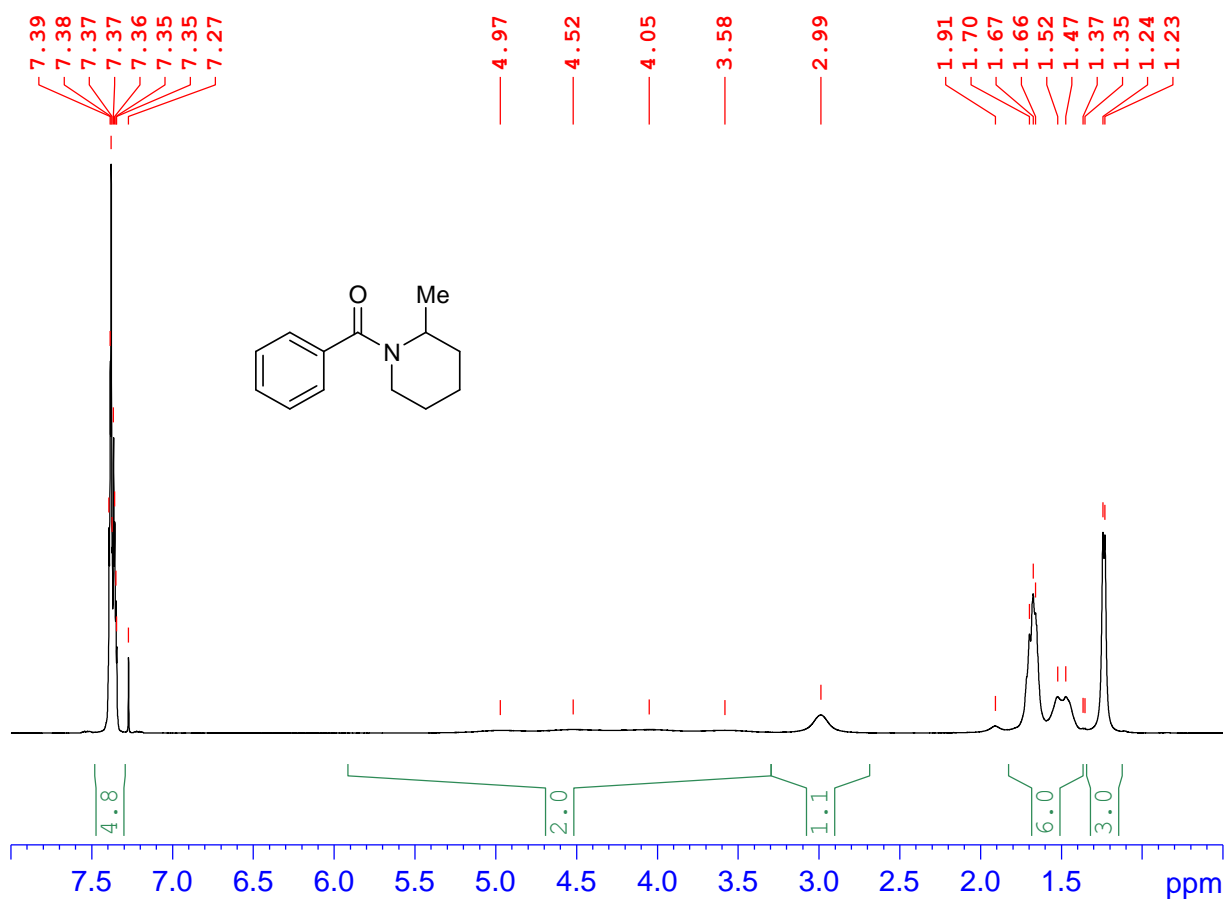

<sup>1</sup>H NMR (500 MHz, CDCl<sub>3</sub>) of compound 4a.

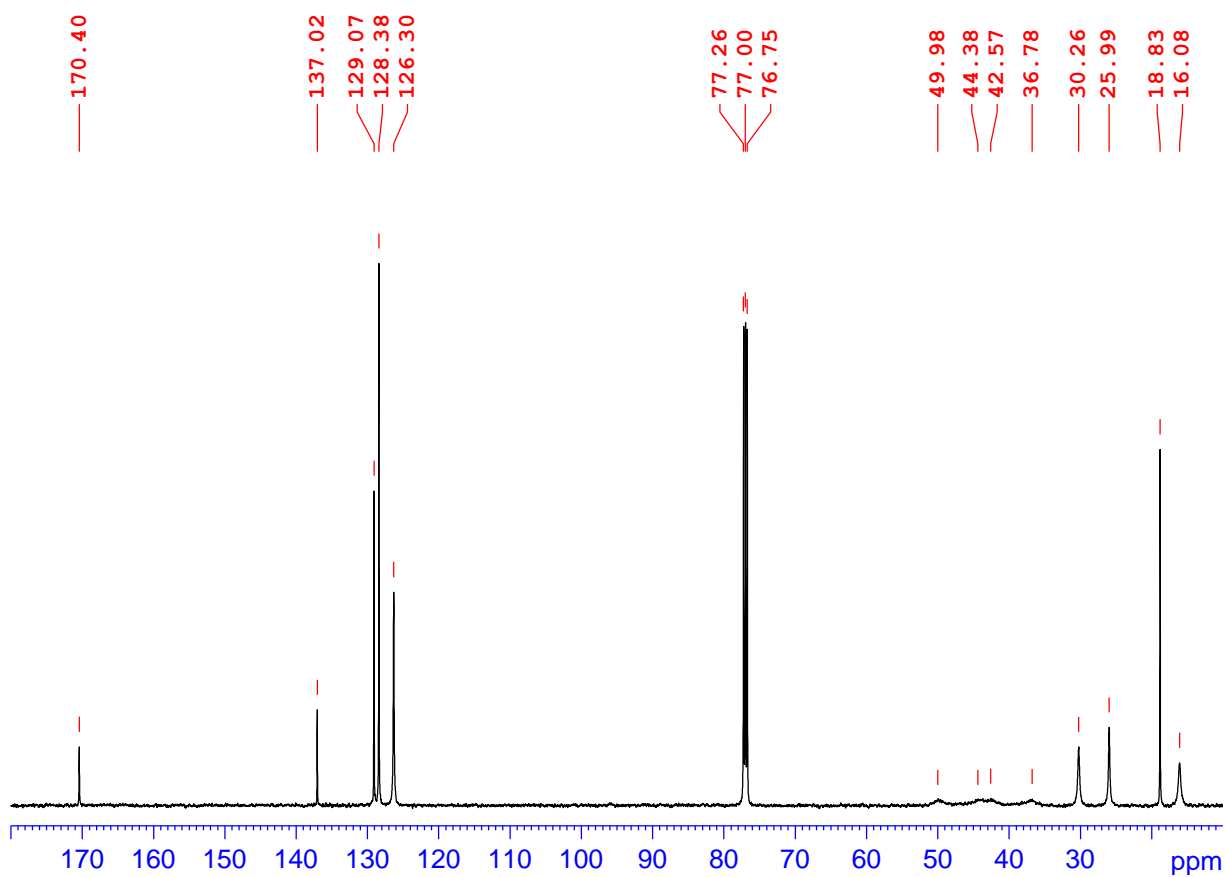

<sup>13</sup>C NMR (126 MHz, CDCl<sub>3</sub>) of compound 4a.

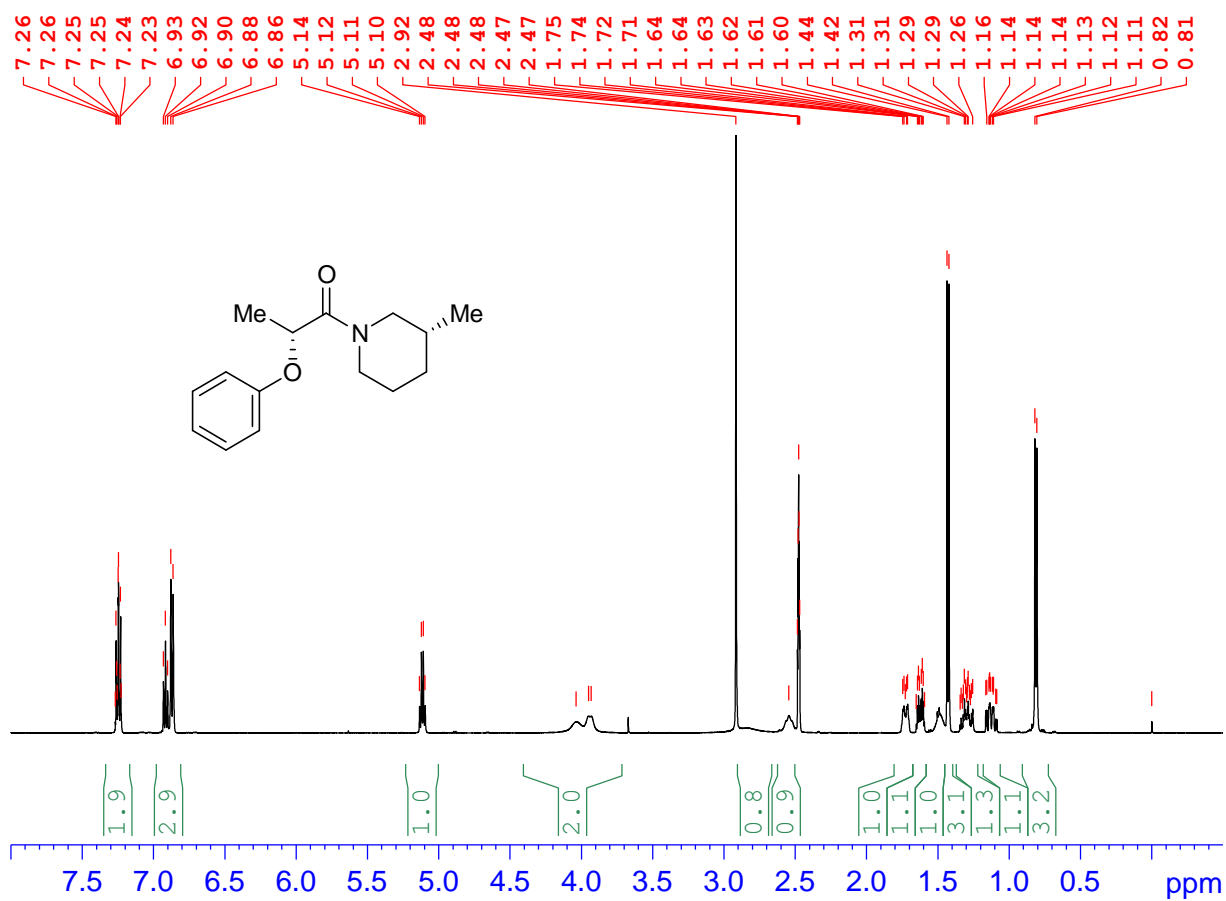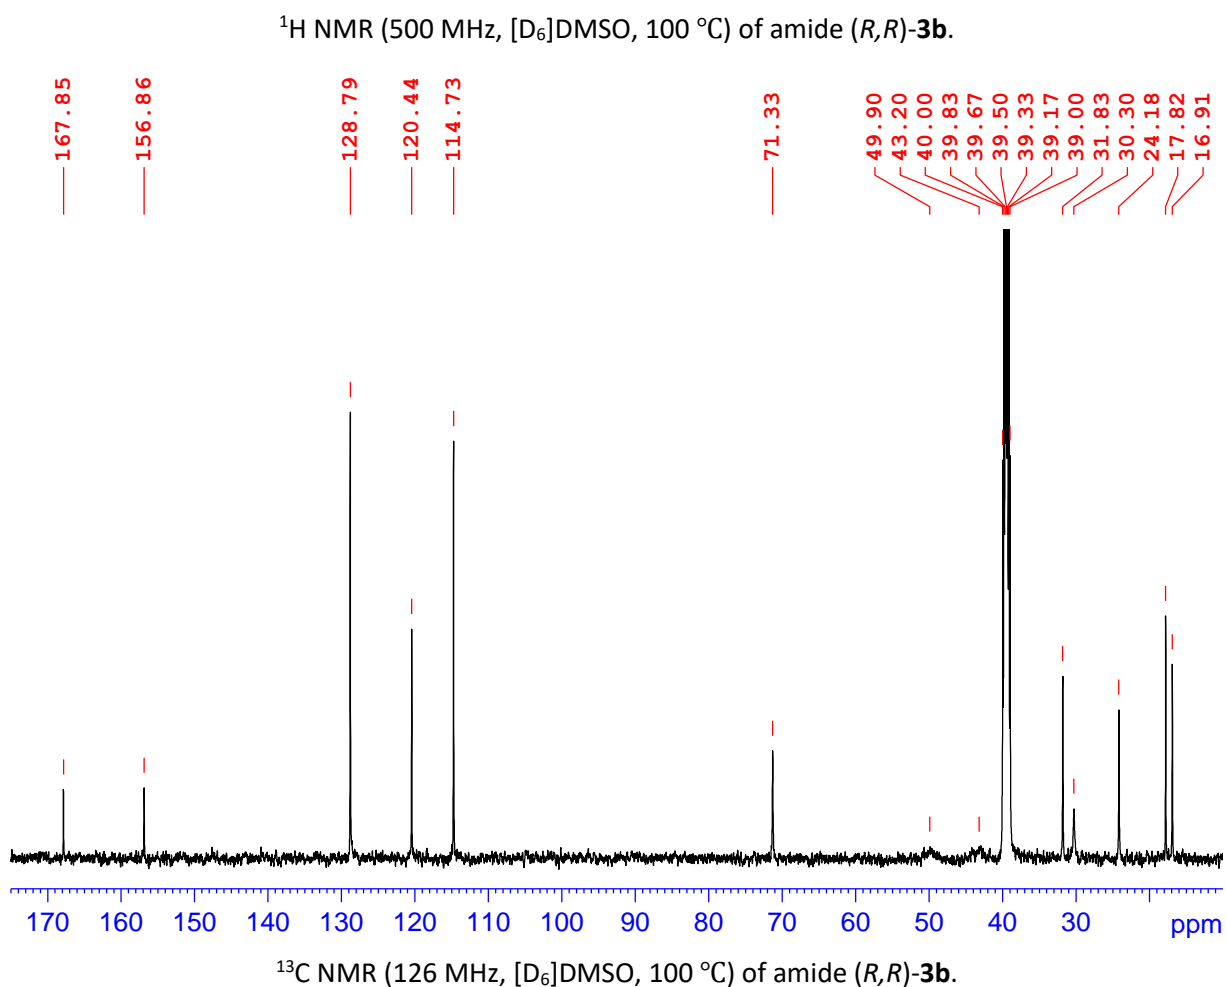

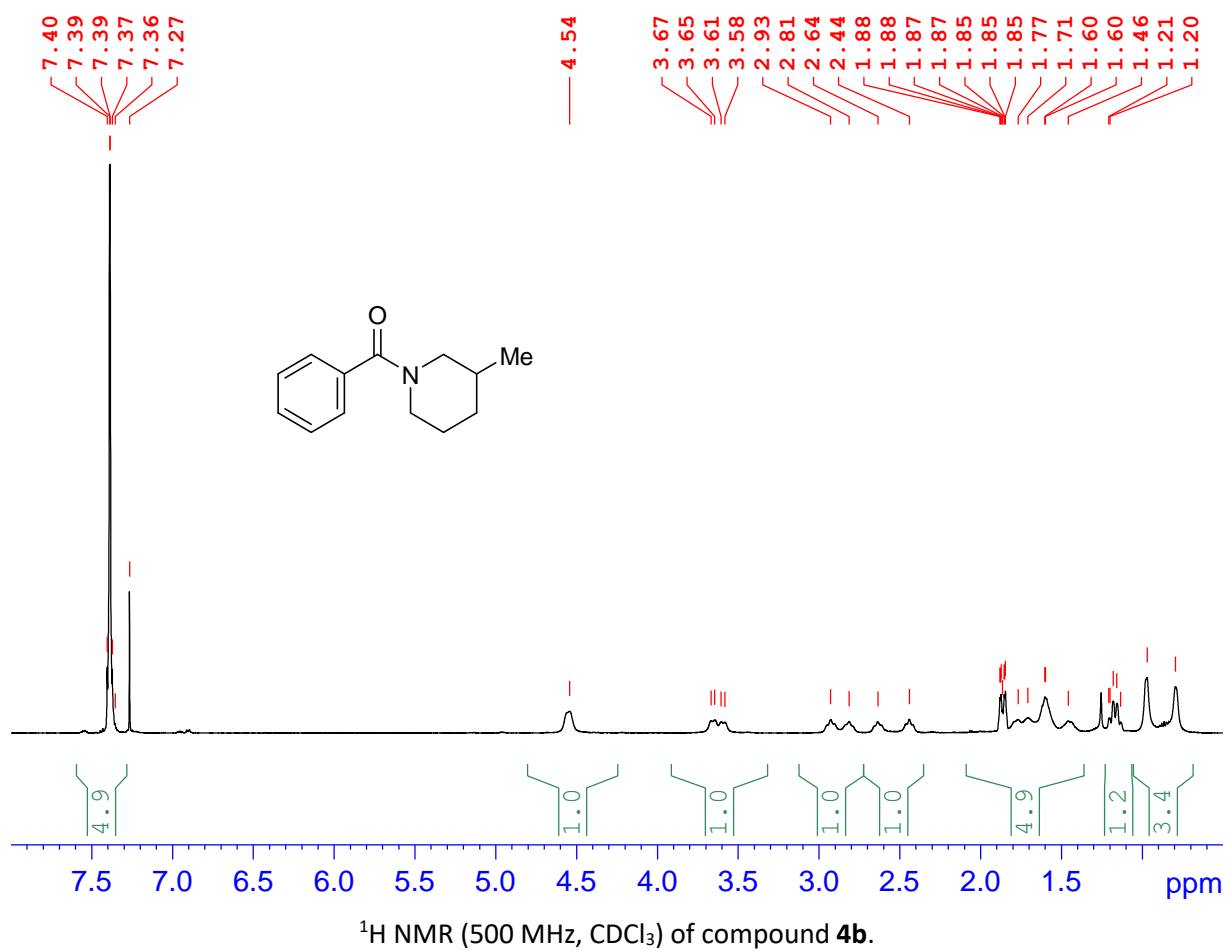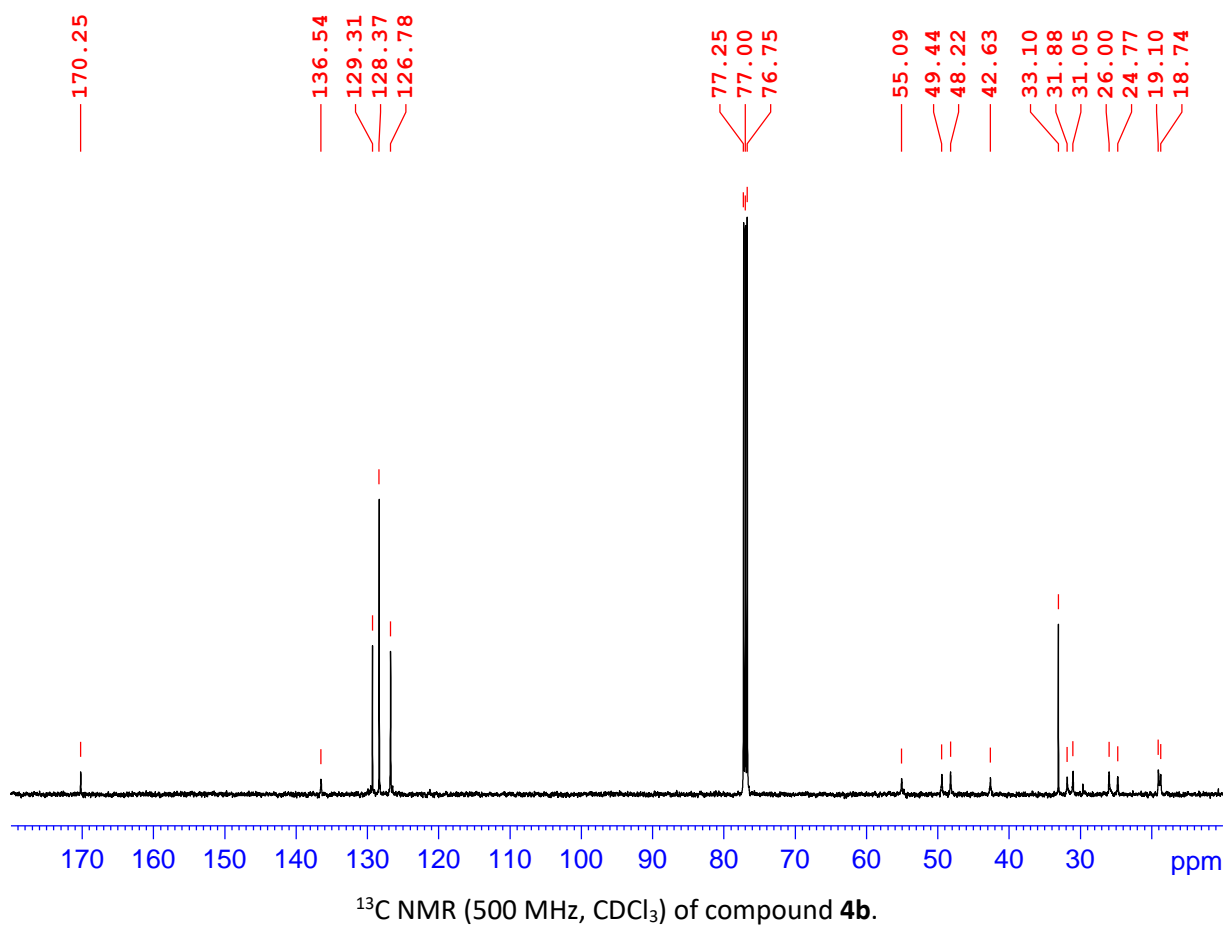



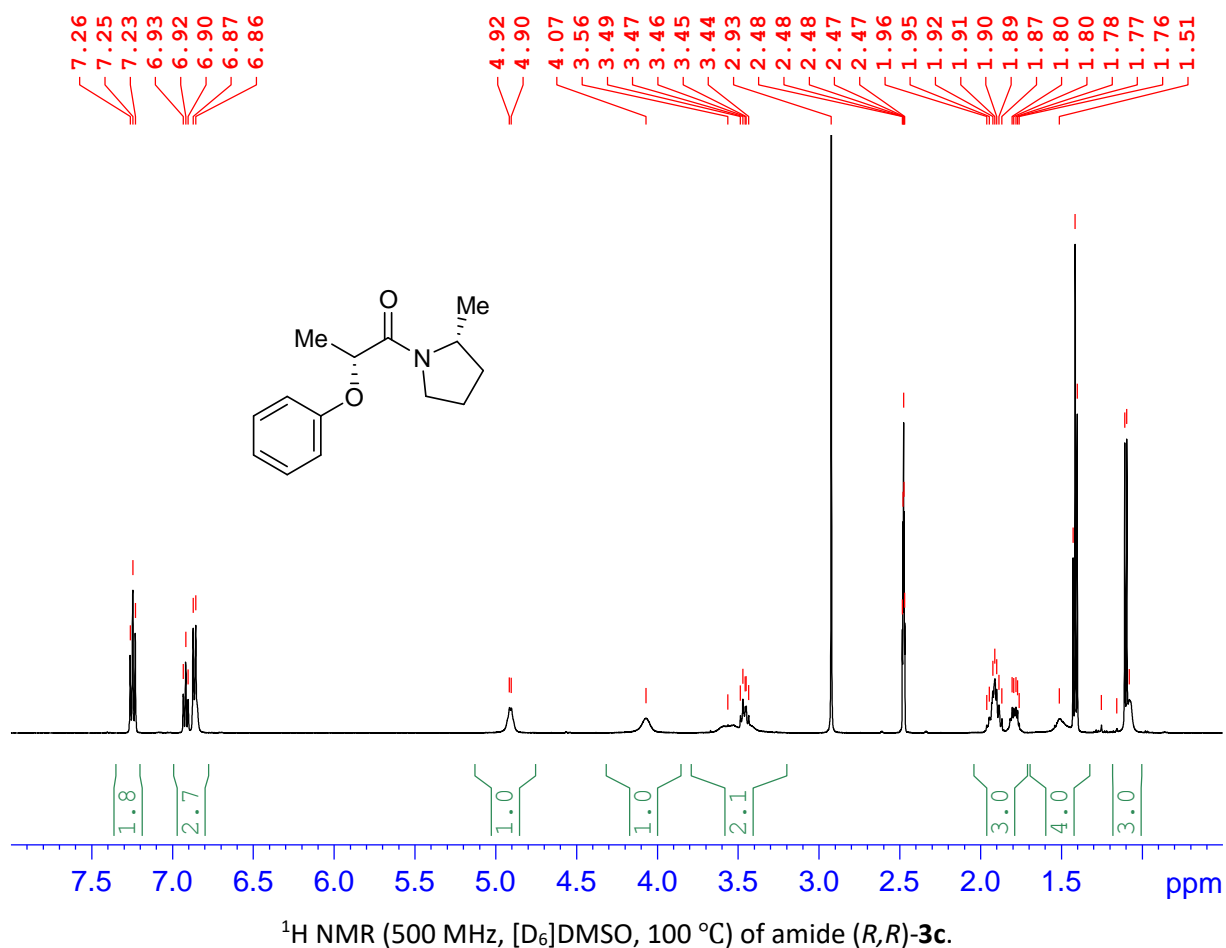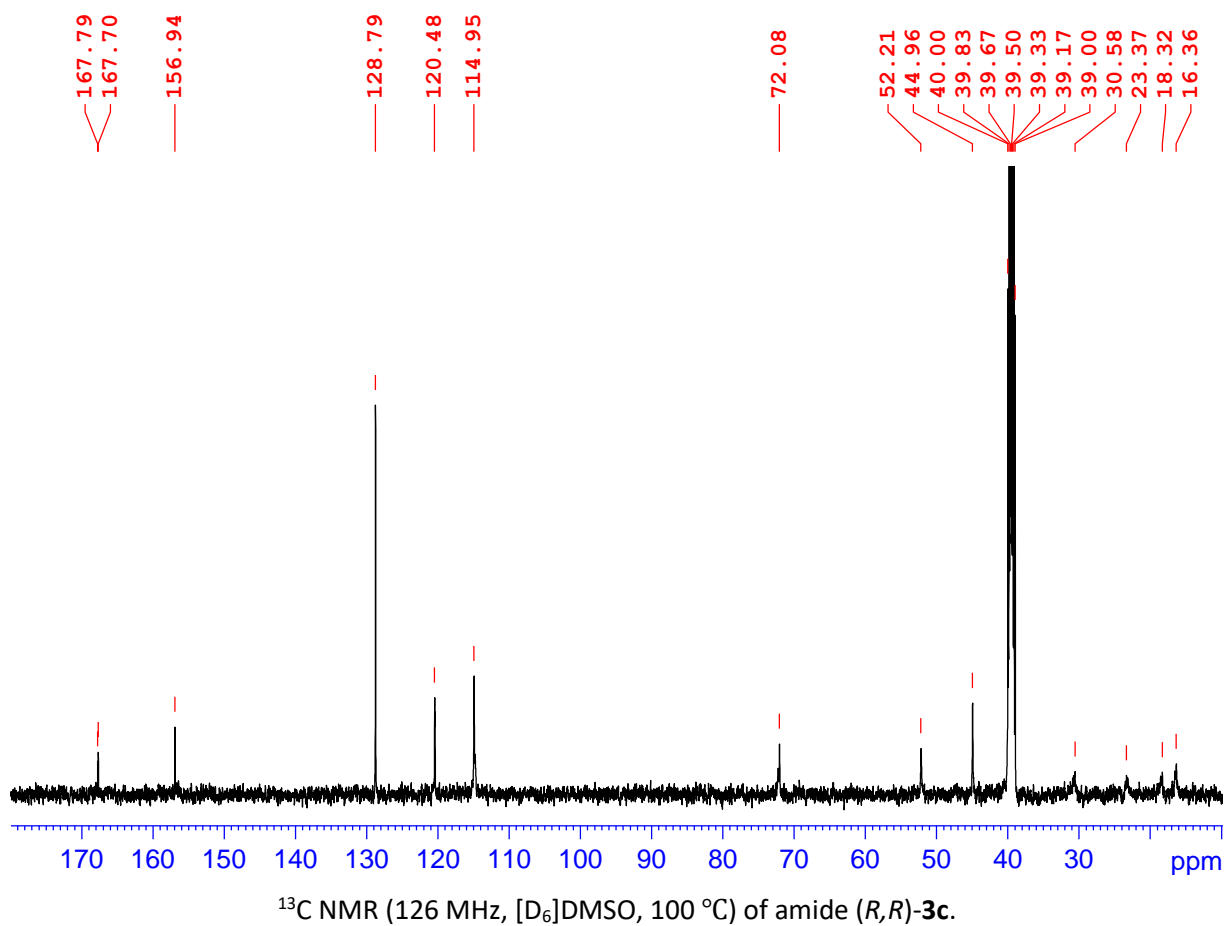

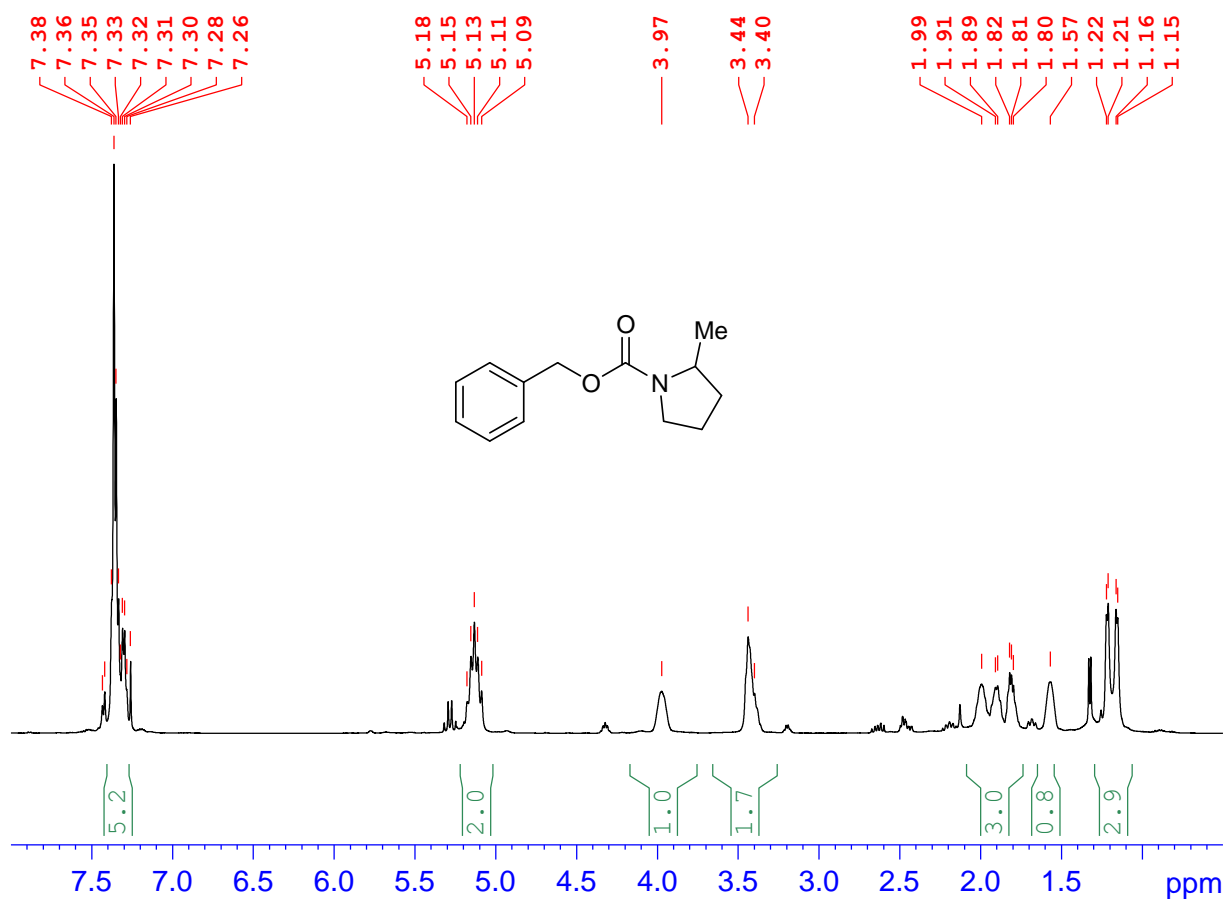

<sup>1</sup>H NMR (500 MHz, CDCl<sub>3</sub>) of compound **4c**.

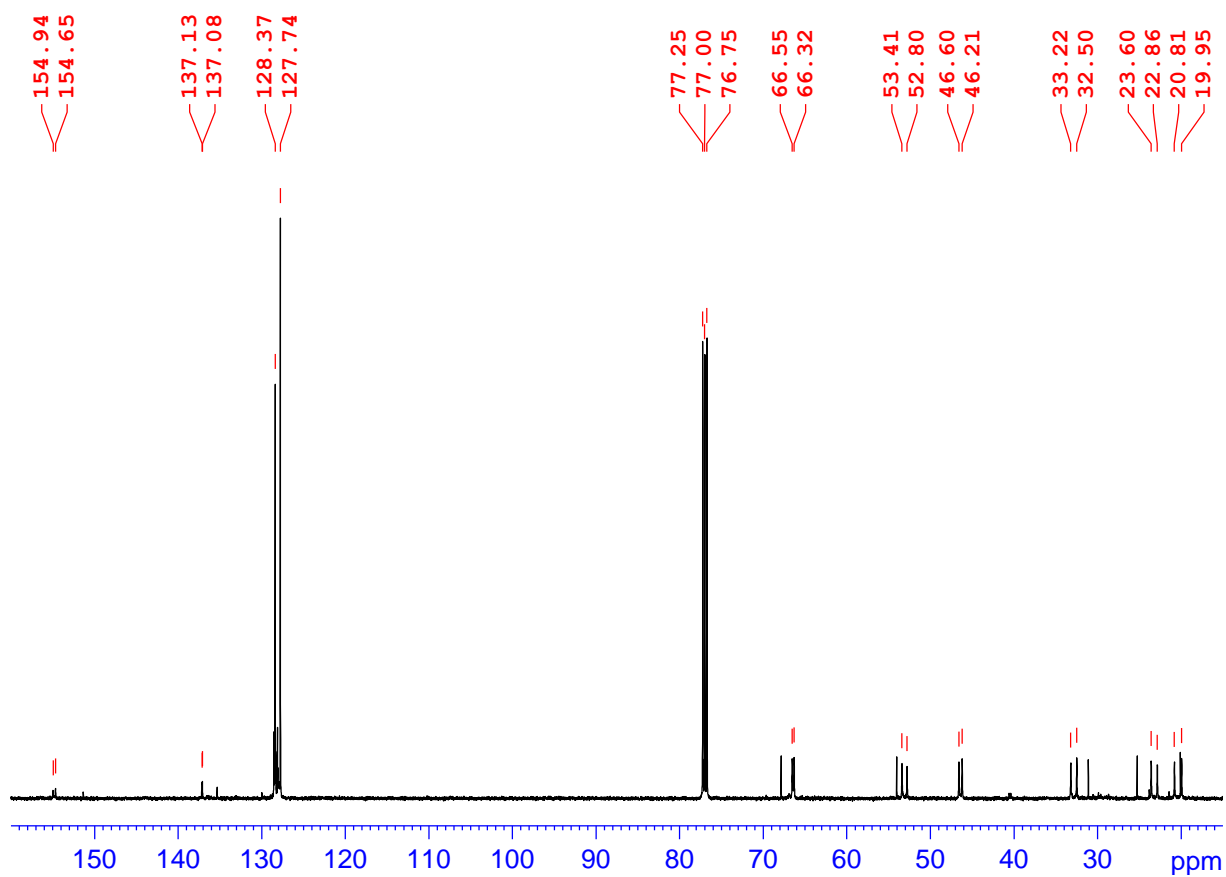

<sup>13</sup>C NMR (126 MHz, CDCl<sub>3</sub>) of compound **4c**.

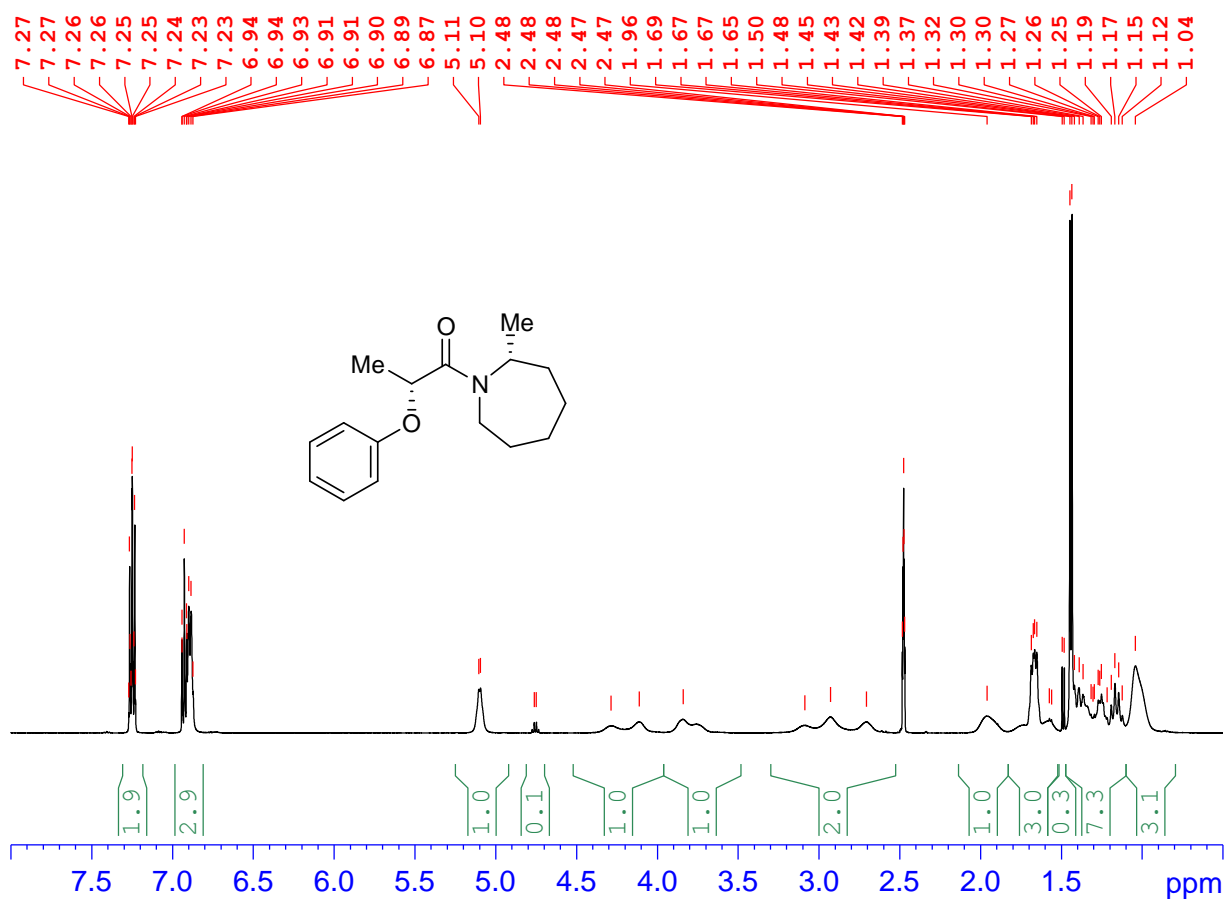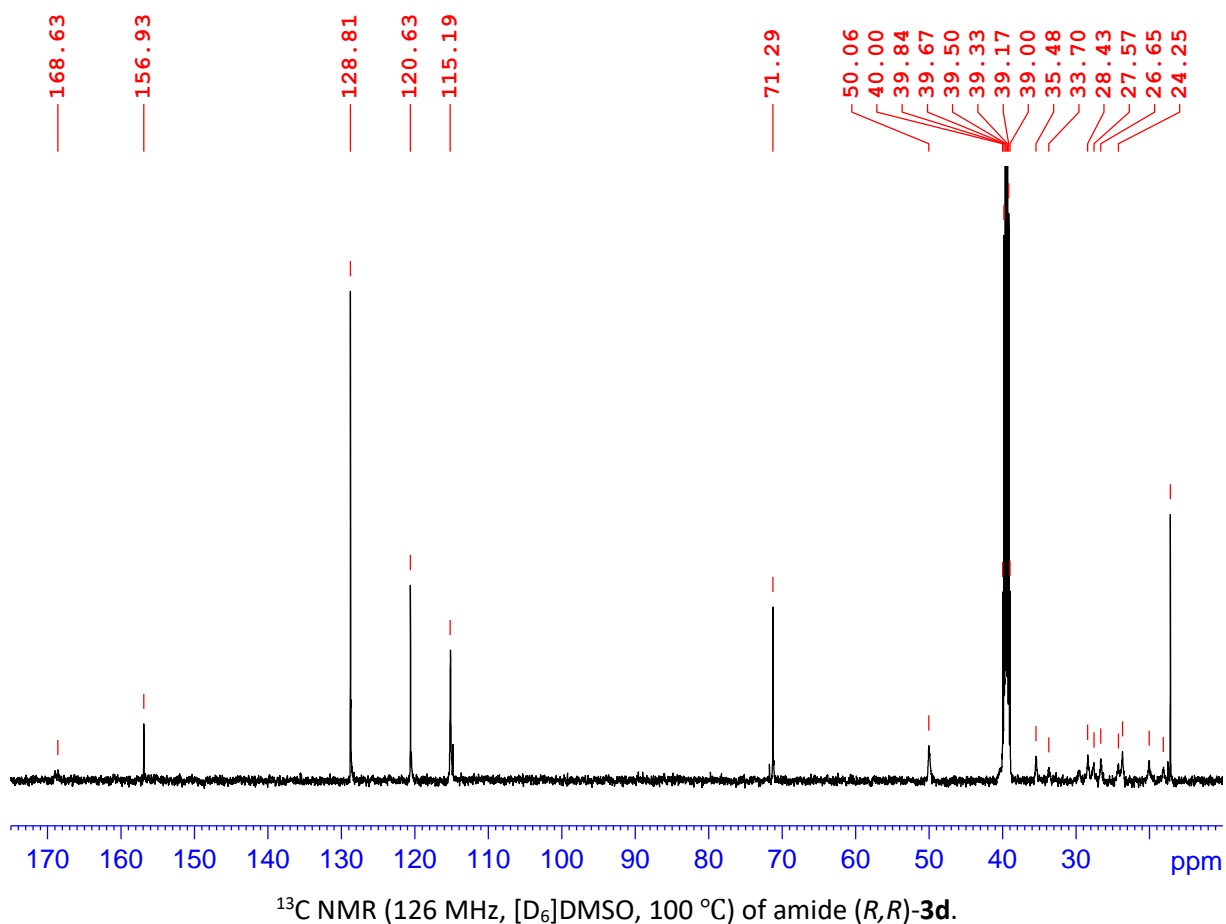

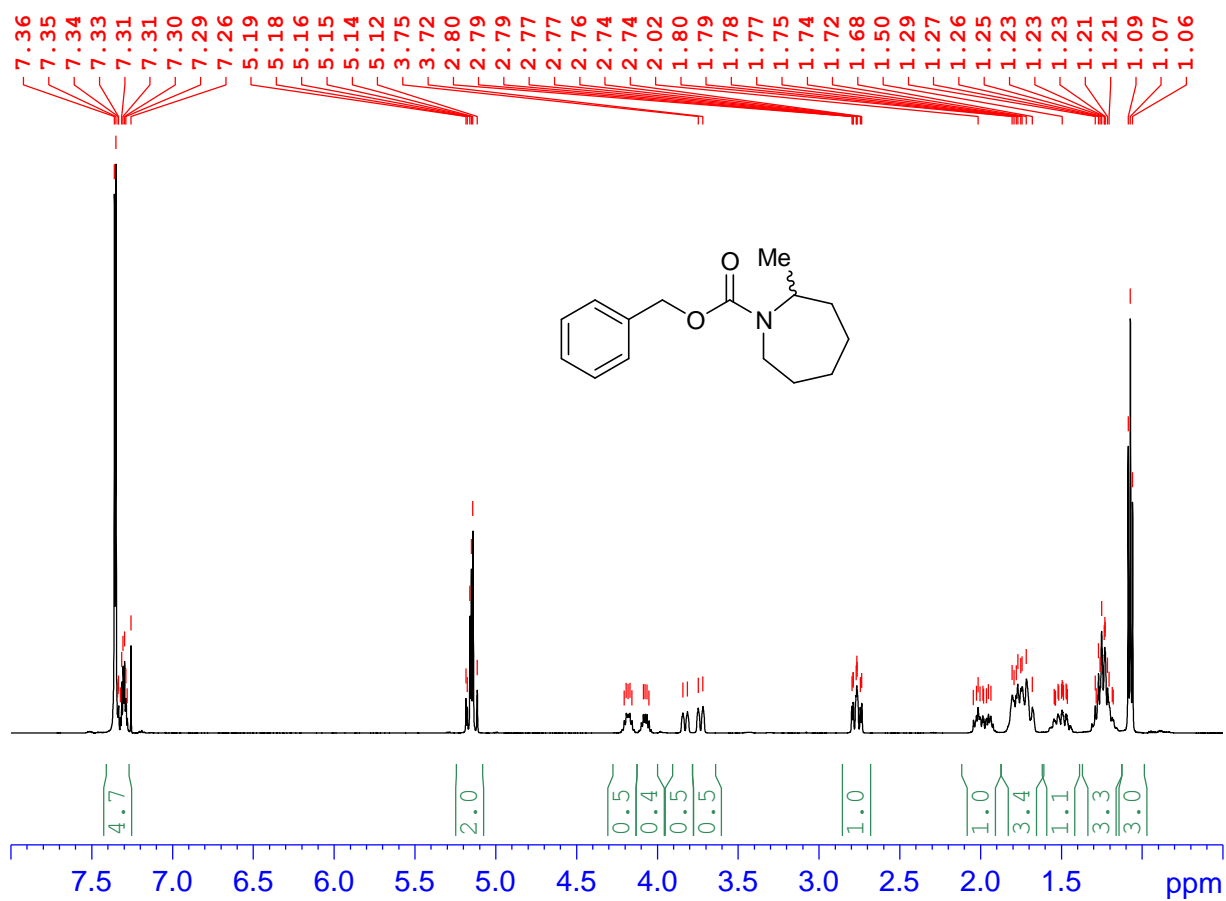

<sup>1</sup>H NMR (500 MHz, CDCl<sub>3</sub>) of compound 4d.

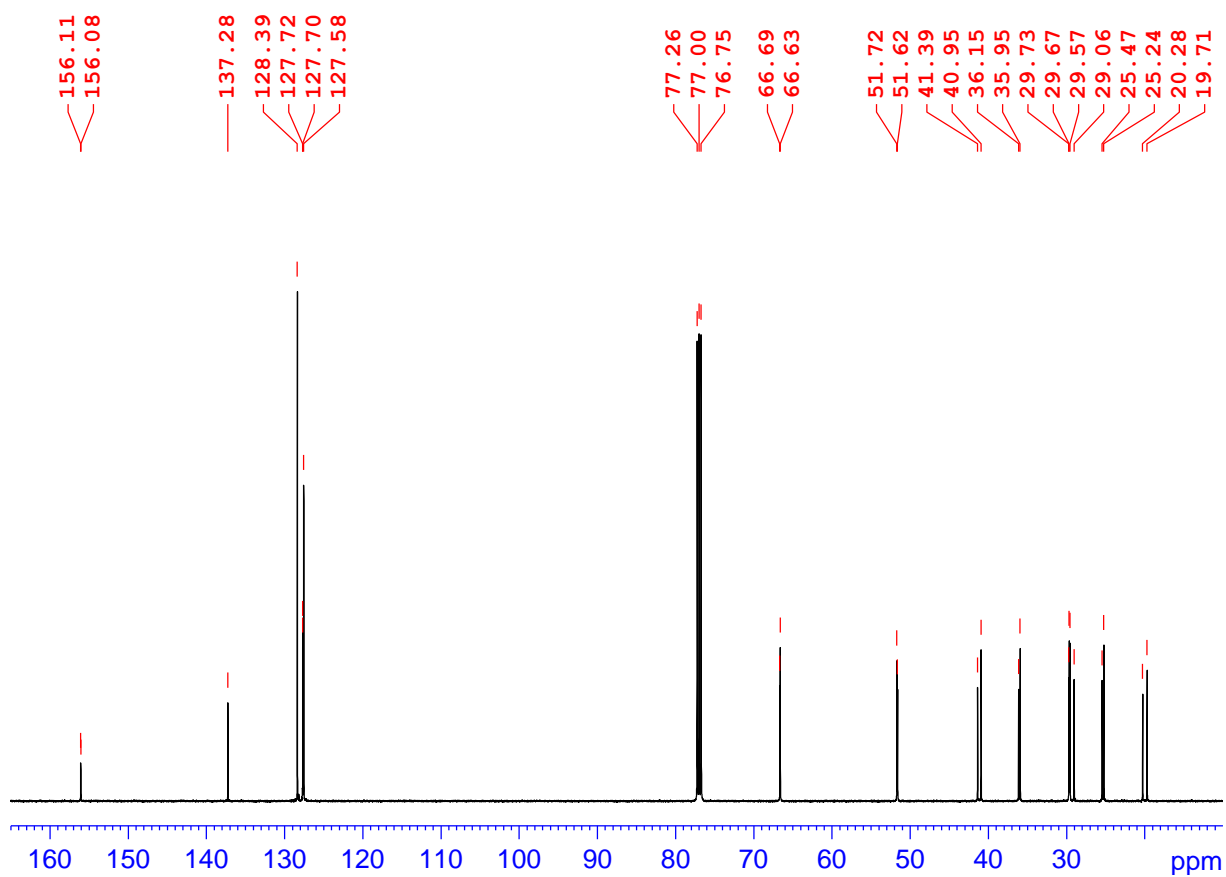

<sup>13</sup>C NMR (126 MHz, CDCl<sub>3</sub>) of compound 4d.

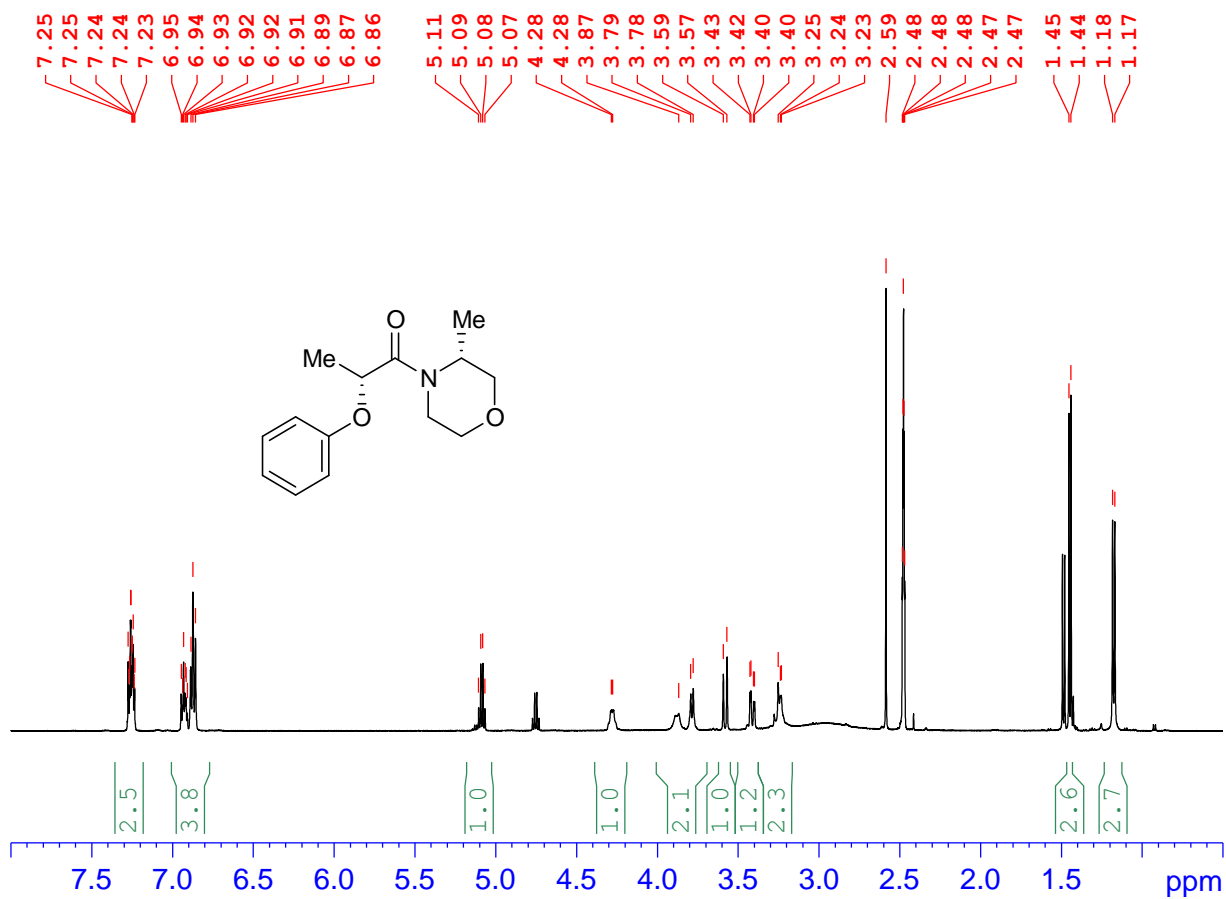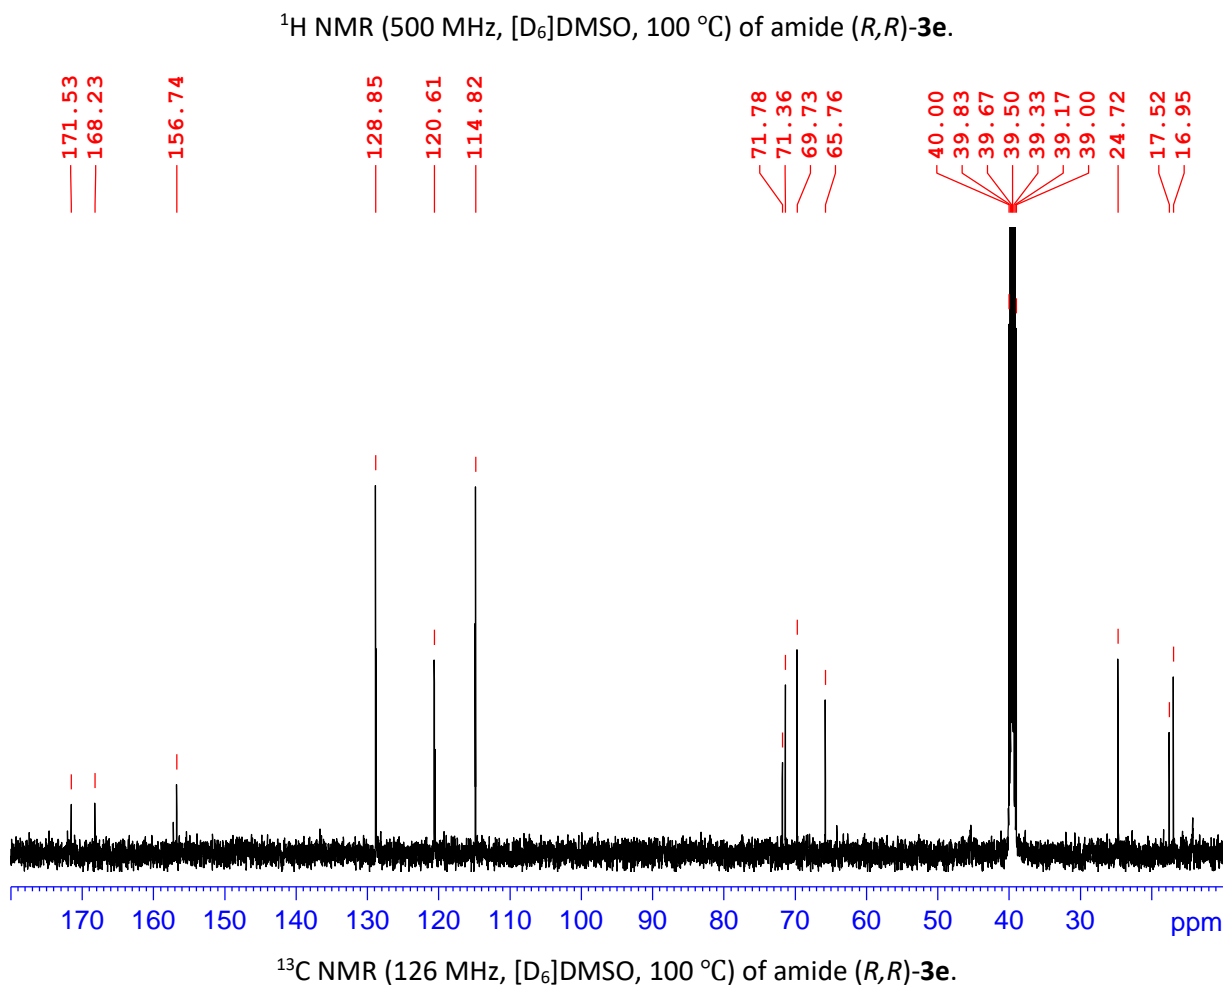

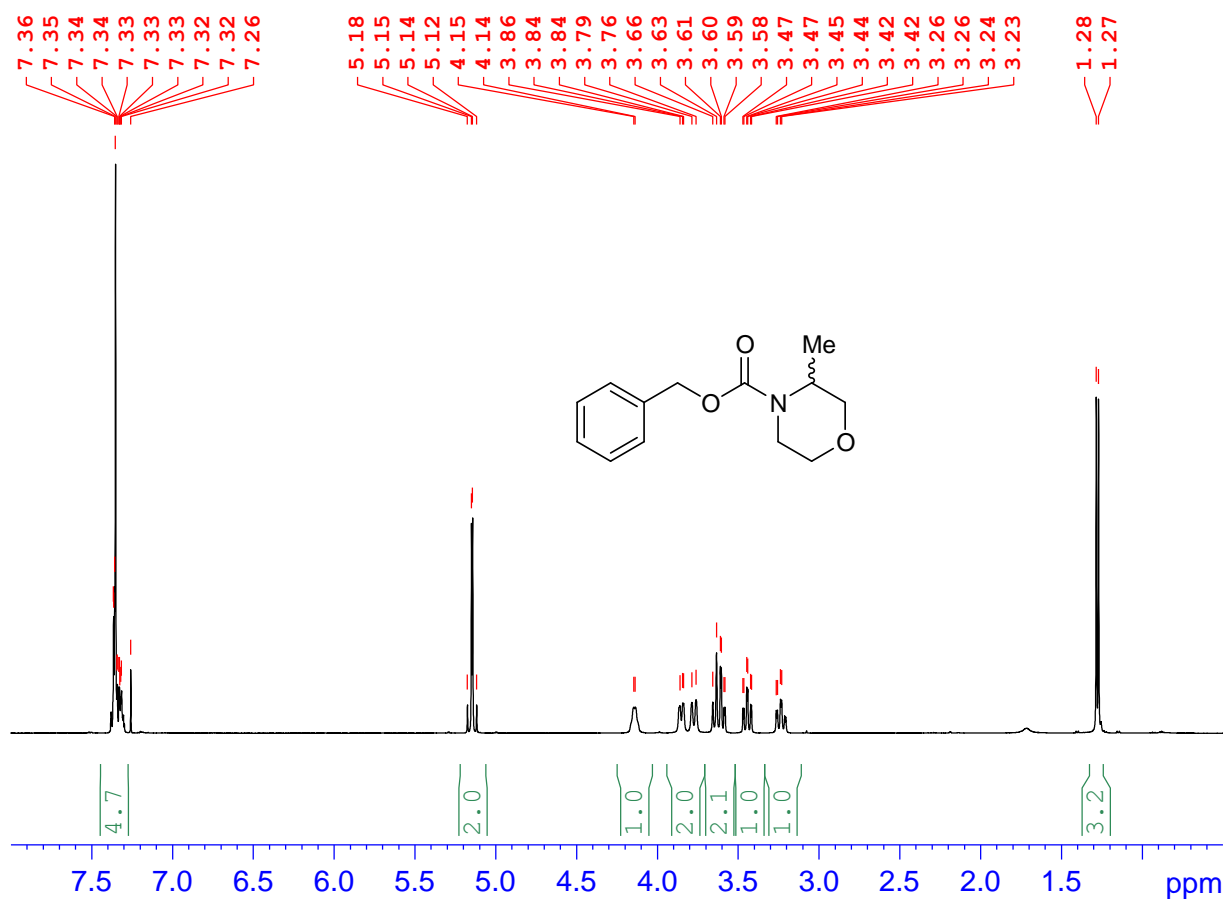

<sup>1</sup>H NMR (500 MHz, CDCl<sub>3</sub>) of compound 4e.

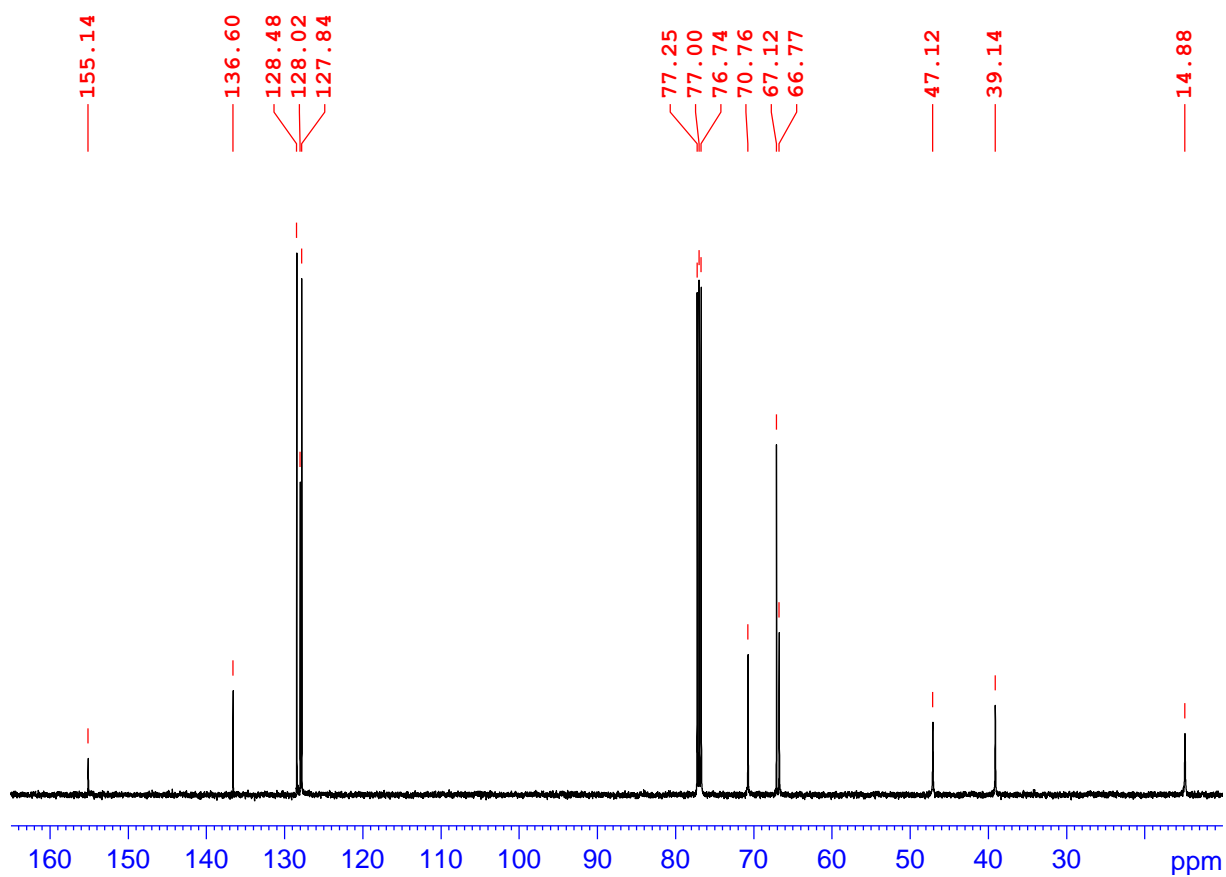

<sup>13</sup>C NMR (126 MHz, CDCl<sub>3</sub>) of compound 4e.

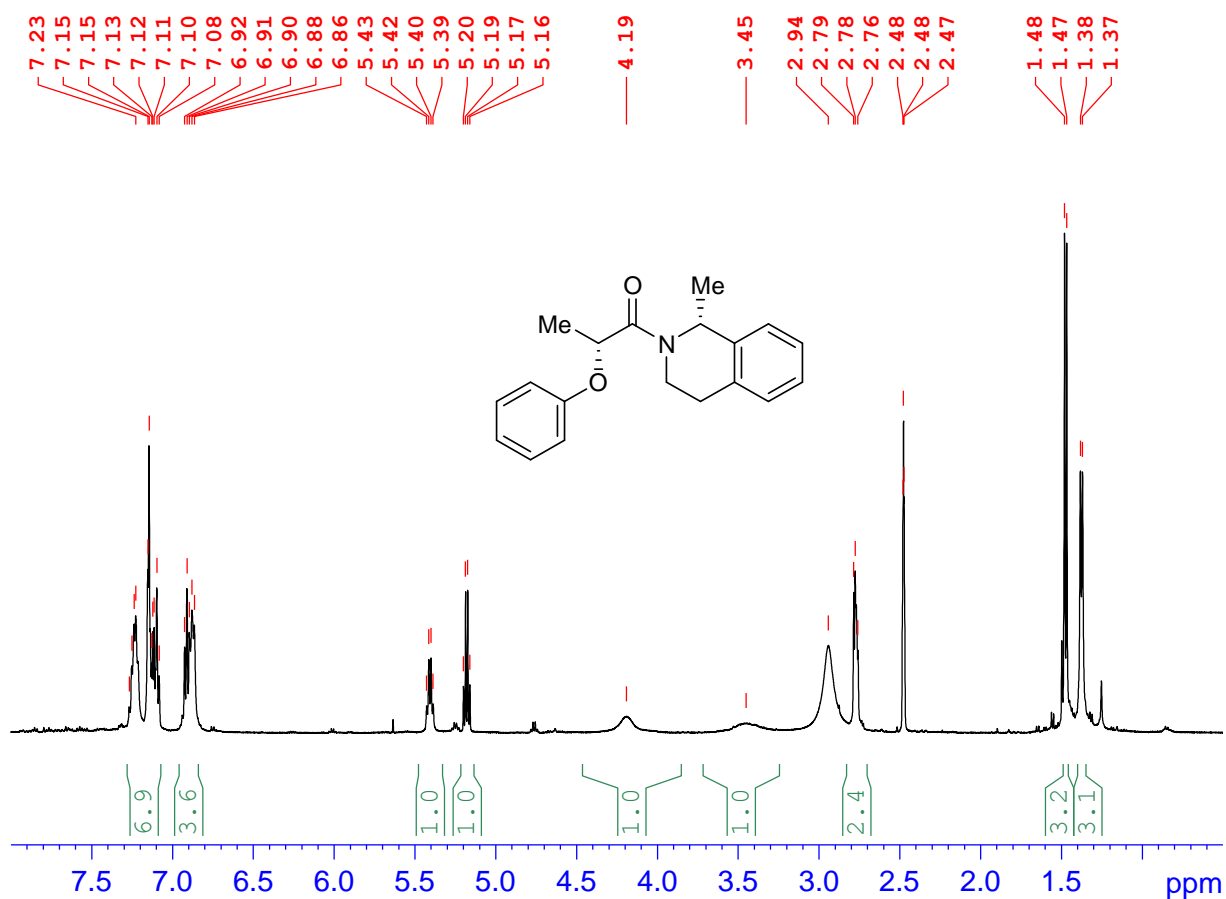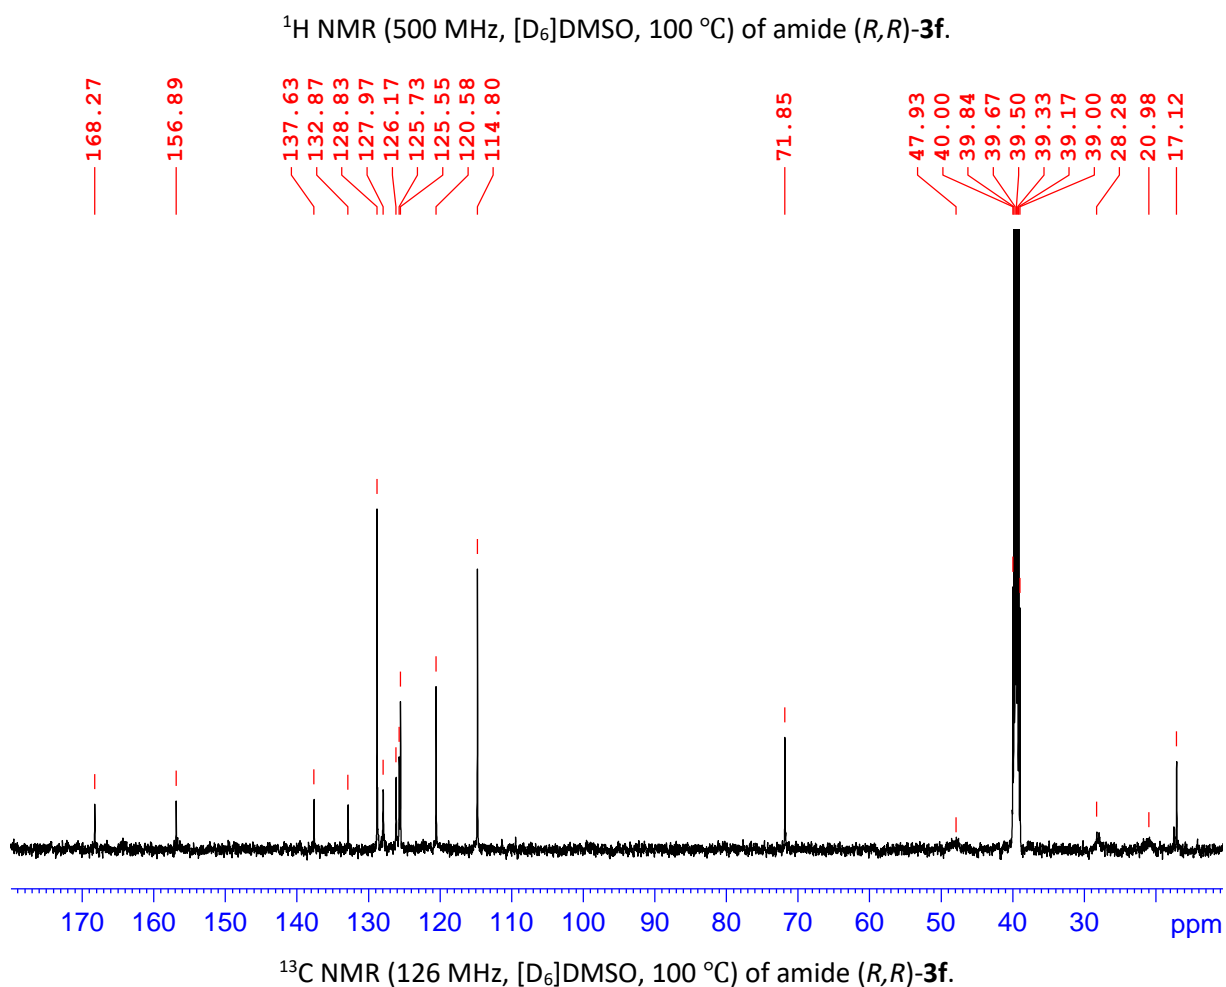

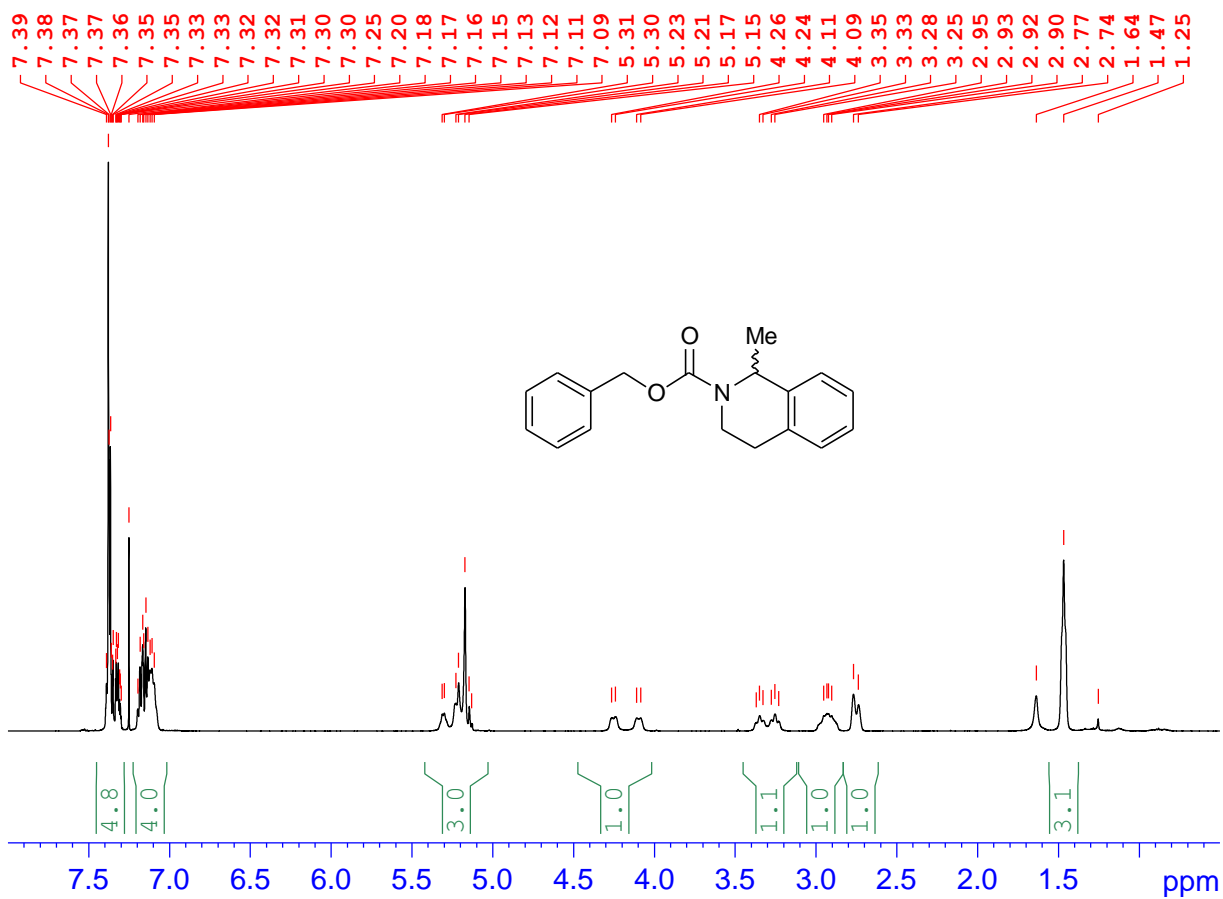

<sup>1</sup>H NMR (500 MHz, CDCl<sub>3</sub>) of compound 4f.

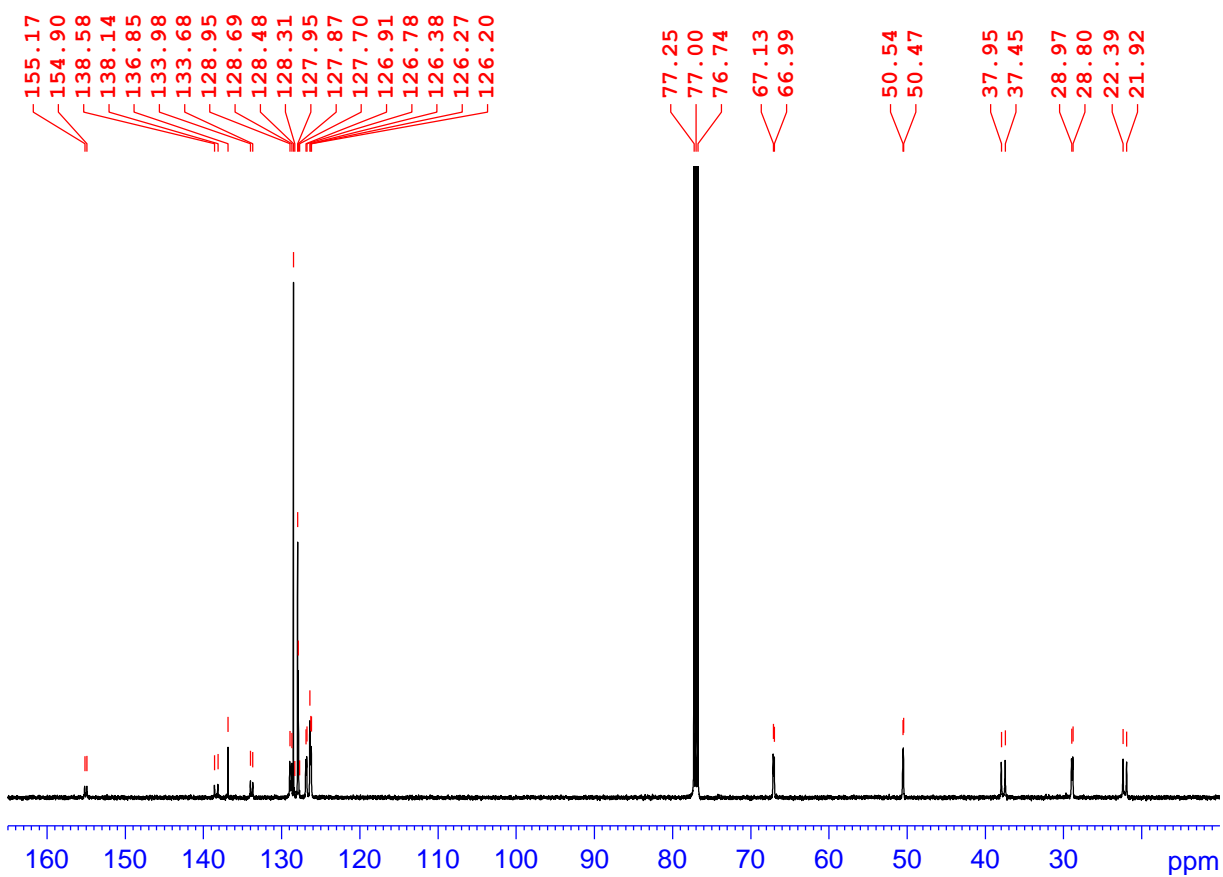

<sup>13</sup>C NMR (126 MHz, CDCl<sub>3</sub>) of compound 4f.



## Selected GC and HPLC chromatograms

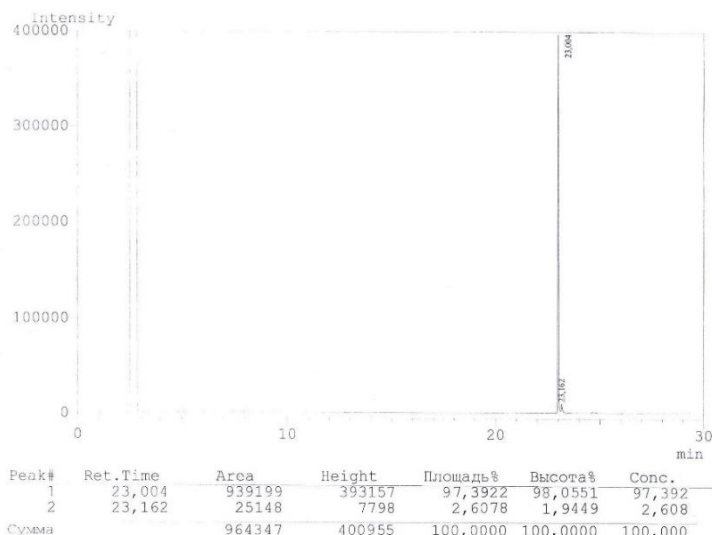

GC of compound (*R,R*)-**3a** (Shimadzu GC-2010, ZB-5 capillary column (30 m × 0.25 mm × 0.25 μm)):  
 $t_{(R,R)\text{-3a}} = 23.00$  min,  $t_{(R,S)\text{-3a}} = 23.16$  min (94.8% *de*)

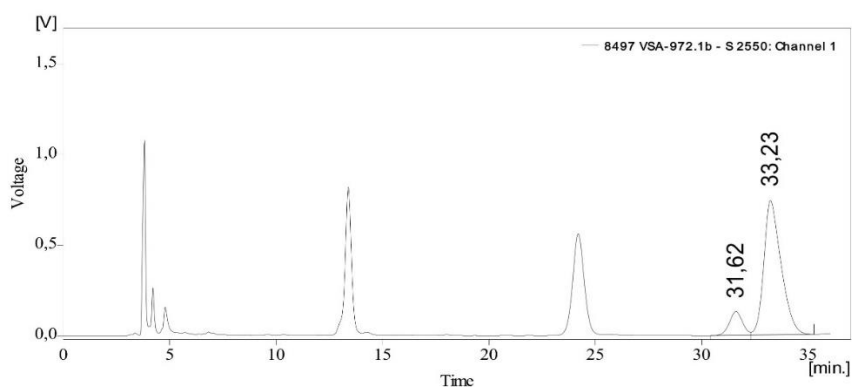

Result Table (Uncal - 8497 VSA-972.1b - S 2550: Channel 1)

|       | Reten. Time [min] | Area [mAU.s] | Height [mAU] | Area [%] | Height [%] | W05 [min] |
|-------|-------------------|--------------|--------------|----------|------------|-----------|
| 1     | 31,617            | 5637,047     | 130,764      | 11,9     | 15,0       | 0,67      |
| 2     | 33,233            | 41771,292    | 743,280      | 88,1     | 85,0       | 0,87      |
| Total |                   | 47408,339    | 874,044      | 100,0    | 100,0      |           |

HPLC of compound (*S*)-**4a** (Knauer Smartline-1100, *S,S*-Whelk O1 column (250 × 4.6 mm), detection at 220 nm, 1 mL/min flow rate, *n*-hexane/*i*PrOH, 5:1):  $t_{(R)\text{-4a}} = 31.6$  min,  $t_{(S)\text{-4a}} = 33.2$  min (76.2% *ee*)

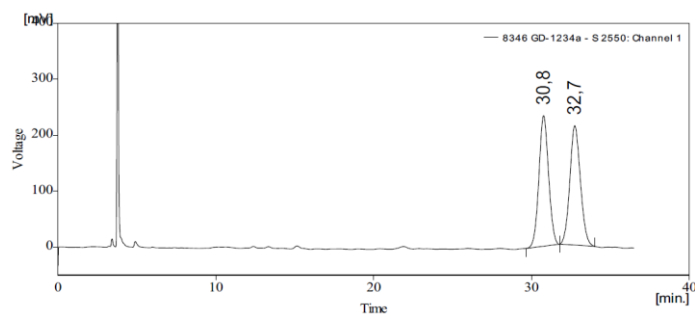

Result Table (Uncal - 8346 GD-1234a - S 2550: Channel 1)

|       | Reten. Time [min] | Area [mAU.s] | Height [mAU] | Area [%] | Height [%] | W05 [min] |
|-------|-------------------|--------------|--------------|----------|------------|-----------|
| 1     | 30,797            | 9069,810     | 233,360      | 49,9     | 52,2       | 0,68      |
| 2     | 32,733            | 9937,382     | 213,385      | 50,1     | 47,8       | 0,72      |
| Total |                   | 19036,192    | 446,745      | 100,0    | 100,0      |           |

HPLC of compound (*RS*)-**4a** (Knauer Smartline-1100, *S,S*-Whelk O1 column (250 × 4.6 mm), detection at 220 nm, 1 mL/min flow rate, *n*-hexane/*i*PrOH, 5:1):  $t_{(R)\text{-4a}} = 30.8$  min,  $t_{(S)\text{-4a}} = 32.7$  min

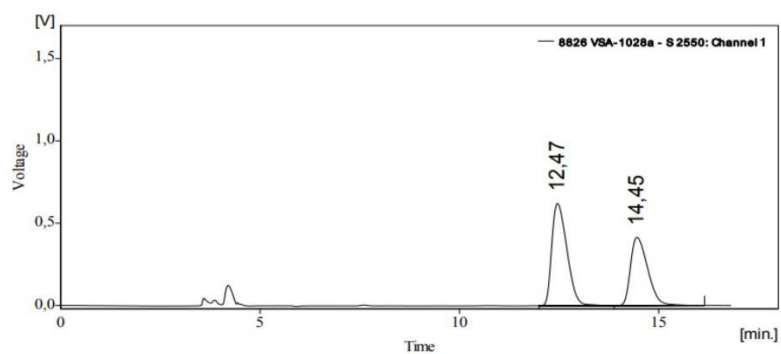

Result Table (Uncal - 8826 VSA-1028a - S 2550: Channel 1)

|       | Reten. Time [min] | Area [mAU.s] | Height [mAU] | Area [%] | Height [%] | W05 [min] |
|-------|-------------------|--------------|--------------|----------|------------|-----------|
| 1     | 12,467            | 16414,614    | 620,722      | 56,9     | 59,9       | 0,43      |
| 2     | 14,450            | 12413,546    | 414,797      | 43,1     | 40,1       | 0,48      |
| Total |                   | 28828,160    | 1035,519     | 100,0    | 100,0      |           |

HPLC of compound (*R,R*)-**3b** (Knauer Smartline-1100, Chiralcel OD-H column (250 × 4.6 mm), detection at 220 nm, 1 mL/min flow rate, *n*-hexane/*i*PrOH, 40:1):  $t_{(R,R)\text{-3b}} = 12.5$  min,  $t_{(R,S)\text{-3b}} = 14.4$  min (13.8% *de*)

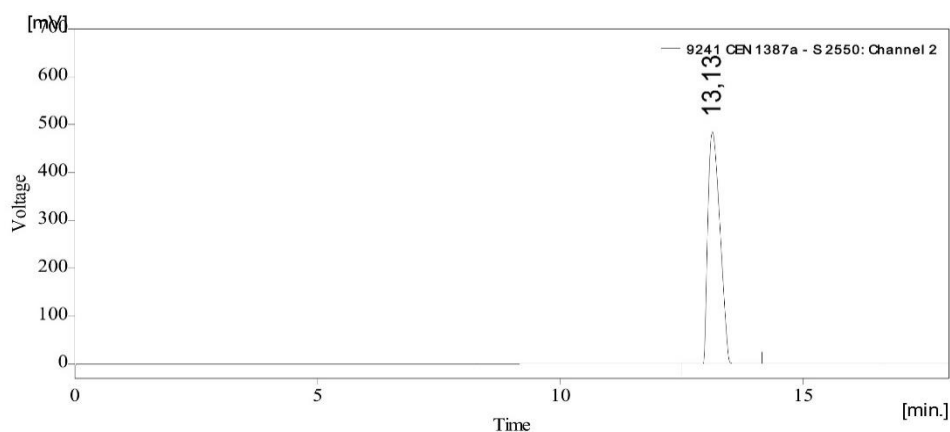

Result Table (Uncal - 9241 CEN 1387a - S 2550: Channel 2)

|       | Reten. Time [min] | Area [mAU.s] | Height [mAU] | Area [%] | Height [%] | W05 [min] |
|-------|-------------------|--------------|--------------|----------|------------|-----------|
| 1     | 13,133            | 8336,878     | 484,176      | 100,0    | 100,0      | 0,30      |
| Total |                   | 8336,878     | 484,176      | 100,0    | 100,0      |           |

HPLC of compound (*R,R*)-**3b** (Knauer Smartline-1100, Chiralcel OD-H column (250 × 4.6 mm), detection at 220 nm, 1 mL/min flow rate, *n*-hexane/*i*PrOH, 40:1):  $t_{(R,R)\text{-3b}} = 13.1$  min (>99% *de*)

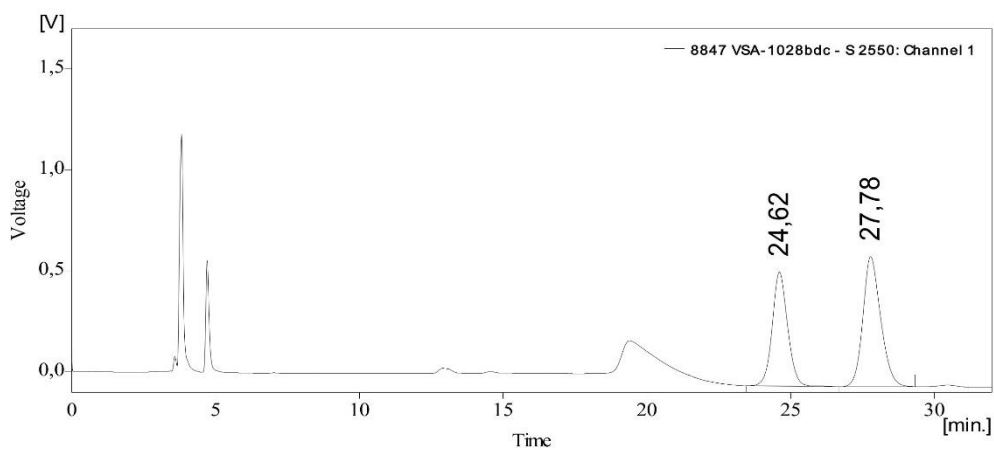

Result Table (Uncal - 8847 VSA-1028bdc - S 2550: Channel 1)

|   | Reten. Time [min] | Area [mAU.s] | Height [mAU] | Area [%] | Height [%] | W05 [min] |
|---|-------------------|--------------|--------------|----------|------------|-----------|
| 1 | 24,617            | 21052,461    | 564,752      | 43,2     | 46,7       | 0,57      |
| 2 | 27,783            | 27658,739    | 644,406      | 56,8     | 53,3       | 0,67      |
|   | Total             | 48711,200    | 1209,158     | 100,0    | 100,0      |           |

HPLC of compound (*S*)-**4b** (Knauer Smartline-1100, *S,S*-Wheik O1 column (250 × 4.6 mm), detection at 220 nm, 1 mL/min flow rate, *n*-hexane/*i*PrOH, 5:1):  $t_{(R)\text{-4b}} = 24.6$  min,  $t_{(S)\text{-4b}} = 27.8$  min (13.6% *ee*)

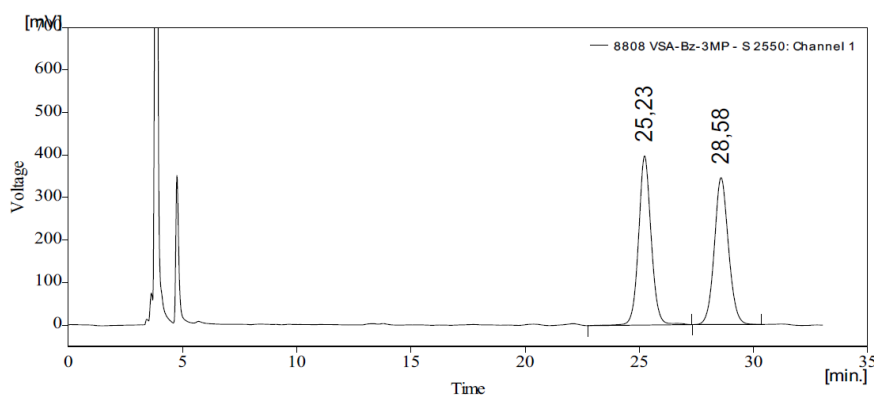

Result Table (Uncal - 8808 VSA-Bz-3MP - S 2550: Channel 1)

|   | Reten. Time [min] | Area [mAU.s] | Height [mAU] | Area [%] | Height [%] | W05 [min] |
|---|-------------------|--------------|--------------|----------|------------|-----------|
| 1 | 25,233            | 15289,863    | 398,055      | 50,6     | 53,5       | 0,58      |
| 2 | 28,583            | 14911,209    | 345,784      | 49,4     | 46,5       | 0,67      |
|   | Total             | 30201,072    | 743,838      | 100,0    | 100,0      |           |

HPLC of compound (*R*)-**4b** (Knauer Smartline-1100, *S,S*-Wheik O1 column (250 × 4.6 mm), detection at 220 nm, 1 mL/min flow rate, *n*-hexane/*i*PrOH, 5:1):  $t_{(R)\text{-4b}} = 25.2$  min,  $t_{(S)\text{-4b}} = 28.6$  min

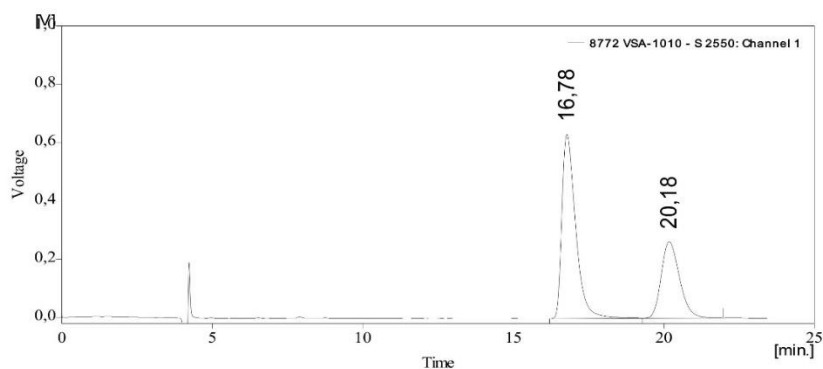

Result Table (Uncal - 8772 VSA-1010 - S 2550: Channel 1)

|       | Reten. Time [min] | Area [mAU.s] | Height [mAU] | Area [%] | Height [%] | W05 [min] |
|-------|-------------------|--------------|--------------|----------|------------|-----------|
| 1     | 16,783            | 20207,351    | 632,442      | 64,6     | 70,7       | 0,50      |
| 2     | 20,183            | 11085,685    | 262,202      | 35,4     | 29,3       | 0,67      |
| Total |                   | 31293,037    | 894,644      | 100,0    | 100,0      |           |

HPLC of compound (*R,R*)-**3c** (Knauer Smartline-1100, Chiralcel OD-H column (250 × 4.6 mm), detection at 220 nm, 1 mL/min flow rate, *n*-hexane/*i*PrOH, 40:1):  $t_{(R,R)\text{-3c}} = 16.8$  min,  $t_{(R,S)\text{-3c}} = 20.2$  min (29.2% *de*)

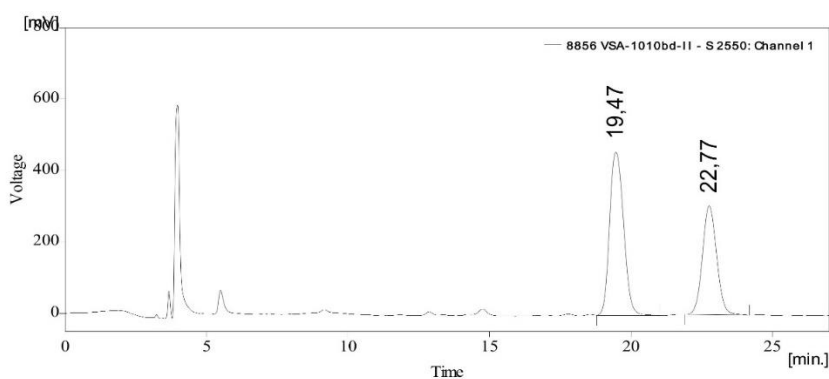

Result Table (Uncal - 8856 VSA-1010bd-II - S 2550: Channel 1)

|       | Reten. Time [min] | Area [mAU.s] | Height [mAU] | Area [%] | Height [%] | W05 [min] |
|-------|-------------------|--------------|--------------|----------|------------|-----------|
| 1     | 19,467            | 15711,668    | 456,537      | 99,7     | 60,0       | 0,55      |
| 2     | 22,767            | 10606,020    | 304,671      | 40,3     | 40,0       | 0,55      |
| Total |                   | 26317,688    | 761,208      | 100,0    | 100,0      |           |

HPLC of compound (*S*)-**4c** (Knauer Smartline-1100, *S,S*-Whelk O1 column (250 × 4.6 mm), detection at 220 nm, 1 mL/min flow rate, *n*-hexane/*i*PrOH, 10:1):  $t_{(S)\text{-4c}} = 19.5$  min,  $t_{(R)\text{-4c}} = 22.8$  min (19.4% *ee*)

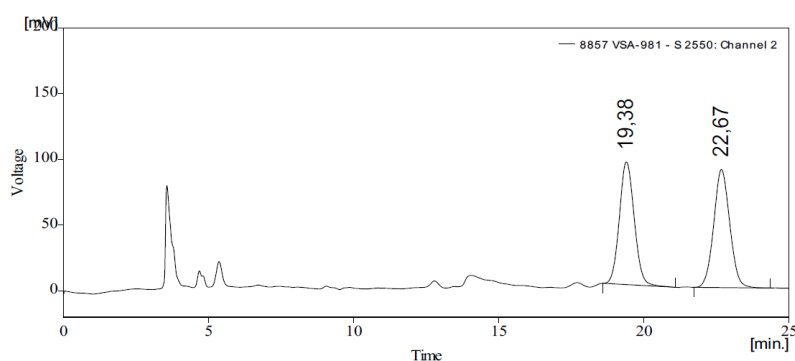

Result Table (Uncal - 8857 VSA-981 - S 2550: Channel 2)

|       | Reten. Time [min] | Area [mAU.s] | Height [mAU] | Area [%] | Height [%] | W05 [min] |
|-------|-------------------|--------------|--------------|----------|------------|-----------|
| 1     | 19,383            | 3329,883     | 93,340       | 49,1     | 50,9       | 0,57      |
| 2     | 22,667            | 3457,750     | 89,901       | 50,9     | 49,1       | 0,60      |
| Total |                   | 6787,633     | 183,241      | 100,0    | 100,0      |           |

HPLC of compound (*RS*)-**4c** (Knauer Smartline-1100, *S,S*-Whelk O1 column (250 × 4.6 mm), detection at 220 nm, 1 mL/min flow rate, *n*-hexane/*i*PrOH, 10:1):  $t_{(S)\text{-4c}} = 19.4$  min,  $t_{(R)\text{-4c}} = 22.7$  min

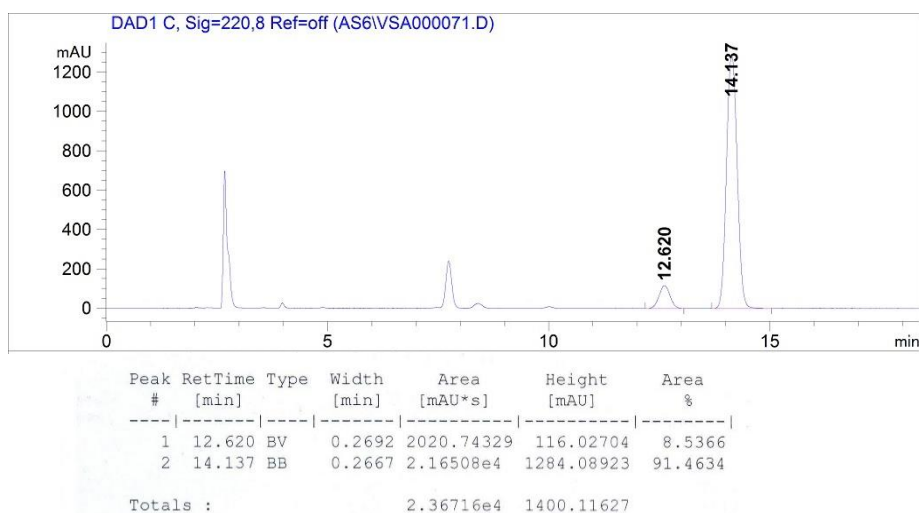

HPLC of compound (*R,R*)-**3d** (Agilent 1100, Kromasil 100-5 C18 column (250 × 4.6 mm), detection at 220 nm, 0.8 mL/min flow rate, MeCN/H<sub>2</sub>O, 55:45):  $t_{(R,S)\text{-3d}}$  = 12.6 min,  $t_{(R,R)\text{-3d}}$  = 14.1 min (82.9% *de*)

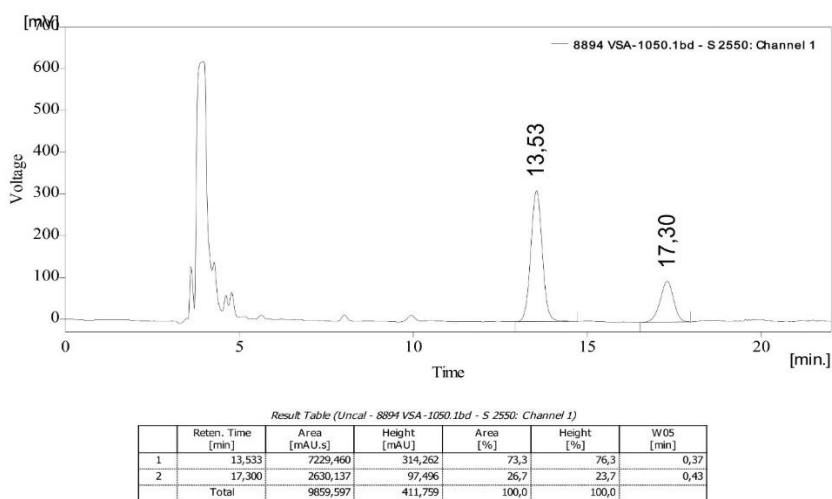

HPLC of compound (*S*)-**4d** (Knauer Smartline-1100, *S,S*-Wheik O1 column (250 × 4.6 mm), detection at 220 nm, 1 mL/min flow rate, *n*-hexane/*i*PrOH, 10:1):  $t_{(S)\text{-4d}}$  = 13.5 min,  $t_{(R)\text{-4d}}$  = 17.3 min (46.6% *ee*)

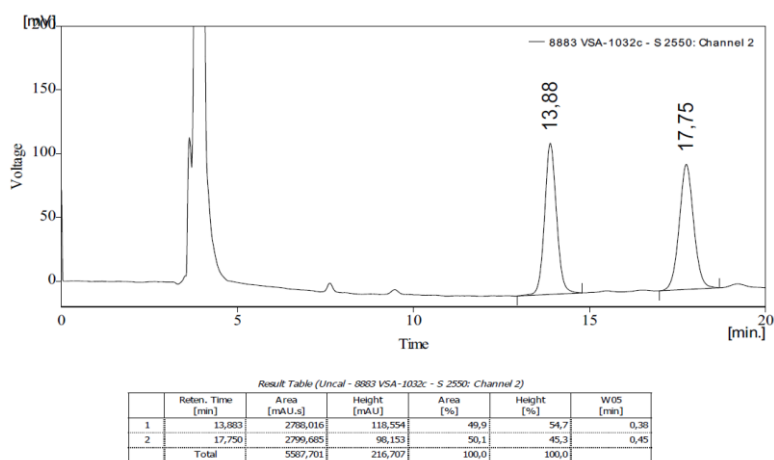

HPLC of compound (*RS*)-**4d** (Knauer Smartline-1100, *S,S*-Wheik O1 column (250 × 4.6 mm), detection at 220 nm, 1 mL/min flow rate, *n*-hexane/*i*PrOH, 10:1):  $t_{(S)\text{-4d}}$  = 13.9 min,  $t_{(R)\text{-4d}}$  = 17.8 min

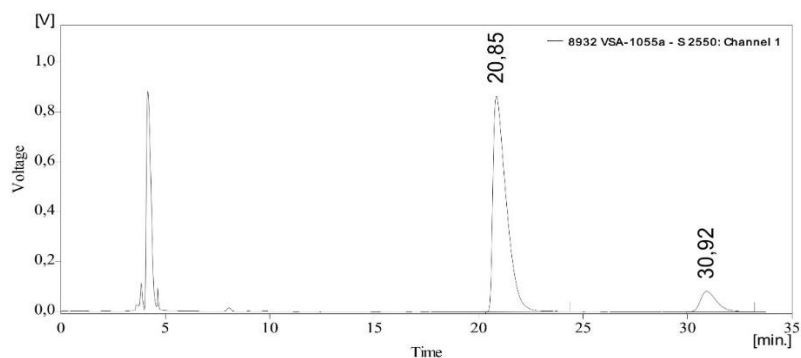

Result Table (Uncal - 8932 VSA-1055a - S 2550: Channel 1)

|       | Reten. Time [min] | Area [mAU.s] | Height [mAU] | Area [%] | Height [%] | W05 [min] |
|-------|-------------------|--------------|--------------|----------|------------|-----------|
| 1     | 20,850            | 38263,853    | 896,227      | 89,6     | 91,3       | 0,68      |
| 2     | 30,917            | 4449,195     | 82,171       | 10,4     | 8,7        | 0,83      |
| Total |                   | 42713,047    | 948,398      | 100,0    | 100,0      |           |

HPLC of compound (*R,R*)-**3e** (Knauer Smartline-1100, Chiralcel OD-H column (250 × 4.6 mm), detection at 220 nm, 1 mL/min flow rate, *n*-hexane/*i*PrOH, 40:1):  $t_{(R,R)\text{-3e}} = 20.8$  min,  $t_{(R,S)\text{-3e}} = 30.9$  min (79.2% *de*)

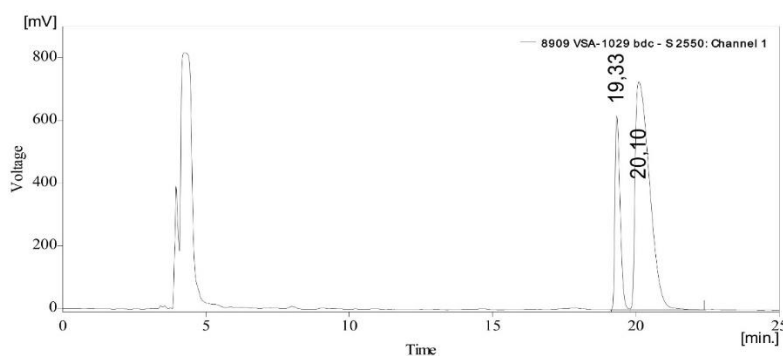

Result Table (Uncal - 8909 VSA-1029 bdc - S 2550: Channel 1)

|       | Reten. Time [min] | Area [mAU.s] | Height [mAU] | Area [%] | Height [%] | W05 [min] |
|-------|-------------------|--------------|--------------|----------|------------|-----------|
| 1     | 19,333            | 7706,474     | 617,954      | 23,4     | 45,9       | 0,22      |
| 2     | 20,100            | 25277,951    | 727,551      | 76,6     | 54,1       | 0,57      |
| Total |                   | 32984,425    | 1345,505     | 100,0    | 100,0      |           |

HPLC of compound (*S*)-**4e** (Knauer Smartline-1100, Chiralcel OD-H column (250 × 4.6 mm), detection at 220 nm, 1 mL/min flow rate, *n*-hexane/*i*PrOH/MeOH, 40:0.4:0.1):  $t_{(R)\text{-4e}} = 19.3$  min,  $t_{(S)\text{-4e}} = 20.1$  min (53.2% *ee*)

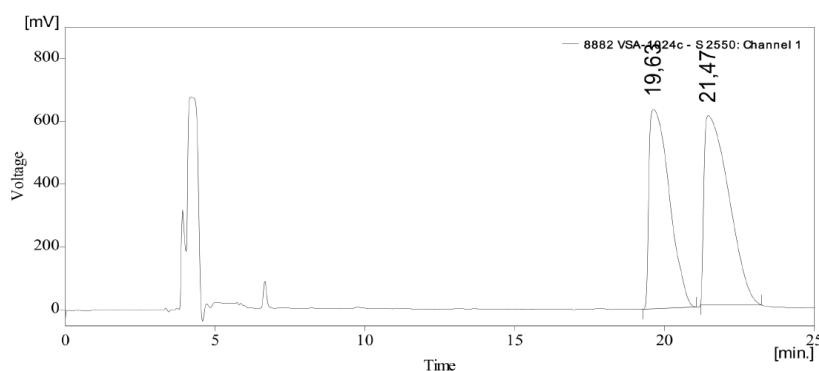

Result Table (Uncal - 8882 VSA-1024c - S 2550: Channel 1)

|       | Reten. Time [min] | Area [mAU.s] | Height [mAU] | Area [%] | Height [%] | W05 [min] |
|-------|-------------------|--------------|--------------|----------|------------|-----------|
| 1     | 19,633            | 31108,577    | 634,243      | 48,4     | 51,3       | 0,77      |
| 2     | 21,467            | 33165,148    | 601,993      | 51,6     | 48,7       | 0,97      |
| Total |                   | 64273,543    | 1236,236     | 100,0    | 100,0      |           |

HPLC of compound (*RS*)-**4e** (Knauer Smartline-1100, Chiralcel OD-H column (250 × 4.6 mm), detection at 220 nm, 1 mL/min flow rate, *n*-hexane/*i*PrOH/MeOH, 40:0.4:0.1):  $t_{(R)\text{-4e}} = 19.6$  min,  $t_{(S)\text{-4e}} = 21.5$  min

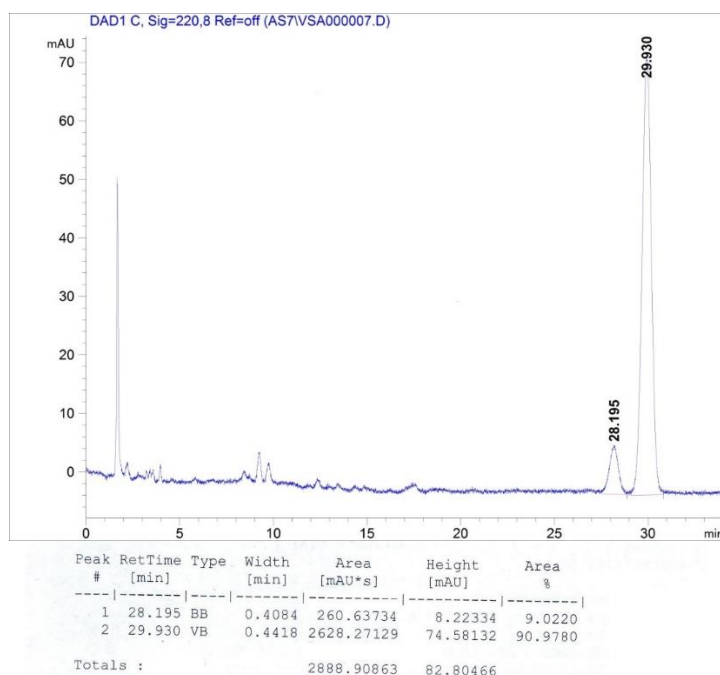

HPLC of compound (*R,R*)-**3f** (Agilent 1100, Phenomenex Luna C18(2) (250 × 4.6 mm), detection at 220 nm, 0.8 mL/min flow rate, MeCN/H<sub>2</sub>O, 48:52):  $t_{(R,S)\text{-3f}} = 28.2$  min,  $t_{(R,R)\text{-3d}} = 29.9$  min (82.0% *de*)

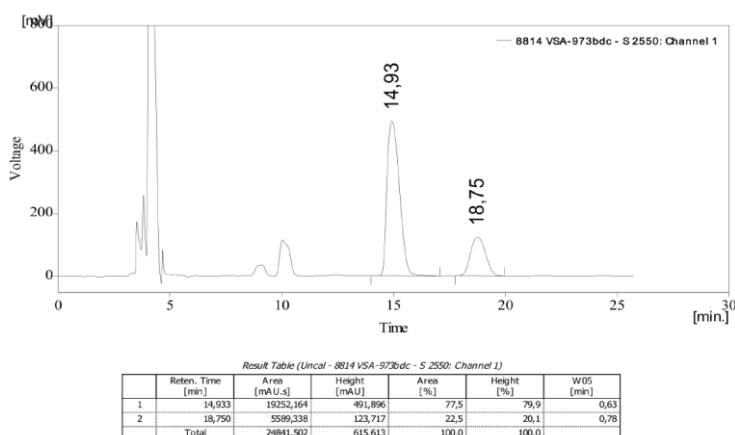

HPLC of compound (*S*)-**4f** (Knauer Smartline-1100, Chiralcel OD-H column (250 × 4.6 mm), detection at 220 nm, 1 mL/min flow rate, *n*-hexane/*i*PrOH, 40:1):  $t_{(S)\text{-4f}} = 14.9$  min,  $t_{(R)\text{-4f}} = 18.8$  min (55.0% *ee*)

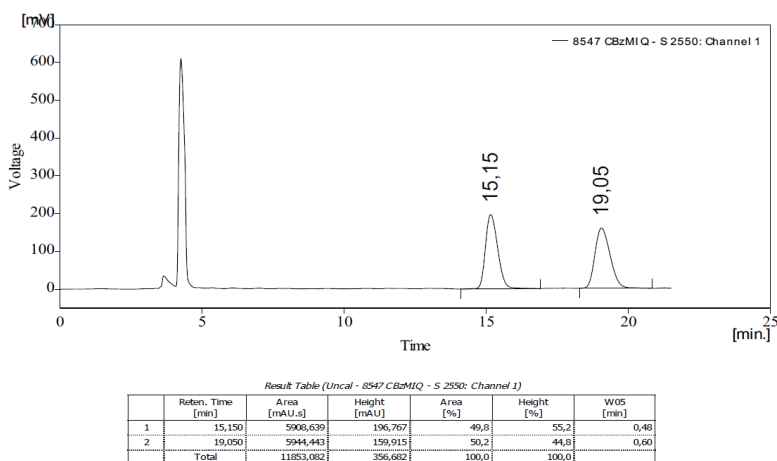

HPLC of compound (*RS*)-**4f** (Knauer Smartline-1100, Chiralcel OD-H column (250 × 4.6 mm), detection at 220 nm, 1 mL/min flow rate, *n*-hexane/*i*PrOH, 40:1):  $t_{(S)\text{-4f}} = 15.2$  min,  $t_{(R)\text{-4f}} = 19.0$  min

## Computational details

Graphic modelling and primary optimisation of the transition state (TS) geometry were performed by the Ammp and Mopac methods using the VEGA ZZ program set.<sup>S10</sup> All DFT calculations were performed using ORCA 4.0.1 program.<sup>S11</sup> The solvent effects were simulated using a conductive-type polarizable continuum model (CPCM solvation model<sup>S12</sup> in ORCA 4.0.1, CPCM version). Corrections for dispersion effects were introduced according to the semiempirical scheme of pairwise Grimme correction (D3).<sup>S13</sup>

In order to determine the reaction mechanism, D3-corrected final single point energy ( $E_{\text{FSP}}$ ) was calculated at the BLYP-D3/TZVP level of theory in  $\text{CH}_2\text{Cl}_2$  with increasing N–C(O) bond length (from TS to reagents) and separately with increasing O–C(O) bond length (from TS to products) in the **1d–2a** system (Tables S2 and S3). The geometries and energies ( $E_{\text{FSP}}$ ) of reagents, reagent complexes, TSs, and product complexes (only for **1d–2a**) were calculated using the hybrid B3LYP functional<sup>S14</sup> with the def2-SVP and def2-TZVP Ahlrich basis sets.<sup>S15</sup> At the first stage, TS search and Hessian calculations in gas phase were performed using B3LYP-D3-gCP/def2-SVP with changing length of the crucial N–CO bond. At every optimization step, single point energies  $E_{\text{FSP}}$  were calculated at the B3LYP-D3-gCP/def2-SVP level of theory using D3 and geometrical counterpoise (gCP) correction of basis set superposition error.<sup>S16</sup> Efficient numerical integration was performed with a integration grid (Grid 4). To speed up the calculation of the exchange integrals HF, the RIJCOSX<sup>S11b, S17</sup> approximation was used.

Subsequent optimization of the geometry of the ground and transition states (OptTS function), numerical calculation of vibration frequencies, and calculation of energy parameters of solvated structures were performed with the def2-TZVP basis set in a solvent (CPCM-Solvent-B3LYP-D3-gCP/def2-TZVP//B3LYP-D3-gCP/def2-SVP general level of theory). We applied very tight convergence criteria when optimizing the geometry at this stage. The total thermal energy at 253 and 293 K was calculated as the sum of the total electronic energy, nonthermal energy of zero-point vibrations, and thermal corrections for oscillatory, rotational, and transfer motion. The entropy parameter corresponding to the symmetry number  $n = 1$  was used, because all the reagents are chiral compounds.<sup>S18</sup>

The 3D structures of molecules as a result of the calculation were visualized using the ChemCraft software package.<sup>S19</sup> ChemCraft's animation of only one negative imaginary frequency has confirmed that the saddle points found in the optimization process are indeed transition states. All basic states of reagents, products, reagent complexes, and product complexes do not have negative imaginary frequencies.



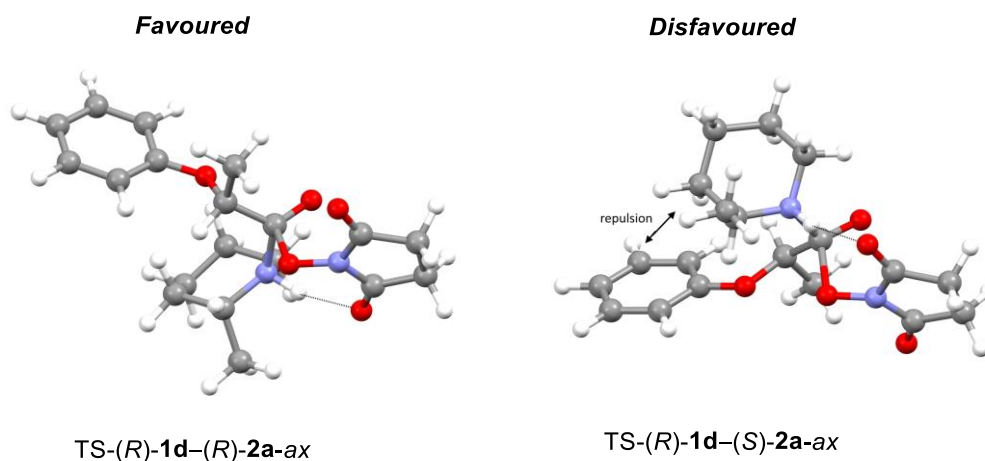

**Stereoselection:**

- Felkin-Ahn approach of N-heterocycle
- stabilisation *via* H-bonding between NH and O=C
- chiral center of amine is in the *trans*-position relative to carbonyl O atom
- axial N lone pair reacts
- non-covalent interactions between piperidine CH<sub>2</sub> and Ph of ester

**Figure S1** Schematic representation of the TS-(*R*)-**1d**-(*R*)-**2a-ax** and TS-(*R*)-**1d**-(*S*)-**2a-ax** transition states and the most important factors determining the stereoselectivity of acylation of amine **2a** with ester (*R*)-**1d**.

**Table S2** Relative total electronic energies ( $E_{rel}$ ) of the most stable conformations, TS-(*R*)-**1d**-(*R*)-**2a** and TS-(*R*)-**1d**-(*S*)-**2a**, and the corresponding relative Gibbs free energies ( $G_{rel}$ ) at 298.15 K in the gas phase at the B3LYP-D3-gCP/def2-SVP level of theory

TS-(*R*)-**1d**-(*R*)-**2a**

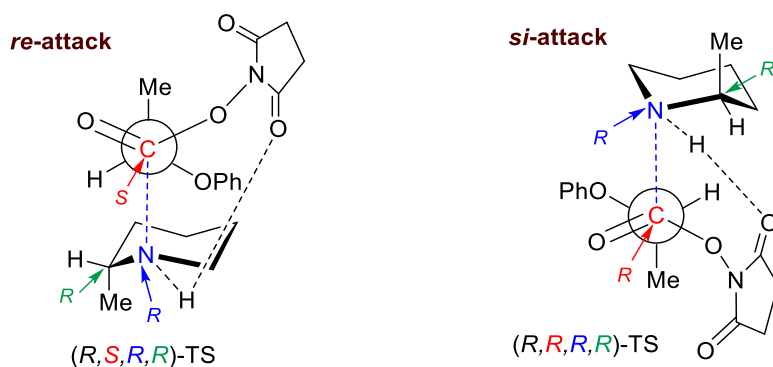

| Configuration     | DFT-optimized geometry | $E_{rel}$ , kJ/mol | $G_{rel}$ , kJ/mol |
|-------------------|------------------------|--------------------|--------------------|
| <i>R,S,R,R-ax</i> |                        | 12.56              | 11.89              |
| <i>R,S,S,R-eq</i> |                        | 17.00              | 17.16              |
| <i>R,R,R,R-ax</i> |                        | 0                  | 0                  |
| <i>R,R,S,R-eq</i> |                        | 1.07               | -1.09              |

Table S2 (continued)

## TS-(R)-1d-(S)-2a

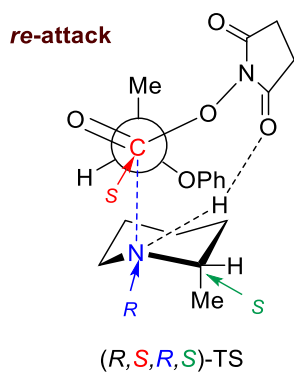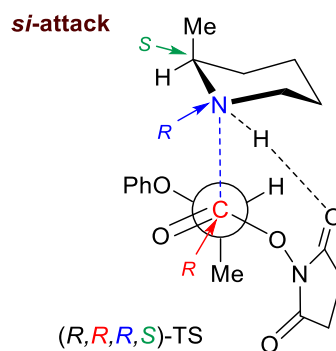

| Configuration | DFT-optimized geometry | $E_{rel}$ , kJ/mol | $G_{rel}$ , kJ/mol |
|---------------|------------------------|--------------------|--------------------|
| R,S,S,S-ax    |                        | 19.23              | 16.39              |
| R,S,R,S-eq    |                        | 0                  | 0                  |
| R,R,S,S-ax    |                        | 6.36               | 5.34               |
| R,R,R,S-eq    |                        | 6.62               | 6.46               |

**Table S3-1** Relative total electronic energies ( $E_{rel}$ ) and relative Gibbs free energies ( $G_{rel}$ ) of TS-(*R*)-**1d**--(*R*)-**2c** at 298.15 K in the gas phase at the B3LYP-D3-gCP/def2-SVP level of theory

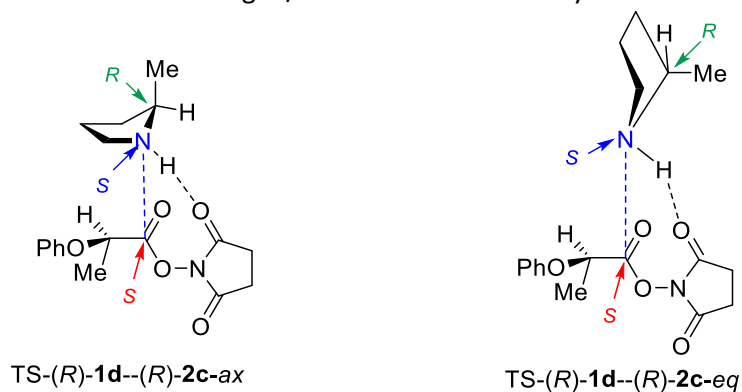

| Configuration      | Amine attack | DFT-optimized geometry                                                              | $E_{rel}$ , kJ/mol | $G_{rel}$ , kJ/mol | % in the Maxwell-Boltzmann distribution over $G$ |
|--------------------|--------------|-------------------------------------------------------------------------------------|--------------------|--------------------|--------------------------------------------------|
| <i>R,R,R,R</i> -ax | <i>si</i>    | 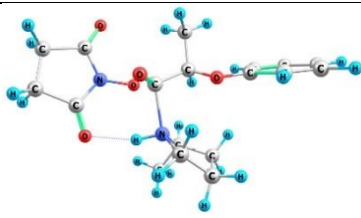   | 0                  | 0                  | 13                                               |
| <i>R,R,R,R</i> -eq | <i>si</i>    |   | -3.98              | 0.31               | 13                                               |
| <i>R,R,S,R</i> -ax | <i>si</i>    |  | 8.42               | 13.07              | 12                                               |
| <i>R,R,S,R</i> -eq | <i>si</i>    |  | 4.10               | 7.61               | 13                                               |
| <i>R,S,R,R</i> -ax | <i>re</i>    |  | 6.38               | 9.09               | 13                                               |

|                   |           |                                                                                   |       |       |    |
|-------------------|-----------|-----------------------------------------------------------------------------------|-------|-------|----|
| <i>R,S,R,R-eq</i> | <i>re</i> | 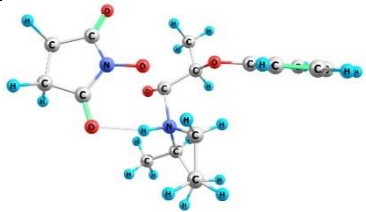 | 15.46 | 16.80 | 12 |
| <i>R,S,S,R-ax</i> | <i>re</i> |  | 23.11 | 25.73 | 12 |
| <i>R,S,S,R-eq</i> | <i>re</i> |  | 35.25 | 17.99 | 12 |

**Table S3-2** Relative total electronic energies ( $E_{rel}$ ) of TS-(*R*)-**1d**-(*S*)-**2c** at 298.15 K in the gas phase at the B3LYP-D3-gCP/def2-SVP and CPCMC-CH<sub>2</sub>Cl<sub>2</sub>-B3LYP-D3-gCP/def2-TZVP//B3LYP-D3-gCP/def2-SVP levels of theory

| Configuration     | Amine attack | DFT-optimized geometry                                                              | $E_{rel}$ , kJ/mol (def2-SVP) | $E_{rel}$ , kJ/mol (def2-TZVP) | % in the Maxwell-Boltzmann distribution over <i>G</i> |
|-------------------|--------------|-------------------------------------------------------------------------------------|-------------------------------|--------------------------------|-------------------------------------------------------|
| <i>R,S,S,S-ax</i> | <i>re</i>    | 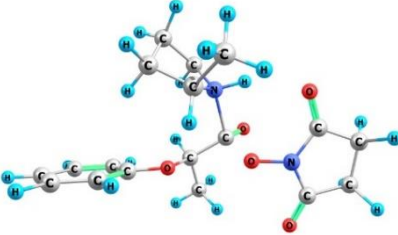 | 0                             | 0                              | 15                                                    |
| <i>R,S,S,S-eq</i> | <i>re</i>    |  | 8.51                          | -                              | 14                                                    |
| <i>R,S,R,S-ax</i> | <i>re</i>    |  | 8.59                          | -                              | 14                                                    |

|                    |                                                       |                                                                                    |      |       |    |
|--------------------|-------------------------------------------------------|------------------------------------------------------------------------------------|------|-------|----|
| <i>R,S,R,S</i> -eq | <i>re</i>                                             | 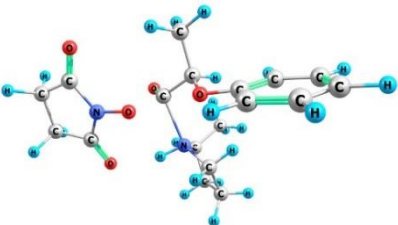  | 4.56 | 9.89  | 14 |
| <i>R,R,R,S</i> -ax | <i>si</i>                                             |   | 3.02 | -     | 14 |
| <i>R,R,R,S</i> -eq | <i>si</i>                                             |   | 8.30 | 10.78 | 14 |
| <i>R,R,S,S</i> -eq | <i>si</i>                                             |  | 0.71 | 1.05  | 15 |
| <i>R,R,S,S</i> -ax | transformed to <i>R,R,S,S</i> -eq during optimization |                                                                                    |      |       |    |

**Table S4** Calculated parameters for reagents **1d** and **2a**, reagent complexes (**RCs**), transition states (**TSs**), and product complexes (**PCs**) at 293 and 253 K in CH<sub>2</sub>Cl<sub>2</sub> at the CPCMC-CH<sub>2</sub>Cl<sub>2</sub>-B3LYP-D3-gCP/def2-TZVP//B3LYP-D3-gCP/def2-SVP level of theory (amide (*R,R*)-**3a** predominates in the reaction product; a model with axial lone electron pair at N atom of amine **2a** was used)

| Structure                        | $E_{\text{FSP}}$ , au<br>(absolute energy) | Relative energies |          |              |          |                                                                |                                                         |
|----------------------------------|--------------------------------------------|-------------------|----------|--------------|----------|----------------------------------------------------------------|---------------------------------------------------------|
|                                  |                                            | $H$ , kJ/mol      |          | $G$ , kJ/mol |          | $\Delta G^\ddagger = (G_{\text{TS}} - G_{\text{RC}})$ , kJ/mol |                                                         |
|                                  |                                            | 293 K             | 253 K    | 293 K        | 253 K    | 293 K                                                          | 253 K                                                   |
| <b>Reagents</b>                  | <b>-1225.11797982</b>                      | <b>0</b>          | <b>0</b> | <b>0</b>     | <b>0</b> |                                                                |                                                         |
| ( <i>R,R</i> )- <b>RC</b>        | -1225.13101149                             | -24.52            | -25.39   | 26.82        | 19.12    |                                                                |                                                         |
| ( <i>R,R</i> )- <b>TS</b>        | -1225.12184009                             | 0.58              | 0.16     | 62.21        | 53.59    | 35.39                                                          | 34.47                                                   |
| ( <i>R,R</i> )- <b>PC</b>        | -1225.14688399                             | -65.80            | -66.43   | -7.35        | -15.80   |                                                                |                                                         |
| ( <i>R,R</i> )- <b>3a</b> + SuOH | -1225.14245242                             | -58.41            | -58.82   | -59.91       | -59.61   |                                                                |                                                         |
| ( <i>R,S</i> )- <b>RC</b>        | -1225.12946470                             | -23.92            | -24.48   | 29.50        | 21.54    |                                                                |                                                         |
| ( <i>R,S</i> )- <b>TS</b>        | -1225.11718826                             | 11.36             | 10.35    | 71.77        | 63.27    | 42.27                                                          | 41.73                                                   |
| ( <i>R,S</i> )- <b>PC</b>        | -1225.15520091                             | -86.17            | -87.08   | -32.70       | -40.68   |                                                                |                                                         |
| ( <i>R,S</i> )- <b>3a</b> + SuOH | -1225.14349455                             | -61.55            | -61.98   | -62.64       | -62.32   |                                                                |                                                         |
|                                  |                                            |                   |          |              |          | $\Delta\Delta G^\ddagger = 6.88$<br>kJ/mol <sup>a</sup>        | $\Delta\Delta G^\ddagger = 7.26$<br>kJ/mol <sup>b</sup> |

<sup>a</sup> Experimental  $\Delta\Delta G^\ddagger_{293} = 6.90$  kJ/mol. <sup>b</sup> Experimental  $\Delta\Delta G^\ddagger_{253} = 7.29$  kJ/mol

**Table S5-1** Calculated parameters for reagent complexes (**RCs**) and transition states (**TSs**) for reaction of reagents **1d** and **2c** at 293 and 253 K in CH<sub>2</sub>Cl<sub>2</sub> at the CPCMC-CH<sub>2</sub>Cl<sub>2</sub>-B3LYP-D3-gCP/def2-TZVP//B3LYP-D3-gCP/def2-SVP level of theory (amide (*R,R*)-**3d** predominates in the reaction product; a model with axial lone electron pair at N atom of amine **2d** was used)

| Structure                 | $E_{\text{FSP}}$ , au<br>(absolute energy) | Relative energies |          |              |          |                                                                |                                                  |
|---------------------------|--------------------------------------------|-------------------|----------|--------------|----------|----------------------------------------------------------------|--------------------------------------------------|
|                           |                                            | $H$ , kJ/mol      |          | $G$ , kJ/mol |          | $\Delta G^\ddagger = (G_{\text{TS}} - G_{\text{RC}})$ , kJ/mol |                                                  |
|                           |                                            | 293 K             | 253 K    | 293 K        | 253 K    | 293 K                                                          | 253 K                                            |
| <b>Reagents</b>           | <b>-1185.809531412</b>                     | <b>0</b>          | <b>0</b> | <b>0</b>     | <b>0</b> |                                                                |                                                  |
| ( <i>R,R</i> )- <b>RC</b> | -1185.82353409                             | -30.10            | -30.69   | 24.17        | 16.26    |                                                                |                                                  |
| ( <i>R,R</i> )- <b>TS</b> | -1185.81835826                             | -14.64            | -15.08   | 43.62        | 35.42    | 19.45                                                          | 19.16                                            |
| ( <i>R,S</i> )- <b>RC</b> | -1185.82140198                             | -24.48            | -25.03   | 31.25        | 23.08    |                                                                |                                                  |
| ( <i>R,S</i> )- <b>TS</b> | -1185.81668056                             | -12.05            | -12.15   | 52.61        | 43.68    | 21.36                                                          | 20.60                                            |
|                           |                                            |                   |          |              |          | $\Delta\Delta G^\ddagger = 1.91$<br>kJ/mol                     | $\Delta\Delta G^\ddagger_{253} = 1.44$<br>kJ/mol |

**Table S5-2** Calculated parameters for reagent complexes (**RCs**) and transition states (**TSs**) for reaction of reagents **1d** and **2c** at 233 in toluene at the CPCMC-Solvent-B3LYP-D3-gCP/def2-TZVP//B3LYP-D3-gCP/def2-SVP level of theory (amide (*R,R*)-**3d** predominates in the reaction product; a model with axial lone electron pair at N atom of amine **2d** was used)

| Structure                 | $E_{\text{FSP}}$ , au<br>(absolute energy) | Relative energies |              |                                                                |
|---------------------------|--------------------------------------------|-------------------|--------------|----------------------------------------------------------------|
|                           |                                            | $H$ , kJ/mol      | $G$ , kJ/mol | $\Delta G^\ddagger = (G_{\text{TS}} - G_{\text{RC}})$ , kJ/mol |
|                           |                                            |                   |              |                                                                |
| <b>Reagents</b>           | <b>-1185.79866461</b>                      | <b>0</b>          | <b>0</b>     |                                                                |
| ( <i>R,R</i> )- <b>RC</b> | -1185.81465952                             | -36.25            | 3.81         |                                                                |
| ( <i>R,R</i> )- <b>TS</b> | -1185.80871950                             | -19.64            | 27.84        | 24.03                                                          |
| ( <i>R,S</i> )- <b>RC</b> | -1185.81263965                             | -33.32            | 8.24         |                                                                |
| ( <i>R,S</i> )- <b>TS</b> | -1185.80565837                             | -10.29            | 33.33        | 25.09                                                          |
|                           |                                            |                   |              | $\Delta\Delta G^\ddagger = 1.06$ kJ/mol <sup>a</sup>           |

<sup>a</sup> Experimental  $\Delta\Delta G^\ddagger_{233} = 1.53$  kJ/mol.

**Table S6-1** Important geometry parameters of transition states in the reactions of ester (*R*)-**1d** with (*R*)- and (*S*)-enantiomers of amines **2a** and **2c**

| Amine     | Configuration of TS                                 | Bond length, Å |        |       | Bond angle, deg. |       |          |
|-----------|-----------------------------------------------------|----------------|--------|-------|------------------|-------|----------|
|           |                                                     | N–C(O)         | O–C(O) | NH⋯ON | N–C=O            | O–C=O | N–C(O)–O |
| <b>2a</b> | TS-( <i>R</i> )- <b>1d</b> -( <i>S</i> )- <b>2a</b> | 1.765          | 1.784  | 2.242 | 109.7            | 112.6 | 92.5     |
|           | TS-( <i>R</i> )- <b>1d</b> -( <i>R</i> )- <b>2a</b> | 1.640          | 1.803  | 2.269 | 112.5            | 110.9 | 92.7     |
| <b>2c</b> | TS-( <i>R</i> )- <b>1d</b> -( <i>S</i> )- <b>2c</b> | 1.867          | 1.515  | 2.106 | 106.2            | 117.4 | 95.9     |
|           | TS-( <i>R</i> )- <b>1d</b> -( <i>R</i> )- <b>2c</b> | 1.916          | 1.511  | 1.936 | 106.9            | 117.9 | 94.4     |

**Table S6-2** Important geometry parameters of transition states in the reactions of ester (*R*)-**1d** with (*R*)- and (*S*)-enantiomers of amine **2a**

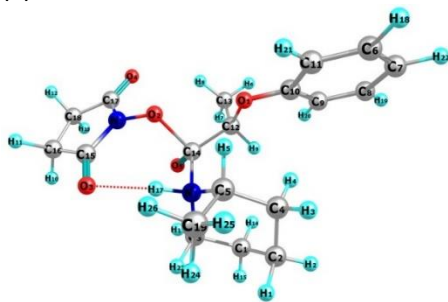

TS-(*R*)-**1d**-(*S*)-**2a**

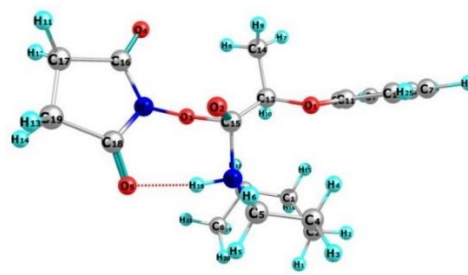

TS-(*R*)-**1d**-(*R*)-**2a**

| Configuration of TS                                 | Dihedral angles, deg. |               |               |                |              |
|-----------------------------------------------------|-----------------------|---------------|---------------|----------------|--------------|
| TS-( <i>R</i> )- <b>1d</b> -( <i>S</i> )- <b>2a</b> | N1–C14–C12–O1         | O1–C13–C14–O2 | C*5–N1–C14–O5 | C13–C12–C14–N1 | N2–O2–C14–N1 |
|                                                     | –55.6                 | 42.7          | 167.6         | –178.6         | 92.6         |
| TS-( <i>R</i> )- <b>1d</b> -( <i>R</i> )- <b>2a</b> | N1–C15–C13–O1         | O1–C13–C15–O2 | C*3–N1–C15–O2 | C14–C13–C15–N1 | N2–O3–C15–N1 |
|                                                     | –74.0                 | –170.7        | 178.9         | 167.3          | 105.3        |

**Table S7-1** Dependence of D3-corrected final single point energy ( $E_{\text{FSP}}$ ) on the N–CO bond length in (*R*)-**1d**–(*R*)-**2a** system (scanning “from TS to reagents”) at the CPCMC-CH<sub>2</sub>Cl<sub>2</sub>-B3LYP-D3/def2-TZVP level of theory

| N–CO bond length, Å | $E_{\text{FSP}}$ , Hartree |
|---------------------|----------------------------|
| 1.6400              | –1225.1590683              |
| 1.7053              | –1225.1593357              |
| 1.7705              | –1225.1596705              |
| 1.8358              | –1225.1596903              |
| 1.9010              | –1225.1597437              |
| 1.9663              | –1225.1601722              |
| 2.0316              | –1225.1608191              |
| 2.0968              | –1225.1614237              |
| 2.1933              | –1225.1618141              |
| 2.2867              | –1225.1629472              |
| 2.3800              | –1225.1639306              |
| 2.4733              | –1225.1648976              |
| 2.5667              | –1225.1657655              |
| 2.6600              | –1225.1664394              |
| 2.7533              | –1225.1667160              |
| 2.8467              | –1225.1668916              |
| 2.9400              | –1225.1664418              |
| 3.0333              | –1225.1666570              |

**Table S7-2** Dependence of D3-corrected final single point energy ( $E_{\text{FSP}}$ ) on the O–CO bond length in (*R*)-**1d**–(*R*)-**2a** system (scanning “from TS to products”) at the CPCMC-CH<sub>2</sub>Cl<sub>2</sub>-B3LYP-D3/def2-TZVP level of theory

| O–CO bond length, Å | $E_{\text{FSP}}$ , Hartree |
|---------------------|----------------------------|
| 1.803               | –1225.1590683              |
| 2.000               | –1225.160804               |
| 3.123               | –1225.1822408              |
| 3.311               | –1225.182144               |



### Simulation of the acylation reaction of amine **2a** with ester (*R*)-**1d** proceeding by a plausible two-step mechanism *via* acyl ammonium salt

We performed the simulation of the acylation of amine **2a** with activated ester (*R*)-**1d** at the CPCMC-CH<sub>2</sub>Cl<sub>2</sub>-B3LYP-D3-gCP/def2-TZVP//B3LYP-D3-gCP/def2-SVP level of theory in accordance with a plausible two-step pathway involving the formation of an acyl ammonium salt (**AAS**) (Scheme S1). The formation of **AAS** proceeds through the **TS1** transition state followed by transformation of **AAS** into the reaction products through the **TS2** deprotonation transition state. This mechanism was calculated for structures with an equatorial lone electron pair at the amine nitrogen atom and the *trans*-position of proton at the amine N atom and the methyl group at the amine chiral center. The methyl group at the amine chiral center precisely in this conformation minimally interferes the deprotonation of the amine N atom from the carbonyl oxygen atom of the succinimide group in the (*R,S,R,S*)- and (*R,R,S,R*)-TSs.

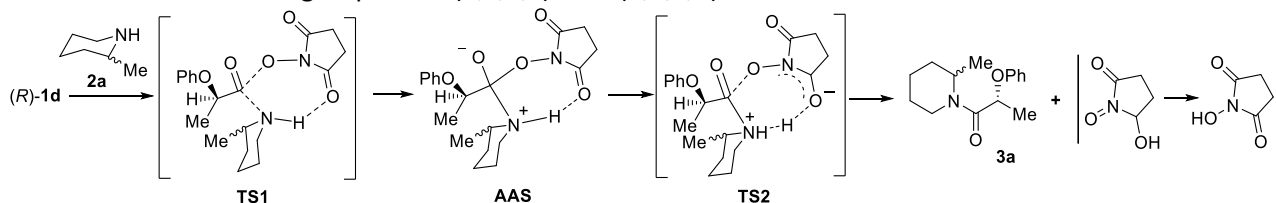

**Scheme S1** Plausible two-step pathway for acylation of amine **2a** with ester (*R*)-**1d**

Structures (*R,S*)-**AAS**, (*R,R*)-**AAS**, as well as (*R,S*)-**TS2** and (*R,R*)-**TS2** according to the results of DFT calculations at the CPCMC-CH<sub>2</sub>Cl<sub>2</sub>-B3LYP-D3-gCP/def2-TZVP//B3LYP-D3-gCP/def2-SVP level of theory are shown in Figure S2; calculated reaction coordinate, in Figure S3.

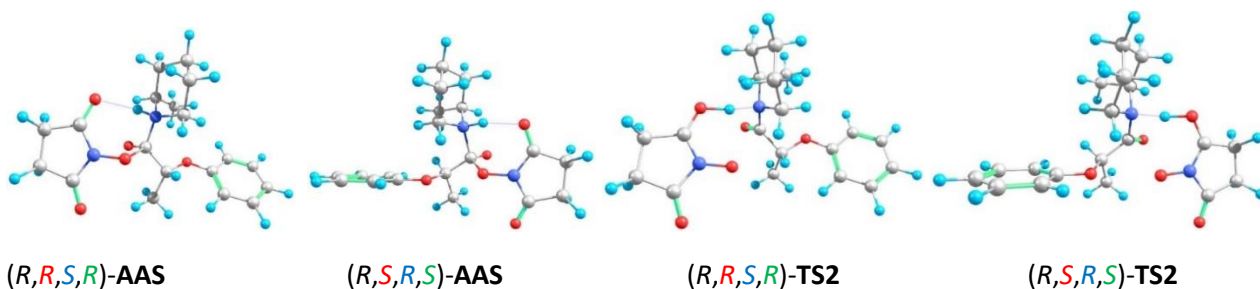

**Figure S2** Structures (*R,S*)-**AAS**, (*R,R*)-**AAS**, (*R,S*)-**TS2**, and (*R,R*)-**TS2** in the acylation of amine **2a** with ester (*R*)-**1d** *via* two-stage mechanism (CPCMC-CH<sub>2</sub>Cl<sub>2</sub>-B3LYP-D3-gCP/def2-TZVP//B3LYP-D3-gCP/def2-SVP level of theory).

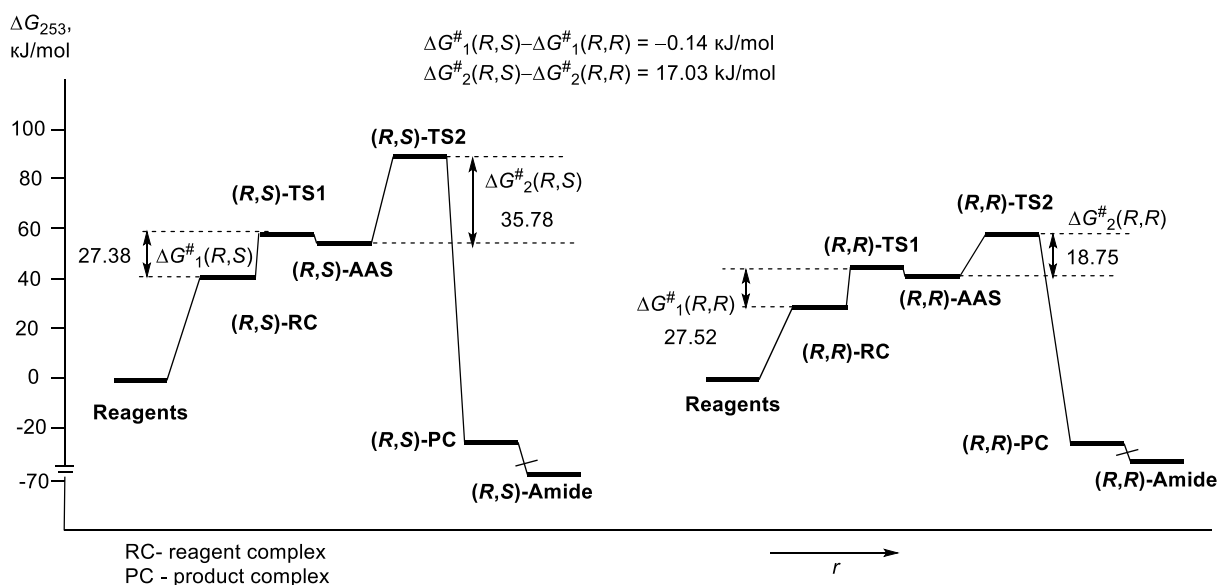

**Figure S3** Reaction coordinate (*r*) for the acylation of amine **2a** with ester (*R*)-**1d** in CH<sub>2</sub>Cl<sub>2</sub> at -20 °C *via* a two-step pathway.

The calculated value of  $\Delta\Delta G^{\#}_1$  for the first step is  $-0.14$  kJ/mol ( $(R,S)$ -amide predominates), which qualitatively and quantitatively disagrees with the experimentally observed value ( $6.9$  kJ/mol) derived from the experimental selectivity factor  $s$  ( $(R,R)$ -amide predominates); the calculated value of  $\Delta\Delta G^{\#}_2$  for the proton transfer reaction ( $17.03$  kJ/mol,  $(R,R)$ -amide predominates) is significantly higher than the experimentally observed one (see Figure S3). Since the calculated values of  $\Delta\Delta G^{\#}_1$  and  $\Delta\Delta G^{\#}_2$  do not agree with the experimental data (see Table S8), it can be assumed that the two-stage mechanism of acylation of aliphatic amines with activated ester ( $R$ )-**1d** involving the formation of a zwitterionic intermediate does not take place or is realized to an insignificant extent.

**Table S8** Calculated Gibbs free energies ( $\Delta G^{\#}_{R,R}$ ) for the fast-reacting ( $R$ )-enantiomer of amines **2a,c** and the differences in the Gibbs free energies of activation for enantiomers of amines **2a,c** ( $\Delta\Delta G^{\#}_{253}$ ) with equatorial and axial conformation of the lone electron pair at the CPCMC-CH<sub>2</sub>Cl<sub>2</sub>-B3LYP-D3-gCP/def2-TZVP//B3LYP-D3-gCP/def2-SVP and CPCMC-Toluene-B3LYP-D3-gCP/def2-TZVP//B3LYP-D3-gCP/def2-SVP levels of theory in comparison with experimental values for the reactions of ester ( $R$ )-**1d** with amines **2a,c** at 253 K.

| Amine     | Calculated                                           |                                |                                      |                   | Experimental                                       |                                                   |  |
|-----------|------------------------------------------------------|--------------------------------|--------------------------------------|-------------------|----------------------------------------------------|---------------------------------------------------|--|
|           | Conformation of N lone electron pair                 | $\Delta G^{\#}_{R,R}$ , kJ/mol | $\Delta\Delta G^{\#}_{253}$ , kJ/mol | $S_{\text{calc}}$ | $S_{\text{exp}}$                                   | $\Delta\Delta G^{\#}_{253}$ , kJ/mol <sup>a</sup> |  |
| <b>2a</b> | <i>axial</i>                                         | 34.47                          | 7.26                                 | 31.6              | 32<br>(CH <sub>2</sub> Cl <sub>2</sub> , $-20$ °C) | 7.29                                              |  |
|           | <i>equatorial</i>                                    | 27.52                          | 0.14<br>( $R,S$ ) predominates       | 1.08              |                                                    |                                                   |  |
| <b>2c</b> | <i>axial</i> (toluene)                               | 24.03                          | 1.06                                 | 1.73              | 2.2<br>(toluene, $-40$ °C)                         | 1.53 <sup>b</sup>                                 |  |
|           | <i>axial</i> (CH <sub>2</sub> Cl <sub>2</sub> )      | 19.16                          | 1.44                                 | 1.98              |                                                    |                                                   |  |
|           | <i>equatorial</i> (CH <sub>2</sub> Cl <sub>2</sub> ) | 30.05                          | 4.95                                 | 10.5              |                                                    |                                                   |  |

<sup>a</sup>  $\Delta\Delta G^{\#}_{\text{exp}} = -RT \ln s$ . <sup>b</sup>  $\Delta\Delta G^{\#}_{233}$

Cartesian coordinates of reagents, products, reagent complexes (RCs), transitions states (TSs), product complexes (PCs) at the CPCMC-CH<sub>2</sub>Cl<sub>2</sub>-B3LYP-D3-gCP/def2-TZVP//B3LYP-D3-gCP/def2-SVP level of theory; *Et* is the total thermal energy, *H* and *G* are enthalpies and Gibbs free energies at 293 or 253 K (absolute energies, Hartree). The other solvents and temperatures are specially indicated.

Amine **2a** Me-ax, :N-ax

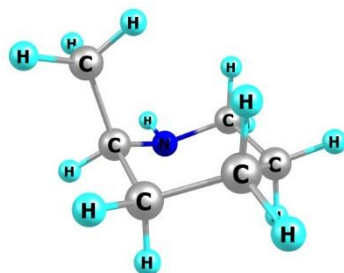

$E_{FSP} = -291.14536375$

$Et_{293} = -290.952743$ ,  $H_{293} = -290.951315$

$G_{293} = -290.989169$

$Et_{253} = -290.954354$ ,  $H_{253} = -290.953552$

$G_{253} = -290.984213$

Imaginary frequency = 0

|   |             |              |              |
|---|-------------|--------------|--------------|
| C | 1.136329    | -0.833754    | -1.230042000 |
| C | 0.465492000 | -1.981913000 | -0.467067000 |
| H | 0.301686    | -2.832529    | -1.137594    |
| H | 1.127956    | -2.338481    | 0.327200     |
| C | 0.212035    | -0.204478    | -2.282931    |
| C | -0.874263   | -1.525863    | 0.119958     |
| H | -1.396337   | -2.363133    | 0.592809     |
| H | -0.693733   | -0.773827    | 0.896718     |
| C | -1.759157   | -0.912211    | -0.962723    |
| H | -2.072940   | -1.706632    | -1.659265    |
| H | -2.669734   | -0.500447    | -0.518279    |
| N | -1.052981   | 0.185854     | -1.633225    |
| C | 0.033380    | -1.092816    | -3.523112    |
| H | 1.421288    | -0.054092    | -0.515820    |
| H | 2.054476    | -1.180208    | -1.713385    |
| H | 0.679555    | 0.726755     | -2.620611    |
| H | -1.665238   | 0.613787     | -2.319345    |
| H | 1.000457    | -1.284403    | -3.997419    |
| H | -0.417396   | -2.058201    | -3.282769    |
| H | -0.608621   | -0.594733    | -4.255689    |

Ester **1d**

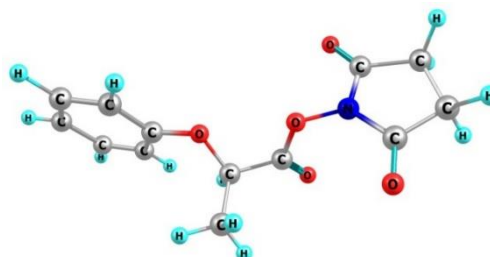

$E_{FSP} = -933.97261607$

$Et_{293} = -933.711355$ ,  $H_{293} = -933.710427$

$G_{293} = -933.769423$

$Et_{253} = -933.714998$ ,  $H_{253} = -933.714197$

$G_{253} = -933.761989$

Imaginary frequency = 0

|   |           |           |           |
|---|-----------|-----------|-----------|
| C | -4.053044 | 5.850957  | -0.228993 |
| C | -4.300250 | 6.309744  | 1.059711  |
| C | -4.284385 | 5.406378  | 2.120627  |
| C | -4.022617 | 4.062289  | 1.893856  |
| C | -3.765664 | 3.612313  | 0.599437  |
| C | -3.783240 | 4.506217  | -0.470135 |
| O | -3.450194 | 2.277241  | 0.487417  |
| C | -3.765590 | 1.598227  | -0.722180 |
| H | -3.550847 | 2.214885  | -1.594398 |
| C | -5.226775 | 1.144504  | -0.728857 |
| H | -5.412354 | 0.449971  | 0.091596  |
| H | -5.868328 | 2.018376  | -0.604114 |
| H | -5.470422 | 0.657053  | -1.674379 |
| C | -2.865157 | 0.388842  | -0.869169 |
| O | -2.468549 | -0.090768 | 0.363797  |
| N | -1.714920 | -1.237708 | 0.289368  |
| C | -2.297003 | -2.493668 | 0.137544  |
| C | -1.154498 | -3.482009 | 0.158376  |
| H | -1.360617 | -4.244073 | 0.909893  |
| H | -1.117726 | -3.974056 | -0.815137 |
| O | -3.480227 | -2.683104 | 0.011800  |
| C | -0.333222 | -1.209718 | 0.462073  |
| C | 0.109985  | -2.655589 | 0.451403  |
| H | 0.893010  | -2.781882 | -0.295870 |
| H | 0.541058  | -2.884599 | 1.427817  |
| O | 0.318123  | -0.204898 | 0.596631  |
| O | -2.580831 | -0.132294 | -1.905183 |
| H | -4.060190 | 6.542484  | -1.063016 |
| H | -4.483820 | 5.748536  | 3.129035  |
| H | -4.011977 | 3.346367  | 2.706333  |
| H | -3.577008 | 4.183815  | -1.480980 |
| H | -4.508350 | 7.357651  | 1.236259  |

Amine **2c**, Me-ax, :N-ax

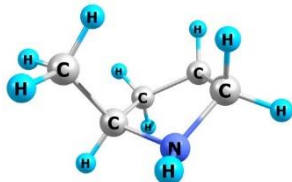

$E_{FSP} = -251.83691534$

$Et_{293} = -251.674174, H_{293} = -251.673246$

$G_{293} = -251.709069$

$Et_{253} = -251.675524, H_{253} = -251.674722$

$G_{253} = -251.704331$

Imaginary frequency = 0

|   |           |           |           |
|---|-----------|-----------|-----------|
| C | 1.060360  | -0.136028 | -2.852829 |
| C | -0.317325 | 0.565314  | -2.811690 |
| C | 1.297668  | -0.637087 | -1.403420 |
| H | 1.637058  | -1.673799 | -1.362919 |
| H | 2.054741  | -0.023219 | -0.912234 |
| C | -0.054940 | -0.452112 | -0.697308 |
| H | 0.088627  | -0.223349 | 0.363280  |
| N | -0.584812 | 0.743713  | -1.375754 |
| H | 1.845750  | 0.556298  | -3.159441 |
| H | 1.059203  | -0.957266 | -3.571162 |
| H | -0.314745 | 1.533469  | -3.317607 |
| H | -1.574624 | 0.869914  | -1.192105 |
| H | -1.072643 | -0.058787 | -3.307929 |
| C | -0.959458 | -1.684961 | -0.814943 |
| H | -1.112013 | -1.975130 | -1.858904 |
| H | -0.519657 | -2.538800 | -0.291146 |
| H | -1.939018 | -1.483946 | -0.371239 |

Ester **1d** in toluene at 233 K

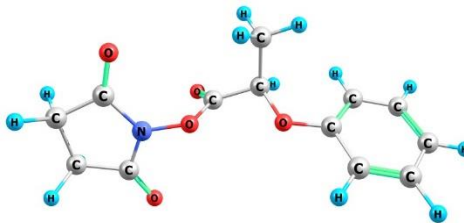

$E_{FSP} = -933.96379236$

$Et_{233} = -933.707522, H_{233} = -933.706784$

$G_{233} = -933.748536$

Imaginary frequency = 0

|   |           |           |           |
|---|-----------|-----------|-----------|
| C | -4.603575 | 5.763614  | -0.173059 |
| C | -4.458331 | 6.318376  | 1.090530  |
| C | -3.986364 | 5.521881  | 2.132682  |
| C | -3.655971 | 4.194386  | 1.910501  |
| C | -3.795958 | 3.646314  | 0.634564  |
| C | -4.279046 | 4.429528  | -0.411944 |
| O | -3.420876 | 2.332731  | 0.520854  |
| C | -3.569836 | 1.679933  | -0.731398 |
| H | -3.292375 | 2.344179  | -1.551516 |
| C | -4.987465 | 1.130557  | -0.913646 |
| H | -5.208355 | 0.404911  | -0.130174 |
| H | -5.705330 | 1.948518  | -0.848339 |
| H | -5.087738 | 0.643707  | -1.885347 |
| C | -2.584526 | 0.530026  | -0.805541 |
| O | -2.468281 | -0.096735 | 0.423152  |
| N | -1.752622 | -1.266251 | 0.359802  |
| C | -2.373858 | -2.465872 | 0.024000  |
| C | -1.301620 | -3.529514 | 0.134669  |
| H | -1.605416 | -4.240238 | 0.904843  |
| H | -1.245241 | -4.069970 | -0.810335 |
| O | -3.533076 | -2.570260 | -0.281390 |
| C | -0.387958 | -1.321722 | 0.638157  |
| C | -0.002772 | -2.780257 | 0.488664  |
| H | 0.753020  | -2.852473 | -0.294687 |
| H | 0.454856  | -3.118542 | 1.418864  |
| O | 0.294816  | -0.377107 | 0.928880  |
| O | -2.038027 | 0.150591  | -1.795027 |
| H | -4.975144 | 6.365993  | -0.993255 |
| H | -3.873022 | 5.938999  | 3.126022  |
| H | -3.284714 | 3.563829  | 2.708440  |
| H | -4.413053 | 4.027821  | -1.405701 |
| H | -4.717773 | 7.354533  | 1.267298  |

### N-Hydroxysuccinimide

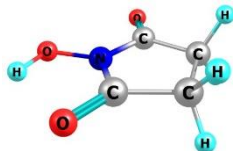

$E_{FSP} = -435.81534699$

$Et_{293} = -435.713609, H_{293} = -435.712682$

$G_{293} = -435.751358$

$Et_{253} = -435.715139, H_{253} = -435.714339$

$G_{253} = -435.746243$

Imaginary frequency = 0

|   |          |           |          |
|---|----------|-----------|----------|
| O | 2.953702 | -0.068657 | 3.455796 |
| N | 4.115305 | -0.760629 | 3.228048 |
| C | 5.288467 | -0.478550 | 3.902397 |
| C | 6.315638 | -1.460897 | 3.372878 |
| O | 5.412286 | 0.386284  | 4.737963 |
| C | 4.153213 | -1.822496 | 2.353875 |
| C | 5.569637 | -2.338665 | 2.352249 |
| O | 3.166944 | -2.191105 | 1.747195 |
| H | 2.315717 | -0.501064 | 2.853018 |
| H | 6.717019 | -2.034142 | 4.209947 |
| H | 7.137115 | -0.898441 | 2.926921 |
| H | 5.565676 | -3.395583 | 2.624260 |
| H | 5.974520 | -2.250259 | 1.342544 |

### Amine **2c**, Me-ax, :N-ax in toluene at 233 K

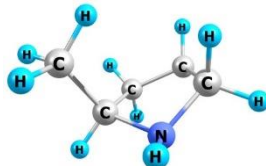

$E_{FSP} = -251.83487225$

$Et_{233} = -251.673892, H_{233} = -251.673154$

$G_{233} = -251.698993$

Imaginary frequency = 0

|   |           |           |           |
|---|-----------|-----------|-----------|
| C | 1.060715  | -0.134978 | -2.853192 |
| C | -0.317805 | 0.564849  | -2.813367 |
| C | 1.296172  | -0.637979 | -1.404220 |
| H | 1.635735  | -1.674726 | -1.364532 |
| H | 2.052285  | -0.024592 | -0.911732 |
| C | -0.056945 | -0.452543 | -0.698669 |
| H | 0.087366  | -0.220075 | 0.361073  |
| N | -0.584858 | 0.739486  | -1.379565 |
| H | 1.845500  | 0.559135  | -3.156638 |
| H | 1.063388  | -0.954505 | -3.573572 |
| H | -0.314523 | 1.534576  | -3.316231 |
| H | -1.570457 | 0.882303  | -1.189117 |
| H | -1.070751 | -0.058858 | -3.315500 |
| C | -0.959547 | -1.687824 | -0.812076 |
| H | -1.114997 | -1.979538 | -1.855155 |
| H | -0.518485 | -2.541269 | -0.288705 |
| H | -1.938618 | -1.489238 | -0.366154 |

Amide (*R,S*)-3a

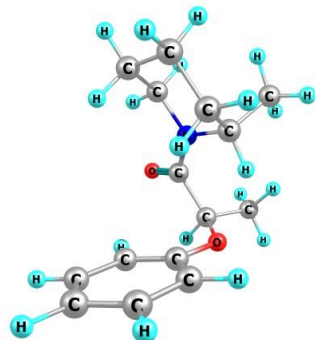

$E_{FSP} = -789.32814756$

$Et_{293} = -788.973932$ ,  $H_{293} = -788.973004$

$G_{293} = -789.031091$

$Et_{253} = -788.977821$ ,  $H_{253} = -788.977019$

$G_{253} = -789.023696$

Imaginary frequency = 0

|   |           |           |           |
|---|-----------|-----------|-----------|
| C | 1.314282  | 3.618212  | -0.909747 |
| C | -0.164410 | 3.243172  | -1.018786 |
| H | -0.650054 | 3.881105  | -1.764692 |
| H | -0.276749 | 2.213615  | -1.368969 |
| C | 1.483213  | 5.022665  | -0.329076 |
| C | -0.840769 | 3.406158  | 0.342090  |
| H | -1.911836 | 3.194947  | 0.275308  |
| H | -0.412319 | 2.683005  | 1.042255  |
| C | -0.648815 | 4.811857  | 0.934744  |
| H | -0.999181 | 4.786370  | 1.958691  |
| N | 0.794743  | 5.134013  | 0.963692  |
| C | -0.020347 | 0.947754  | 3.904776  |
| C | 1.339837  | 0.642769  | 3.865001  |
| C | 2.266242  | 1.677232  | 3.823369  |
| C | 1.854133  | 3.008256  | 3.810133  |
| C | 0.492095  | 3.301302  | 3.842182  |
| C | -0.445429 | 2.267906  | 3.896225  |
| O | -0.021671 | 4.569804  | 3.821256  |
| C | 0.821071  | 5.661461  | 3.433101  |
| C | -0.007393 | 6.934362  | 3.540140  |
| H | -0.324826 | 7.085844  | 4.573620  |
| H | 0.597385  | 7.787867  | 3.228034  |
| H | -0.894176 | 6.886063  | 2.908330  |
| H | 1.664235  | 5.725598  | 4.123548  |
| C | 1.487704  | 5.548458  | 2.042991  |
| O | 2.669635  | 5.907899  | 1.984915  |
| H | 1.827147  | 2.905247  | -0.254897 |
| H | 1.804996  | 3.574667  | -1.885782 |
| H | 2.529141  | 5.266892  | -0.167492 |
| H | -0.755304 | 0.152161  | 3.934908  |
| H | 3.326614  | 1.456136  | 3.796252  |
| H | 2.594120  | 3.794017  | 3.764094  |
| H | -1.499403 | 2.516732  | 3.915898  |
| H | 1.670832  | -0.388288 | 3.865264  |
| H | 1.070411  | 5.768503  | -1.015755 |
| C | -1.438472 | 5.897662  | 0.198570  |
| H | -1.213945 | 5.932843  | -0.868383 |
| H | -2.507949 | 5.705795  | 0.313735  |
| H | -1.220550 | 6.880619  | 0.621427  |

Amide (*R,R*)-3a

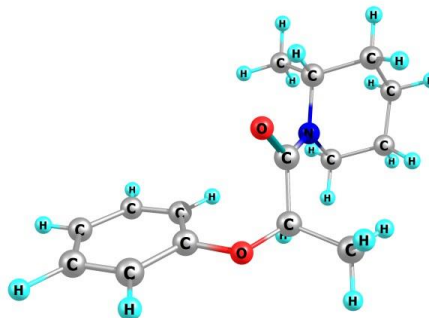

$E_{FSP} = -789.327105427$

$Et_{293} = -788.972735$ ,  $H_{293} = -788.971807$

$G_{293} = -789.030053$

$Et_{253} = -788.976515$ ,  $H_{253} = -788.975814$

$G_{253} = -789.022666$

Imaginary frequency = 0

|   |           |           |           |
|---|-----------|-----------|-----------|
| C | -2.701532 | -0.404379 | 1.904230  |
| C | -2.782554 | 0.567574  | 3.083294  |
| H | -3.751816 | 0.466732  | 3.582645  |
| H | -2.022055 | 0.315817  | 3.826996  |
| C | -3.667160 | -0.035188 | 0.769675  |
| C | -2.598366 | 2.012988  | 2.611647  |
| H | -2.790291 | 2.712618  | 3.429918  |
| H | -1.564515 | 2.167644  | 2.284446  |
| C | -3.541496 | 2.348590  | 1.456674  |
| H | -4.575448 | 2.346213  | 1.815094  |
| H | -3.341152 | 3.347753  | 1.084871  |
| N | -3.424995 | 1.368565  | 0.371623  |
| C | -5.141318 | -0.264232 | 1.110509  |
| C | -5.007924 | 3.357999  | -5.410555 |
| C | -6.243179 | 3.226428  | -4.775790 |
| C | -6.283283 | 3.114947  | -3.391475 |
| C | -5.111612 | 3.128745  | -2.636259 |
| C | -3.880722 | 3.255388  | -3.279778 |
| C | -3.833799 | 3.373331  | -4.671832 |
| O | -2.673837 | 3.284246  | -2.643581 |
| C | -2.613403 | 3.081698  | -1.236738 |
| C | -1.165985 | 3.336601  | -0.833225 |
| H | -0.885150 | 4.361899  | -1.080580 |
| H | -1.025591 | 3.180086  | 0.236766  |
| H | -0.510201 | 2.650322  | -1.371968 |
| H | -3.276764 | 3.800120  | -0.753621 |
| C | -3.006100 | 1.630438  | -0.887635 |
| O | -2.886793 | 0.761168  | -1.749359 |
| H | -1.684876 | -0.398104 | 1.495610  |
| H | -2.910105 | -1.426115 | 2.233565  |
| H | -3.418733 | -0.634299 | -0.102569 |
| H | -5.300230 | -1.314722 | 1.367564  |
| H | -5.477756 | 0.336002  | 1.956789  |
| H | -5.768723 | -0.019291 | 0.250588  |
| H | -4.958124 | 3.450144  | -6.489206 |
| H | -7.233418 | 3.007227  | -2.881759 |
| H | -5.177532 | 3.027155  | -1.562287 |
| H | -2.869466 | 3.474154  | -5.155044 |
| H | -7.157736 | 3.210155  | -5.355096 |

**(R)-1d-(S)-2a RC**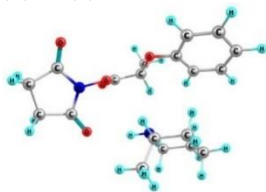

$E_{FSP} = -1225.12946499$   $E_{T_{293}} = -1224.672282$ ,  
 $H_{293} = -1224.671355$   $G_{293} = -1224.774735$   
 $E_{T_{253}} = -1224.677874$ ,  
 $H_{253} = -1224.677073$   $G_{253} = -1224.737996$   
 Imaginary frequency = 0

|   |           |           |           |
|---|-----------|-----------|-----------|
| C | 0.549921  | 0.568876  | -2.750508 |
| C | 0.866082  | -0.696845 | -1.956259 |
| H | 0.331039  | -1.546164 | -2.393800 |
| H | 1.931078  | -0.936393 | -2.016898 |
| C | -0.923966 | 0.923916  | -2.628735 |
| C | 0.460762  | -0.496547 | -0.495007 |
| H | 0.630909  | -1.405511 | 0.086493  |
| H | 1.107684  | 0.263391  | -0.055356 |
| C | -1.006428 | -0.084095 | -0.325646 |
| H | -1.165287 | 0.274014  | 0.686495  |
| N | -1.346969 | 1.085184  | -1.210065 |
| C | 1.663892  | 0.026088  | 3.824522  |
| C | 2.993072  | 0.366507  | 3.580381  |
| C | 3.278288  | 1.330829  | 2.623439  |
| C | 2.259152  | 1.950396  | 1.905059  |
| C | 0.931771  | 1.588408  | 2.139355  |
| C | 0.638192  | 0.631013  | 3.115093  |
| O | -0.138985 | 2.080356  | 1.456503  |
| C | 0.077597  | 2.902530  | 0.315006  |
| C | 0.211999  | 4.366433  | 0.713272  |
| H | 0.998573  | 4.476899  | 1.460988  |
| H | 0.460783  | 4.972628  | -0.157672 |
| H | -0.730584 | 4.721913  | 1.128121  |
| H | 0.973255  | 2.558942  | -0.213087 |
| C | -1.059141 | 2.748206  | -0.694227 |
| O | -2.495613 | 2.752734  | 0.363688  |
| N | -3.433489 | 3.459697  | -0.277497 |
| C | -4.216338 | 2.904989  | -1.262203 |
| C | -5.164919 | 3.973053  | -1.758116 |
| H | -5.120626 | 4.011757  | -2.847196 |
| H | -6.181777 | 3.687049  | -1.478151 |
| O | -4.135762 | 1.748540  | -1.637964 |
| C | -3.589538 | 4.842149  | -0.123241 |
| C | -4.696476 | 5.265902  | -1.071896 |
| H | -5.479379 | 5.773462  | -0.506573 |
| H | -4.275187 | 5.986675  | -1.774983 |
| O | -2.951347 | 5.535359  | 0.623677  |
| O | -1.174519 | 3.492563  | -1.636245 |
| H | 1.156939  | 1.404067  | -2.384562 |
| H | 0.794976  | 0.444467  | -3.808753 |
| H | -1.158441 | 1.864294  | -3.123377 |
| H | -2.373169 | 1.166343  | -1.216354 |
| H | 1.423826  | -0.719920 | 4.572463  |
| H | 4.303947  | 1.621250  | 2.427627  |
| H | 2.512353  | 2.707247  | 1.177783  |
| H | -0.397759 | 0.371525  | 3.295394  |
| H | 3.791551  | -0.109402 | 4.134709  |
| H | -1.544101 | 0.145505  | -3.079043 |
| C | -1.987456 | -1.228783 | -0.576003 |
| H | -1.924565 | -1.625614 | -1.591297 |
| H | -1.768359 | -2.047376 | 0.112662  |
| H | -3.013223 | -0.899815 | -0.395127 |

**(R)-1d-(S)-2a TS**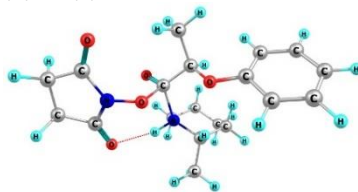

$E_{FSP} = -1225.11718826$   $E_{T_{293}} = -1224.658846$ ,  
 $H_{293} = -1224.657918$   $G_{293} = -1224.731255$   
 $E_{T_{253}} = -1224.664419$ ,  
 $H_{253} = -1224.663617$   $G_{253} = -1224.722103$   
 Imaginary frequency = 1

|   |           |           |           |
|---|-----------|-----------|-----------|
| C | 0.549921  | 0.568876  | -2.750508 |
| C | 0.866082  | -0.696845 | -1.956259 |
| H | 0.331039  | -1.546164 | -2.393800 |
| H | 1.931078  | -0.936393 | -2.016898 |
| C | -0.923966 | 0.923916  | -2.628735 |
| C | 0.460762  | -0.496547 | -0.495007 |
| H | 0.630909  | -1.405511 | 0.086493  |
| H | 1.107684  | 0.263391  | -0.055356 |
| C | -1.006428 | -0.084095 | -0.325646 |
| H | -1.165287 | 0.274014  | 0.686495  |
| N | -1.346969 | 1.085184  | -1.210065 |
| C | 1.663892  | 0.026088  | 3.824522  |
| C | 2.993072  | 0.366507  | 3.580381  |
| C | 3.278288  | 1.330829  | 2.623439  |
| C | 2.259152  | 1.950396  | 1.905059  |
| C | 0.931771  | 1.588408  | 2.139355  |
| C | 0.638192  | 0.631013  | 3.115093  |
| O | -0.138985 | 2.080356  | 1.456503  |
| C | 0.077597  | 2.902530  | 0.315006  |
| C | 0.211999  | 4.366433  | 0.713272  |
| H | 0.998573  | 4.476899  | 1.460988  |
| H | 0.460783  | 4.972628  | -0.157672 |
| H | -0.730584 | 4.721913  | 1.128121  |
| H | 0.973255  | 2.558942  | -0.213087 |
| C | -1.059141 | 2.748206  | -0.694227 |
| O | -2.495613 | 2.752734  | 0.363688  |
| N | -3.433489 | 3.459697  | -0.277497 |
| C | -4.216338 | 2.904989  | -1.262203 |
| C | -5.164919 | 3.973053  | -1.758116 |
| H | -5.120626 | 4.011757  | -2.847196 |
| H | -6.181777 | 3.687049  | -1.478151 |
| O | -4.135762 | 1.748540  | -1.637964 |
| C | -3.589538 | 4.842149  | -0.123241 |
| C | -4.696476 | 5.265902  | -1.071896 |
| H | -5.479379 | 5.773462  | -0.506573 |
| H | -4.275187 | 5.986675  | -1.774983 |
| O | -2.951347 | 5.535359  | 0.623677  |
| O | -1.174519 | 3.492563  | -1.636245 |
| H | 1.156939  | 1.404067  | -2.384562 |
| H | 0.794976  | 0.444467  | -3.808753 |
| H | -1.158441 | 1.864294  | -3.123377 |
| H | -2.373169 | 1.166343  | -1.216354 |
| H | 1.423826  | -0.719920 | 4.572463  |
| H | 4.303947  | 1.621250  | 2.427627  |
| H | 2.512353  | 2.707247  | 1.177783  |
| H | -0.397759 | 0.371525  | 3.295394  |
| H | 3.791551  | -0.109402 | 4.134709  |
| H | -1.544101 | 0.145505  | -3.079043 |
| C | -1.987456 | -1.228783 | -0.576003 |
| H | -1.924565 | -1.625614 | -1.591297 |
| H | -1.768359 | -2.047376 | 0.112662  |
| H | -3.013223 | -0.899815 | -0.395127 |

**(R)-1d-(R)-2a RC**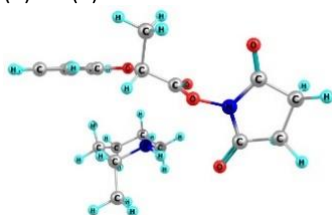

$E_{FSP} = -1225.13101149$   $E_{t_{293}} = -1224.6725094$ ,  
 $H_{293} = -1224.671581$   $G_{293} = -1224.748377$   
 $E_{t_{253}} = -1224.678225$ ,  
 $H_{253} = -1224.677423$   $G_{253} = -1224.738920$   
 Imaginary frequency = 0

|   |           |           |           |
|---|-----------|-----------|-----------|
| C | 1.078290  | -1.272461 | -0.590340 |
| C | -0.089749 | -2.134834 | -0.097370 |
| H | -0.207932 | -3.014662 | -0.740165 |
| H | 0.127423  | -2.510568 | 0.907217  |
| C | 0.787970  | -0.601748 | -1.941606 |
| C | -1.395187 | -1.333775 | -0.106134 |
| H | -2.239190 | -1.971111 | 0.174290  |
| H | -1.339881 | -0.519445 | 0.622855  |
| C | -1.636095 | -0.733958 | -1.487020 |
| H | -1.823546 | -1.546337 | -2.208673 |
| H | -2.528383 | -0.106193 | -1.479146 |
| N | -0.500976 | 0.109112  | -1.872127 |
| C | 0.867990  | -1.582109 | -3.123156 |
| C | 2.090697  | 0.509680  | 3.184909  |
| C | 3.343772  | 0.871735  | 2.691637  |
| C | 3.420865  | 1.699122  | 1.578567  |
| C | 2.268069  | 2.168130  | 0.950271  |
| C | 1.021255  | 1.791721  | 1.446428  |
| C | 0.935248  | 0.965910  | 2.569595  |
| O | -0.176000 | 2.162172  | 0.906703  |
| C | -0.197561 | 2.929011  | -0.284001 |
| C | -0.102536 | 4.429734  | 0.011489  |
| H | 0.840322  | 4.648233  | 0.513084  |
| H | -0.151992 | 5.003050  | -0.914414 |
| H | -0.924489 | 4.734119  | 0.661036  |
| H | 0.585580  | 2.609817  | -0.972309 |
| C | -1.526992 | 2.636374  | -0.943173 |
| O | -2.528996 | 2.230227  | -0.447491 |
| O | -1.452935 | 3.078580  | -2.269979 |
| N | -2.673369 | 3.134891  | -2.890869 |
| C | -3.550338 | 4.193799  | -2.664375 |
| O | -3.350000 | 5.077869  | -1.870507 |
| C | -4.713556 | 3.976187  | -3.602097 |
| H | -5.647810 | 4.087572  | -3.053415 |
| H | -4.674356 | 4.757321  | -4.365107 |
| C | -3.105588 | 2.161350  | -3.785222 |
| O | -2.466162 | 1.193375  | -4.115421 |
| C | -4.499044 | 2.574895  | -4.200818 |
| H | -5.190122 | 1.841870  | -3.779163 |
| H | -4.587586 | 2.535310  | -5.286308 |
| H | 1.279186  | -0.491686 | 0.146395  |
| H | 1.988522  | -1.874223 | -0.671742 |
| H | 1.552719  | 0.167191  | -2.101311 |
| H | -0.700305 | 0.528884  | -2.774052 |
| H | 1.880461  | -1.984266 | -3.226458 |
| H | 0.186429  | -2.426187 | -3.001027 |
| H | 0.606914  | -1.070126 | -4.054511 |
| H | 2.012251  | -0.136889 | 4.050714  |
| H | 4.386434  | 1.995462  | 1.185427  |
| H | 2.363430  | 2.812237  | 0.087859  |
| H | -0.044100 | 0.680766  | 2.933624  |
| H | 4.245351  | 0.511894  | 3.171402  |

**(R)-1d-(R)-2a TS**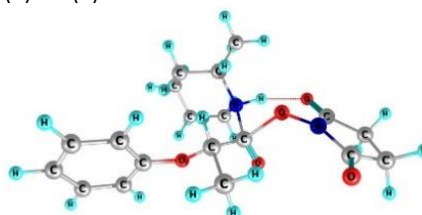

$E_{FSP} = -1225.1218409$   $E_{t_{293}} = -1224.662948$ ,  
 $H_{293} = -1224.662020$   $G_{293} = -1224.734896$   
 $E_{t_{253}} = -1224.668489$ ,  
 $H_{253} = -1224.667687$   $G_{253} = -1224.725789$   
 Imaginary frequency = 1

|   |           |           |           |
|---|-----------|-----------|-----------|
| C | 1.147819  | -0.828911 | -1.225621 |
| C | 0.471902  | -1.987692 | -0.490467 |
| H | 0.285746  | -2.818534 | -1.178329 |
| H | 1.141093  | -2.367144 | 0.285284  |
| C | 0.249621  | -0.171359 | -2.277632 |
| C | -0.843857 | -1.518932 | 0.131418  |
| H | -1.379349 | -2.355387 | 0.588095  |
| H | -0.645025 | -0.792512 | 0.919697  |
| C | -1.762289 | -0.901276 | -0.910856 |
| H | -2.091395 | -1.659680 | -1.623207 |
| H | -2.648124 | -0.454738 | -0.464054 |
| N | -1.116987 | 0.186920  | -1.724033 |
| C | 0.066730  | -1.036906 | -3.524656 |
| C | 1.905806  | 1.087260  | 3.832440  |
| C | 3.189659  | 1.400616  | 3.388088  |
| C | 3.374453  | 1.780818  | 2.064699  |
| C | 2.296827  | 1.853692  | 1.184255  |
| C | 1.016612  | 1.535744  | 1.636840  |
| C | 0.824226  | 1.149793  | 2.965470  |
| O | -0.104172 | 1.524618  | 0.854555  |
| C | -0.139221 | 2.261319  | -0.381201 |
| C | -0.287540 | 3.746716  | -0.106351 |
| H | 0.575853  | 4.103783  | 0.458017  |
| H | -0.360599 | 4.298596  | -1.041264 |
| H | -1.190846 | 3.926295  | 0.478278  |
| H | 0.758719  | 2.067673  | -0.965815 |
| C | -1.358677 | 1.687979  | -1.108367 |
| O | -2.500169 | 1.852570  | -0.719270 |
| O | -1.104834 | 2.477028  | -2.709613 |
| N | -2.302925 | 2.861845  | -3.173163 |
| C | -2.760427 | 4.180152  | -3.138576 |
| O | -2.137521 | 5.116125  | -2.693870 |
| C | -4.135359 | 4.193789  | -3.769429 |
| H | -4.836134 | 4.648299  | -3.068676 |
| H | -4.104308 | 4.821495  | -4.661673 |
| C | -3.223649 | 1.965833  | -3.667216 |
| O | -3.037288 | 0.759517  | -3.733051 |
| C | -4.454373 | 2.726351  | -4.083328 |
| H | -5.304356 | 2.343982  | -3.516137 |
| H | -4.650988 | 2.539580  | -5.140482 |
| H | 1.471318  | -0.088812 | -0.494505 |
| H | 2.049930  | -1.171650 | -1.738173 |
| H | 0.687520  | 0.773402  | -2.594091 |
| H | -1.724283 | 0.378001  | -2.551114 |
| H | 1.046247  | -1.244881 | -3.959312 |
| H | -0.410945 | -1.992146 | -3.300309 |
| H | -0.535022 | -0.517049 | -4.272466 |
| H | 1.743971  | 0.790514  | 4.862032  |
| H | 4.365165  | 2.027821  | 1.701906  |
| H | 2.470681  | 2.158748  | 0.162107  |
| H | -0.176687 | 0.906535  | 3.300531  |
| H | 4.031848  | 1.349143  | 4.066581  |



**(R)-1d-(S)-2a PC**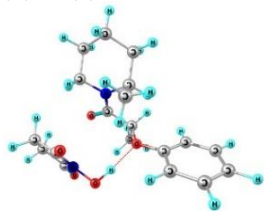

$E_{FSP} = -1225.15520091$   $E_{t_{293}} = -1224.695992$ ,  
 $H_{t_{293}} = -1224.695064$   $G_{t_{293}} = -1224.771047$   
 $E_{t_{253}} = -1224.701718$ ,  
 $H_{t_{253}} = -1224.700917$   $G_{t_{253}} = -1224.761697$   
 Imaginary frequency = 0

|   |           |           |           |
|---|-----------|-----------|-----------|
| C | -0.551221 | 0.447128  | -3.783367 |
| C | 0.130584  | -0.808129 | -3.237200 |
| H | -0.631302 | -1.544664 | -2.961692 |
| H | 0.752928  | -1.273699 | -4.005819 |
| C | -1.334974 | 1.162556  | -2.686296 |
| C | 0.985015  | -0.451191 | -2.018945 |
| H | 1.429722  | -1.346588 | -1.575981 |
| H | 1.809615  | 0.194570  | -2.338882 |
| C | 0.190847  | 0.285071  | -0.926395 |
| H | 0.911288  | 0.647975  | -0.199637 |
| N | -0.486898 | 1.454335  | -1.523474 |
| C | 0.321457  | 0.270122  | 4.242838  |
| C | 1.691360  | 0.421153  | 4.447373  |
| C | 2.422694  | 1.222125  | 3.579397  |
| C | 1.804087  | 1.866820  | 2.508331  |
| C | 0.437349  | 1.698510  | 2.309338  |
| C | -0.307393 | 0.900226  | 3.178207  |
| O | -0.269594 | 2.274762  | 1.275215  |
| C | 0.418781  | 2.974764  | 0.209977  |
| C | 0.545724  | 4.445310  | 0.547636  |
| H | 1.142785  | 4.567762  | 1.452591  |
| H | 1.040816  | 4.972995  | -0.268505 |
| H | -0.434424 | 4.894915  | 0.704725  |
| H | 1.406442  | 2.533442  | 0.074062  |
| C | -0.412665 | 2.722561  | -1.065461 |
| O | -2.851356 | 3.172039  | 1.756463  |
| N | -3.349338 | 3.382111  | 0.497722  |
| C | -3.864949 | 2.352539  | -0.276152 |
| C | -4.391229 | 2.985851  | -1.544111 |
| H | -3.879179 | 2.540113  | -2.395405 |
| H | -5.452819 | 2.749133  | -1.633671 |
| O | -3.863517 | 1.185802  | 0.043691  |
| C | -3.477841 | 4.658217  | -0.040525 |
| C | -4.116581 | 4.490019  | -1.400521 |
| H | -5.020002 | 5.098615  | -1.450317 |
| H | -3.412842 | 4.863007  | -2.144384 |
| O | -3.132935 | 5.674760  | 0.513196  |
| O | -0.982084 | 3.669552  | -1.611397 |
| H | 0.200071  | 1.133091  | -4.189253 |
| H | -1.238066 | 0.198084  | -4.596839 |
| H | -1.732143 | 2.107323  | -3.044783 |
| H | -1.920634 | 2.871873  | 1.633514  |
| H | -0.263689 | -0.348548 | 4.912329  |
| H | 3.485773  | 1.363339  | 3.733818  |
| H | 2.396208  | 2.493833  | 1.857702  |
| H | -1.369070 | 0.772040  | 3.009094  |
| H | 2.179652  | -0.077538 | 5.275014  |
| H | -2.174957 | 0.543540  | -2.354312 |
| C | -0.792482 | -0.629088 | -0.191308 |
| H | -1.458563 | -1.155456 | -0.876630 |
| H | -0.229739 | -1.374799 | 0.375590  |
| H | -1.406477 | -0.053594 | 0.500330  |

**(R)-1d-(R)-2a PC**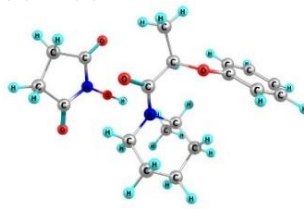

$E_{FSP} = -1225.146883997$   $E_{t_{293}} = -1224.688232$ ,  
 $H_{t_{293}} = -1224.687305$   $G_{t_{293}} = -1224.761391$   
 $E_{t_{253}} = -1224.693851$ ,  
 $H_{t_{253}} = -1224.693049$   $G_{t_{253}} = -1224.752204$   
 Imaginary frequency = 0

|   |           |           |           |
|---|-----------|-----------|-----------|
| C | 0.474099  | -1.158503 | -0.112864 |
| C | -0.476735 | -2.259816 | -0.580611 |
| H | -0.106366 | -2.710426 | -1.507189 |
| H | -0.511408 | -3.060043 | 0.163065  |
| C | 0.503416  | 0.038742  | -1.075455 |
| C | -1.874602 | -1.682226 | -0.807648 |
| H | -2.547901 | -2.433653 | -1.228870 |
| H | -2.299642 | -1.359850 | 0.149613  |
| C | -1.832319 | -0.483174 | -1.753425 |
| H | -1.536367 | -0.807403 | -2.753025 |
| H | -2.807634 | -0.013685 | -1.826575 |
| N | -0.878258 | 0.542113  | -1.286043 |
| C | 1.187761  | -0.271034 | -2.406993 |
| C | 2.782764  | 0.669528  | 3.091417  |
| C | 3.875257  | 1.289653  | 2.485171  |
| C | 3.654053  | 2.206321  | 1.464543  |
| C | 2.361351  | 2.496305  | 1.028233  |
| C | 1.278618  | 1.843827  | 1.618038  |
| C | 1.493224  | 0.941079  | 2.662094  |
| O | -0.028285 | 1.995736  | 1.240753  |
| C | -0.377293 | 2.622977  | -0.010007 |
| C | -0.964525 | 3.993547  | 0.252743  |
| H | -0.213391 | 4.619852  | 0.738109  |
| H | -1.265979 | 4.459947  | -0.685069 |
| H | -1.837910 | 3.916233  | 0.900278  |
| H | 0.501079  | 2.717482  | -0.647124 |
| C | -1.380906 | 1.665188  | -0.686089 |
| O | -2.577478 | 1.939321  | -0.697722 |
| O | -0.989218 | 1.889259  | -4.225835 |
| N | -2.278653 | 2.252128  | -3.933941 |
| C | -2.588621 | 3.485745  | -3.373461 |
| O | -1.768353 | 4.311319  | -3.050855 |
| C | -4.094015 | 3.540988  | -3.271906 |
| H | -4.362451 | 3.708414  | -2.228718 |
| H | -4.449772 | 4.392919  | -3.853110 |
| C | -3.360272 | 1.448257  | -4.265785 |
| O | -3.270916 | 0.367541  | -4.797362 |
| C | -4.596348 | 2.192065  | -3.816442 |
| H | -5.096375 | 1.592375  | -3.053988 |
| H | -5.277624 | 2.288225  | -4.662017 |
| H | 0.152535  | -0.796563 | 0.866958  |
| H | 1.491551  | -1.540315 | 0.003737  |
| H | 1.081743  | 0.822851  | -0.602582 |
| H | -0.651819 | 1.460214  | -3.417627 |
| H | 2.191709  | -0.656221 | -2.216632 |
| H | 0.653681  | -1.016034 | -2.996949 |
| H | 1.293631  | 0.635885  | -3.007909 |
| H | 2.936444  | -0.040661 | 3.894914  |
| H | 4.490700  | 2.708308  | 0.993162  |
| H | 2.221398  | 3.220299  | 0.237576  |
| H | 0.638766  | 0.449659  | 3.109967  |
| H | 4.882055  | 1.062322  | 2.813445  |

(R)-1d-(S)-2a RC, :N eq

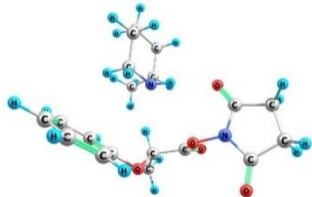

$E_{FSP} = -1225.12831946$   $E_{t_{293}} = -1224.671028$ ,  
 $H_{293} = -1224.67010047$   $G_{293} = -1224.745575$   
 $E_{t_{253}} = -1224.676607$ ,  
 $H_{253} = -1224.675806$   $G_{253} = -1224.736297$   
Imaginary frequency = 0

|   |           |           |           |
|---|-----------|-----------|-----------|
| C | -1.184216 | -2.093961 | -1.358697 |
| H | 1.761385  | -0.869993 | -1.446925 |
| O | -0.988581 | -3.199256 | -0.951785 |
| C | -1.281473 | -1.659472 | -2.809470 |
| H | -0.247509 | -1.356400 | -3.039411 |
| C | -1.737818 | -2.792273 | -3.709828 |
| H | -1.109930 | -3.670502 | -3.558276 |
| H | -2.774456 | -3.061154 | -3.496796 |
| H | -1.658206 | -2.480045 | -4.751806 |
| O | -2.151669 | -0.530805 | -2.897148 |
| C | -1.654257 | 0.627217  | -3.445194 |
| C | -0.853786 | 0.630044  | -4.584177 |
| H | -0.574431 | -0.300455 | -5.059807 |
| C | -0.408058 | 1.839121  | -5.106158 |
| H | 0.223205  | 1.836949  | -5.986744 |
| C | -0.766407 | 3.041598  | -4.504760 |
| H | -0.415938 | 3.980883  | -4.914761 |
| C | -2.020856 | 1.824183  | -2.836358 |
| H | -2.639386 | 1.794720  | -1.948232 |
| C | -1.578330 | 3.027699  | -3.372559 |
| H | -1.864099 | 3.958143  | -2.896103 |
| C | 2.194180  | 0.584373  | -2.806097 |
| C | 2.879879  | -1.789374 | -2.890268 |
| C | 4.310774  | -1.393742 | -2.469395 |
| C | 4.653607  | 0.050643  | -2.856713 |
| C | 3.586654  | 1.024925  | -2.346409 |
| H | 2.116835  | 0.698065  | -3.891576 |
| H | 4.395181  | -1.502461 | -1.381412 |
| H | 5.031871  | -2.088725 | -2.911793 |
| H | 5.636285  | 0.318719  | -2.456700 |
| H | 4.726055  | 0.138450  | -3.947142 |
| H | 3.611651  | 1.056607  | -1.249827 |
| H | 3.792596  | 2.039028  | -2.706388 |
| N | 1.872110  | -0.803353 | -2.454995 |
| H | 1.419353  | 1.224963  | -2.377930 |
| H | 2.622018  | -2.721961 | -2.378676 |
| C | 2.770785  | -2.053635 | -4.394310 |
| H | 3.459676  | -2.849485 | -4.688211 |
| H | 1.756017  | -2.365405 | -4.654102 |
| H | 3.016586  | -1.170027 | -4.987936 |
| O | -1.258968 | -0.982526 | -0.526642 |
| N | -1.051603 | -1.281366 | 0.795678  |
| C | 0.223506  | -1.325415 | 1.343369  |
| O | 1.242974  | -1.175926 | 0.713419  |
| C | -2.111352 | -1.499537 | 1.673410  |
| O | -3.273117 | -1.506631 | 1.352518  |
| C | 0.033772  | -1.589326 | 2.819167  |
| H | 0.577776  | -2.496747 | 3.083379  |
| H | 0.475665  | -0.762827 | 3.376787  |
| C | -1.484942 | -1.715099 | 3.031690  |
| H | -1.783193 | -2.699671 | 3.394588  |
| H | -1.884723 | -0.972036 | 3.722249  |

(R)-1d-(S)-2a TS, :N eq

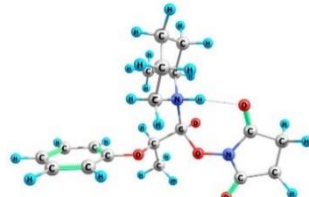

$E_{FSP} = -1225.121050623$   $E_{t_{293}} = -1224.662689$ ,  
 $H_{293} = -1224.661762$   $G_{293} = -1224.734988$   
 $E_{t_{253}} = -1224.66824682$ ,  
 $H_{253} = -1224.667446$   $G_{253} = -1224.725867$   
Imaginary frequency = 1

|   |           |           |           |
|---|-----------|-----------|-----------|
| C | 0.069103  | -1.634696 | -1.690422 |
| H | 1.784759  | -0.961487 | -0.704068 |
| O | 0.171753  | -2.810255 | -1.407310 |
| C | -0.825100 | -1.159796 | -2.840704 |
| H | -0.314215 | -1.479118 | -3.753175 |
| C | -2.205326 | -1.794473 | -2.756170 |
| H | -2.134816 | -2.876809 | -2.869539 |
| H | -2.659557 | -1.564908 | -1.792078 |
| H | -2.836734 | -1.395338 | -3.552318 |
| O | -0.926270 | 0.260409  | -2.823380 |
| C | -1.052038 | 0.958482  | -3.981902 |
| C | -1.193323 | 0.393468  | -5.249903 |
| H | -1.252361 | -0.677285 | -5.382487 |
| C | -1.280307 | 1.223477  | -6.365623 |
| H | -1.391902 | 0.773130  | -7.344785 |
| C | -1.237392 | 2.604591  | -6.236707 |
| H | -1.309078 | 3.240066  | -7.109864 |
| C | -1.022728 | 2.350713  | -3.846086 |
| H | -0.933789 | 2.770105  | -2.851602 |
| C | -1.113162 | 3.162219  | -4.965325 |
| H | -1.088579 | 4.238824  | -4.844140 |
| C | 1.761241  | 0.552771  | -2.057834 |
| C | 2.669136  | -1.759412 | -2.357770 |
| C | 4.049170  | -1.264467 | -1.896616 |
| C | 4.271157  | 0.222560  | -2.192346 |
| C | 3.130806  | 1.061596  | -1.614108 |
| H | 1.615005  | 0.686871  | -3.128534 |
| H | 4.139460  | -1.439185 | -0.819204 |
| H | 4.817371  | -1.873611 | -2.380108 |
| H | 5.225360  | 0.544659  | -1.767248 |
| H | 4.338877  | 0.390015  | -3.272631 |
| H | 3.175421  | 1.037683  | -0.519579 |
| H | 3.227414  | 2.107363  | -1.920055 |
| N | 1.621038  | -0.892036 | -1.722406 |
| H | 0.961044  | 1.073928  | -1.542995 |
| H | 2.484536  | -2.750562 | -1.943344 |
| C | 2.539782  | -1.840093 | -3.874607 |
| H | 3.323142  | -2.497266 | -4.257241 |
| H | 1.582734  | -2.271459 | -4.167541 |
| H | 2.652232  | -0.874684 | -4.369778 |
| O | -0.476266 | -0.652442 | -0.386739 |
| N | -0.452825 | -1.374130 | 0.743845  |
| C | 0.705112  | -1.650462 | 1.425753  |
| O | 1.820168  | -1.294325 | 1.080918  |
| C | -1.608029 | -1.936266 | 1.303537  |
| O | -2.709843 | -1.860621 | 0.832304  |
| C | 0.344248  | -2.455900 | 2.653429  |
| H | 0.866373  | -3.413158 | 2.603986  |
| H | 0.707358  | -1.931996 | 3.539290  |
| C | -1.183907 | -2.600853 | 2.603047  |
| H | -1.525288 | -3.636582 | 2.599787  |
| H | -1.687869 | -2.092516 | 3.427115  |

(R)-1d-(R)-2a RC, :N eq

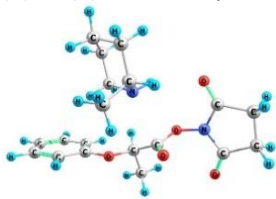

$E_{FSP} = -1225.13054710$   $E_{T_{293}} = -1224.672322$ ,  
 $H_{T_{293}} = -1224.671394$   $G_{T_{293}} = -1224.748397$   
 $E_{T_{253}} = -1224.6780369$ ,  
 $H_{T_{253}} = -1224.677236$   $G_{T_{253}} = -1224.738939$   
Imaginary frequency = 0

|   |          |           |           |
|---|----------|-----------|-----------|
| C | 2.776292 | 3.926080  | -1.897617 |
| O | 1.618071 | 3.675041  | -1.782856 |
| H | 4.243296 | 1.818340  | -0.513652 |
| O | 3.623042 | 3.215615  | -2.768070 |
| N | 2.943474 | 2.313353  | -3.542590 |
| C | 2.928109 | 0.951173  | -3.266852 |
| O | 3.488351 | 0.428324  | -2.334292 |
| C | 2.094305 | 0.317317  | -4.358829 |
| H | 2.703796 | -0.421584 | -4.880117 |
| H | 1.260334 | -0.207342 | -3.890102 |
| C | 2.236880 | 2.723266  | -4.670249 |
| O | 2.157555 | 3.869326  | -5.036921 |
| C | 1.641436 | 1.471113  | -5.269896 |
| H | 0.557238 | 1.588041  | -5.304377 |
| H | 2.002930 | 1.370567  | -6.294295 |
| C | 3.538672 | 5.138723  | -1.405592 |
| H | 4.563383 | 4.826252  | -1.205005 |
| C | 3.496125 | 6.217761  | -2.492503 |
| H | 3.952675 | 5.850196  | -3.411804 |
| H | 2.461677 | 6.497748  | -2.698475 |
| H | 4.041034 | 7.099572  | -2.155624 |
| O | 2.902175 | 5.576368  | -0.216309 |
| C | 3.618002 | 6.301962  | 0.694120  |
| C | 4.940142 | 6.713284  | 0.525215  |
| H | 5.489955 | 6.494649  | -0.378565 |
| C | 5.571846 | 7.426667  | 1.542171  |
| H | 6.599426 | 7.740057  | 1.400040  |
| C | 4.902930 | 7.740603  | 2.718310  |
| H | 5.403572 | 8.294104  | 3.502563  |
| C | 2.935737 | 6.624596  | 1.870134  |
| H | 1.910015 | 6.297363  | 1.984483  |
| C | 3.575549 | 7.340987  | 2.870518  |
| H | 3.035106 | 7.586225  | 3.777088  |
| C | 2.741629 | 1.731253  | 0.855562  |
| C | 1.807056 | 2.708928  | 1.570051  |
| H | 0.977151 | 2.166249  | 2.030888  |
| H | 2.317858 | 3.265508  | 2.358642  |
| H | 1.407478 | 3.431376  | 0.858531  |
| C | 4.863343 | 2.974581  | 1.054220  |
| H | 4.430983 | 3.781683  | 1.652347  |
| C | 5.463368 | 1.912806  | 1.981214  |
| C | 4.357799 | 1.189774  | 2.755449  |
| C | 3.296218 | 0.640309  | 1.794570  |
| H | 6.021125 | 1.185186  | 1.377413  |
| H | 6.176481 | 2.380137  | 2.668780  |
| H | 4.782072 | 0.376499  | 3.352273  |
| H | 3.893865 | 1.886994  | 3.462768  |
| H | 3.750373 | -0.143764 | 1.176924  |
| H | 2.476619 | 0.174915  | 2.352427  |
| N | 3.824857 | 2.452893  | 0.160564  |
| H | 2.161795 | 1.239787  | 0.068635  |
| H | 5.644130 | 3.428038  | 0.437169  |

(R)-1d-(R)-2a TS, :N eq

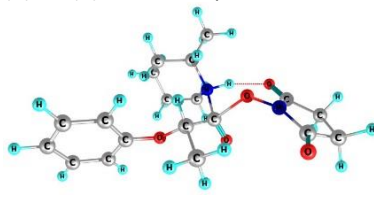

$E_{FSP} = -1225.12377347$   $E_{T_{293}} = -1224.666338$ ,  
 $H_{T_{293}} = -1224.664411$   $G_{T_{293}} = -1224.737573$   
 $E_{T_{253}} = -1224.670886$ ,  
 $H_{T_{253}} = -1224.670085$   $G_{T_{253}} = -1224.728459$   
Imaginary frequency = 1

|   |           |           |           |
|---|-----------|-----------|-----------|
| C | 1.147819  | -0.828911 | -1.225621 |
| C | 0.471902  | -1.987692 | -0.490467 |
| H | 0.285746  | -2.818534 | -1.178329 |
| H | 1.141093  | -2.367144 | 0.285284  |
| C | 0.249621  | -0.171359 | -2.277632 |
| C | -0.843857 | -1.518932 | 0.131418  |
| H | -1.379349 | -2.355387 | 0.588095  |
| H | -0.645025 | -0.792512 | 0.919697  |
| C | -1.762289 | -0.901276 | -0.910856 |
| H | -2.091395 | -1.659680 | -1.623207 |
| H | -2.648124 | -0.454738 | -0.464054 |
| N | -1.116987 | 0.186920  | -1.724033 |
| C | 0.066730  | -1.036906 | -3.524656 |
| C | 1.905806  | 1.087260  | 3.832440  |
| C | 3.189659  | 1.400616  | 3.388088  |
| C | 3.374453  | 1.780818  | 2.064699  |
| C | 2.296827  | 1.853692  | 1.184255  |
| C | 1.016612  | 1.535744  | 1.636840  |
| C | 0.824226  | 1.149793  | 2.965470  |
| O | -0.104172 | 1.524618  | 0.854555  |
| C | -0.139221 | 2.261319  | -0.381201 |
| C | -0.287540 | 3.746716  | -0.106351 |
| H | 0.575853  | 4.103783  | 0.458017  |
| H | -0.360599 | 4.298596  | -1.041264 |
| H | -1.190846 | 3.926295  | 0.478278  |
| H | 0.758719  | 2.067673  | -0.965815 |
| C | -1.358677 | 1.687979  | -1.108367 |
| O | -2.500169 | 1.852570  | -0.719270 |
| O | -1.104834 | 2.477028  | -2.709613 |
| N | -2.302925 | 2.861845  | -3.173163 |
| C | -2.760427 | 4.180152  | -3.138576 |
| O | -2.137521 | 5.116125  | -2.693870 |
| C | -4.135359 | 4.193789  | -3.769429 |
| H | -4.836134 | 4.648299  | -3.068676 |
| H | -4.104308 | 4.821495  | -4.661673 |
| C | -3.223649 | 1.965833  | -3.667216 |
| O | -3.037288 | 0.759517  | -3.733051 |
| C | -4.454373 | 2.726351  | -4.083328 |
| H | -5.304356 | 2.343982  | -3.516137 |
| H | -4.650988 | 2.539580  | -5.140482 |
| H | 1.471318  | -0.088812 | -0.494505 |
| H | 2.049930  | -1.171650 | -1.738173 |
| H | 0.687520  | 0.773402  | -2.594091 |
| H | -1.724283 | 0.300078  | -2.551114 |
| H | 1.046247  | -1.244881 | -3.959312 |
| H | -0.410945 | -1.992146 | -3.300309 |
| H | -0.535022 | -0.517049 | -4.272466 |
| H | 1.743971  | 0.790514  | 4.862032  |
| H | 4.365165  | 2.027821  | 1.701906  |
| H | 2.470681  | 2.158748  | 0.162107  |
| H | -0.176687 | 0.906535  | 3.300531  |
| H | 4.031848  | 1.349143  | 4.066581  |

**(R)-1d-(S)-2c RC**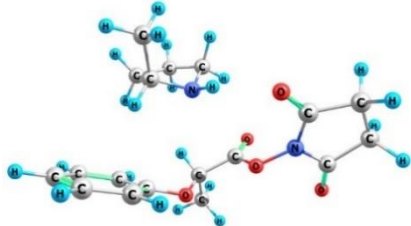

$E_{FSP} = -1185.82140198$   $E_{t_{293}} = -1185.393926$ ,  
 $H_{293} = -1185.392998$   $G_{293} = -1185.466590$   
 $E_{t_{253}} = -1185.399255$ ,  
 $H_{253} = -1185.398454$   $G_{253} = -1185.457529$   
 Imaginary frequency = 0

|   |           |           |           |
|---|-----------|-----------|-----------|
| C | 0.715121  | 0.327746  | -2.751504 |
| C | -0.733984 | 0.788710  | -2.512203 |
| C | 1.105873  | -0.437588 | -1.458540 |
| H | 1.411397  | -1.466411 | -1.658970 |
| H | 1.939380  | 0.058850  | -0.959545 |
| C | -0.144679 | -0.387737 | -0.558493 |
| H | 0.139497  | -0.227172 | 0.482925  |
| N | -0.840015 | 0.813471  | -1.050546 |
| C | 0.599440  | 0.046697  | 3.506318  |
| C | 1.889444  | -0.337657 | 3.146209  |
| C | 2.597258  | 0.429944  | 2.228104  |
| C | 2.030320  | 1.570514  | 1.664945  |
| C | 0.736235  | 1.939987  | 2.024280  |
| C | 0.019385  | 1.176360  | 2.944724  |
| O | 0.106611  | 3.057916  | 1.543355  |
| C | 0.404096  | 3.511312  | 0.229022  |
| C | 1.212614  | 4.805645  | 0.270619  |
| H | 2.157565  | 4.620225  | 0.782916  |
| H | 1.421621  | 5.154779  | -0.741456 |
| H | 0.664495  | 5.579514  | 0.811143  |
| H | 0.932046  | 2.738527  | -0.329336 |
| C | -0.884636 | 3.721074  | -0.551369 |
| O | -1.996425 | 3.627121  | 0.271310  |
| N | -3.189757 | 3.829195  | -0.378799 |
| C | -4.077694 | 2.778605  | -0.576003 |
| C | -5.329450 | 3.390506  | -1.161571 |
| H | -5.504850 | 2.947681  | -2.142926 |
| H | -6.173624 | 3.128752  | -0.522775 |
| O | -3.843241 | 1.624177  | -0.312325 |
| C | -3.671716 | 5.104584  | -0.671913 |
| C | -5.066742 | 4.903867  | -1.222201 |
| H | -5.760149 | 5.480220  | -0.608707 |
| H | -5.105962 | 5.304935  | -2.235689 |
| O | -3.054271 | 6.123588  | -0.492920 |
| O | -0.946532 | 4.007765  | -1.709294 |
| H | 1.368518  | 1.190578  | -2.895713 |
| H | 0.796380  | -0.294839 | -3.643688 |
| H | -0.937873 | 1.779806  | -2.921923 |
| H | -1.803403 | 0.855422  | -0.733970 |
| H | 0.032873  | -0.546509 | 4.214154  |
| H | 3.599643  | 0.139300  | 1.936368  |
| H | 2.601113  | 2.158439  | 0.958671  |
| H | -0.988938 | 1.476417  | 3.200686  |
| H | 2.337454  | -1.223443 | 3.579087  |
| H | -1.439758 | 0.087526  | -2.979756 |
| C | -0.990733 | -1.665870 | -0.636428 |
| H | -1.292246 | -1.893182 | -1.663407 |
| H | -0.428403 | -2.522423 | -0.253037 |
| H | -1.896986 | -1.560953 | -0.032248 |

**(R)-1d-(S)-2c TS**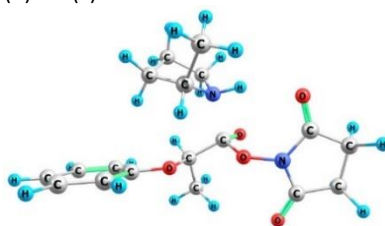

$E_{FSP} = -1185.81668056$   $E_{t_{293}} = -1185.389191$ ,  
 $H_{293} = -1185.388263$   $G_{293} = -1185.458453$   
 $E_{t_{253}} = -1185.394348$ ,  
 $H_{253} = -1185.393547$   $G_{253} = -1185.449683$   
 Imaginary frequency = 1

|   |           |           |           |
|---|-----------|-----------|-----------|
| C | -0.851791 | -0.208440 | -3.332290 |
| C | -1.674448 | 0.886093  | -2.634453 |
| C | 0.325728  | -0.458399 | -2.381142 |
| H | 0.758922  | -1.453684 | -2.486990 |
| H | 1.121170  | 0.264061  | -2.563559 |
| C | -0.281578 | -0.243064 | -0.992963 |
| H | 0.459300  | 0.056013  | -0.257153 |
| N | -1.215013 | 0.912542  | -1.209778 |
| C | 4.696795  | 0.347034  | -1.073587 |
| C | 5.118442  | 0.802729  | -2.321972 |
| C | 4.344345  | 1.736694  | -2.998197 |
| C | 3.156630  | 2.218537  | -2.450011 |
| C | 2.733280  | 1.742201  | -1.209599 |
| C | 3.517227  | 0.815413  | -0.516376 |
| O | 1.567984  | 2.092773  | -0.594200 |
| C | 0.626713  | 2.935745  | -1.258305 |
| C | 0.966790  | 4.407996  | -1.052271 |
| H | 1.983758  | 4.608970  | -1.392721 |
| H | 0.278596  | 5.031269  | -1.622577 |
| H | 0.879914  | 4.668232  | 0.002870  |
| H | 0.598697  | 2.695812  | -2.324173 |
| C | -0.779160 | 2.658865  | -0.714199 |
| O | -0.635351 | 2.371843  | 0.766089  |
| N | -1.658966 | 2.922277  | 1.465429  |
| C | -2.878820 | 2.295405  | 1.615549  |
| C | -3.748867 | 3.214065  | 2.439978  |
| H | -4.665001 | 3.415021  | 1.883343  |
| H | -4.024908 | 2.701464  | 3.362981  |
| O | -3.150065 | 1.204821  | 1.155604  |
| C | -1.558717 | 4.183469  | 2.045245  |
| C | -2.899351 | 4.472885  | 2.682834  |
| H | -2.753648 | 4.706989  | 3.738022  |
| H | -3.316046 | 5.359154  | 2.200664  |
| O | -0.566135 | 4.870440  | 2.017239  |
| O | -1.721694 | 3.357038  | -1.062803 |
| H | -0.524947 | 0.106139  | -4.323759 |
| H | -1.449236 | -1.113825 | -3.449249 |
| H | -1.502359 | 1.873654  | -3.062360 |
| H | -2.002208 | 0.837245  | -0.565958 |
| H | 5.291590  | -0.376814 | -0.529037 |
| H | 4.664798  | 2.108593  | -3.964333 |
| H | 2.576433  | 2.945141  | -3.000128 |
| H | 3.174705  | 0.461963  | 0.448339  |
| H | 6.036685  | 0.431293  | -2.759665 |
| H | -2.745249 | 0.692322  | -2.675752 |
| C | -1.046842 | -1.462090 | -0.481798 |
| H | -1.815356 | -1.785062 | -1.188213 |
| H | -0.352832 | -2.291699 | -0.330294 |
| H | -1.531203 | -1.241354 | 0.472411  |

**(R)-1d-(R)-2c RC**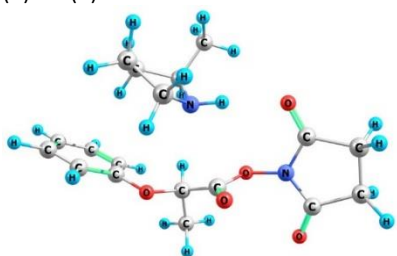

$E_{FSP} = -1185.82353409$   $E_{t_{293}} = -1185.396066$ ,

$H_{293} = -1185.395138$   $G_{293} = -1185.469288$

$E_{t_{253}} = -1185.401408$ ,

$H_{253} = -1185.400607$   $G_{253} = -1185.460128$

Imaginary frequency = 0

|   |           |           |           |
|---|-----------|-----------|-----------|
| C | -0.035616 | -1.405915 | 0.665605  |
| C | -0.240403 | -0.556303 | -0.595585 |
| C | -1.437258 | -1.967907 | 0.957312  |
| H | -1.594521 | -2.900579 | 0.410842  |
| H | -1.585016 | -2.180034 | 2.017695  |
| C | -2.398150 | -0.876206 | 0.445358  |
| H | -3.224694 | -1.315631 | -0.122287 |
| H | -2.836160 | -0.307484 | 1.270692  |
| N | -1.579060 | 0.023876  | -0.393293 |
| C | -0.132196 | -1.368604 | -1.891986 |
| C | -0.259210 | -0.064532 | 4.460155  |
| C | 1.102089  | 0.204047  | 4.322008  |
| C | 1.514421  | 1.161831  | 3.403303  |
| C | 0.588806  | 1.847484  | 2.620688  |
| C | -0.769466 | 1.559211  | 2.754069  |
| C | -1.192321 | 0.607795  | 3.685082  |
| O | -1.759531 | 2.164893  | 2.031419  |
| C | -1.401552 | 2.896062  | 0.871507  |
| C | -1.248834 | 4.386008  | 1.182051  |
| H | -0.467304 | 4.523900  | 1.929737  |
| H | -0.974645 | 4.939483  | 0.283090  |
| H | -2.185074 | 4.784171  | 1.577752  |
| H | -0.491978 | 2.491117  | 0.430498  |
| C | -2.504824 | 2.686823  | -0.146271 |
| O | -3.651125 | 2.417779  | 0.025849  |
| O | -1.974517 | 3.007491  | -1.400268 |
| N | -2.903264 | 3.063927  | -2.407884 |
| C | -3.539421 | 4.261312  | -2.736954 |
| O | -3.443425 | 5.277745  | -2.097184 |
| C | -4.292925 | 3.991048  | -4.019138 |
| H | -5.332526 | 4.297546  | -3.906404 |
| H | -3.841619 | 4.610459  | -4.797168 |
| C | -3.130446 | 1.997049  | -3.266266 |
| O | -2.620897 | 0.907382  | -3.162832 |
| C | -4.114330 | 2.490423  | -4.297705 |
| H | -5.041542 | 1.928612  | -4.168007 |
| H | -3.723203 | 2.271382  | -5.291552 |
| H | 0.299809  | -0.774340 | 1.489992  |
| H | 0.710440  | -2.188410 | 0.514397  |
| H | 0.497464  | 0.254304  | -0.637388 |
| H | -2.021274 | 0.217801  | -1.282689 |
| H | 0.888321  | -1.734668 | -2.043499 |
| H | -0.804555 | -2.231460 | -1.874487 |
| H | -0.405324 | -0.748668 | -2.750082 |
| H | -0.597209 | -0.807527 | 5.172432  |
| H | 2.566896  | 1.392998  | 3.288291  |
| H | 0.941735  | 2.593548  | 1.923500  |
| H | -2.250310 | 0.396212  | 3.776987  |
| H | 1.828882  | -0.323816 | 4.926171  |

**(R)-1d-(R)-2c TS**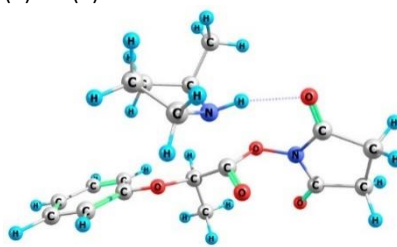

$E_{FSP} = -1185.81835826$   $E_{t_{293}} = -1185.390178$ ,

$H_{293} = -1185.3892504$   $G_{293} = -1185.461877$

$E_{t_{253}} = -1185.3954663$ ,

$H_{253} = -1185.3946651$   $G_{253} = -1185.452829$

Imaginary frequency = 1

|   |           |           |           |
|---|-----------|-----------|-----------|
| C | -0.063672 | -1.213637 | 0.280368  |
| C | -0.343283 | -0.384944 | -0.977706 |
| C | -1.395370 | -1.931379 | 0.552530  |
| H | -1.448967 | -2.859927 | -0.018813 |
| H | -1.525936 | -2.184304 | 1.605491  |
| C | -2.472566 | -0.947020 | 0.067779  |
| H | -3.262601 | -1.446863 | -0.492399 |
| H | -2.932850 | -0.395067 | 0.884364  |
| N | -1.768629 | 0.029320  | -0.815306 |
| C | -0.148210 | -1.155562 | -2.284078 |
| C | -0.433673 | 0.607866  | 5.165654  |
| C | 0.879580  | 1.074081  | 5.206675  |
| C | 1.422879  | 1.668076  | 4.074327  |
| C | 0.675974  | 1.805787  | 2.905034  |
| C | -0.639005 | 1.343274  | 2.877660  |
| C | -1.189200 | 0.740858  | 4.011319  |
| O | -1.464151 | 1.396628  | 1.793861  |
| C | -1.159787 | 2.243157  | 0.686477  |
| C | -1.316823 | 3.716682  | 1.046545  |
| H | -0.624581 | 3.988595  | 1.843353  |
| H | -1.110385 | 4.338631  | 0.175724  |
| H | -2.336650 | 3.907143  | 1.385917  |
| H | -0.151012 | 2.044712  | 0.319988  |
| C | -2.185767 | 1.848137  | -0.381045 |
| O | -3.390157 | 1.904443  | -0.211715 |
| O | -1.624657 | 2.405222  | -1.668724 |
| N | -2.619289 | 2.782800  | -2.514297 |
| C | -3.040260 | 4.108813  | -2.605494 |
| O | -2.539029 | 5.028420  | -2.006642 |
| C | -4.195794 | 4.129073  | -3.577602 |
| H | -5.076405 | 4.492083  | -3.044096 |
| H | -3.976181 | 4.832921  | -4.380867 |
| C | -3.326804 | 1.886751  | -3.290855 |
| O | -3.125915 | 0.688919  | -3.323568 |
| C | -4.350992 | 2.679264  | -4.061264 |
| H | -5.337245 | 2.260571  | -3.856515 |
| H | -4.149407 | 2.560419  | -5.127480 |
| H | 0.196287  | -0.557502 | 1.111029  |
| H | 0.766478  | -1.904699 | 0.130724  |
| H | 0.273777  | 0.513744  | -1.013749 |
| H | -2.216796 | 0.069835  | -1.730506 |
| H | 0.900152  | -1.441207 | -2.398587 |
| H | -0.755139 | -2.064218 | -2.308866 |
| H | -0.428710 | -0.534494 | -3.137909 |
| H | -0.876145 | 0.142858  | 6.038753  |
| H | 2.440700  | 2.039479  | 4.093205  |
| H | 1.123684  | 2.276778  | 2.041237  |
| H | -2.212553 | 0.389307  | 3.967322  |
| H | 1.468222  | 0.977806  | 6.110298  |

(R)-1d-(S)-2c RC, toluene, 233 K

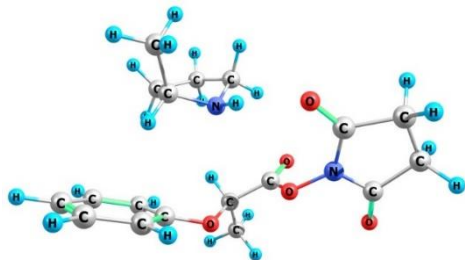

$E_{FSP} = -1185.81263965$   $E_{T233} = -1185.393969$ ,

$H_{233} = -1185.392631$   $G_{233} = -1185.444391$

Imaginary frequency = 0

|   |           |           |           |
|---|-----------|-----------|-----------|
| C | 0.716027  | 0.266087  | -2.736098 |
| C | -0.715615 | 0.773240  | -2.478297 |
| C | 1.108180  | -0.492580 | -1.439738 |
| H | 1.404458  | -1.525574 | -1.632695 |
| H | 1.948471  | 0.000705  | -0.949290 |
| C | -0.134506 | -0.420878 | -0.531494 |
| H | 0.159795  | -0.269582 | 0.508450  |
| N | -0.807572 | 0.794680  | -1.015970 |
| C | 0.655535  | 0.048340  | 3.502831  |
| C | 1.938927  | -0.327907 | 3.112613  |
| C | 2.618796  | 0.444065  | 2.178393  |
| C | 2.030540  | 1.579574  | 1.627670  |
| C | 0.741900  | 1.940565  | 2.014926  |
| C | 0.054523  | 1.172668  | 2.954303  |
| O | 0.088355  | 3.048020  | 1.546599  |
| O | 0.375022  | 3.523632  | 0.239048  |
| C | 1.172927  | 4.824270  | 0.298581  |
| H | 2.121153  | 4.640324  | 0.805730  |
| H | 1.372866  | 5.193700  | -0.708069 |
| H | 0.619600  | 5.582951  | 0.854777  |
| H | 0.903208  | 2.761971  | -0.334998 |
| C | -0.917351 | 3.737010  | -0.534938 |
| O | -2.029244 | 3.624381  | 0.289280  |
| N | -3.219326 | 3.846454  | -0.357913 |
| C | -4.057916 | 2.795350  | -0.703817 |
| C | -5.319313 | 3.427271  | -1.253755 |
| H | -5.486671 | 3.048313  | -2.262494 |
| H | -6.159227 | 3.104167  | -0.636917 |
| O | -3.795186 | 1.626493  | -0.571464 |
| C | -3.704599 | 5.133212  | -0.602719 |
| C | -5.084265 | 4.945383  | -1.204037 |
| H | -5.803711 | 5.470418  | -0.574542 |
| H | -5.102497 | 5.414590  | -2.188204 |
| O | -3.108829 | 6.148374  | -0.361355 |
| O | -0.985075 | 4.029088  | -1.689706 |
| H | 1.392444  | 1.105679  | -2.907757 |
| H | 0.762028  | -0.372096 | -3.619809 |
| H | -0.891853 | 1.772290  | -2.881574 |
| H | -1.768392 | 0.857730  | -0.695956 |
| H | 0.110623  | -0.547899 | 4.224905  |
| H | 3.616295  | 0.160366  | 1.863811  |
| H | 2.581143  | 2.170094  | 0.907939  |
| H | -0.948939 | 1.467557  | 3.233537  |
| H | 2.403340  | -1.210039 | 3.535230  |
| H | -1.449353 | 0.098666  | -2.942147 |
| C | -1.005898 | -1.682126 | -0.605014 |
| H | -1.319941 | -1.903365 | -1.629578 |
| H | -0.458674 | -2.550141 | -0.225471 |
| H | -1.905887 | -1.559521 | 0.004775  |

(R)-1d-(S)-2c TS, toluene, 233 K

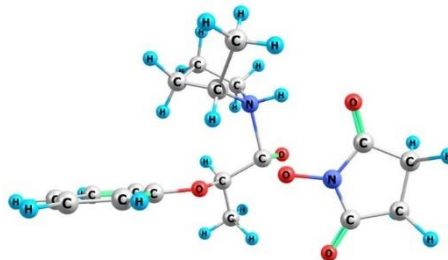

$E_{FSP} = -1185.80565837$   $E_{T233} = -1185.384595$ ,

$H_{233} = -1185.383857$   $G_{233} = -1185.434836$

Imaginary frequency = 1

|   |           |           |           |
|---|-----------|-----------|-----------|
| C | -0.886171 | -0.397104 | -3.180979 |
| C | -1.209206 | 1.024062  | -2.731497 |
| C | 0.246586  | -0.778650 | -2.223725 |
| H | 0.421643  | -1.853763 | -2.169006 |
| H | 1.180002  | -0.304914 | -2.537185 |
| C | -0.211455 | -0.206005 | -0.871669 |
| H | 0.626759  | 0.149104  | -0.284156 |
| N | -1.041473 | 1.005001  | -1.248959 |
| C | 4.584638  | 0.192271  | -1.547398 |
| C | 4.976580  | 0.818164  | -2.730098 |
| C | 4.262537  | 1.920386  | -3.180595 |
| C | 3.153980  | 2.393824  | -2.480881 |
| C | 2.756492  | 1.750198  | -1.308336 |
| C | 3.484682  | 0.652487  | -0.839815 |
| O | 1.666616  | 2.097856  | -0.566419 |
| C | 0.730001  | 3.037844  | -1.097607 |
| C | 1.091821  | 4.465209  | -0.701128 |
| H | 2.128900  | 4.671646  | -0.973773 |
| H | 0.444399  | 5.171354  | -1.220895 |
| H | 0.966499  | 4.604965  | 0.372353  |
| H | 0.712090  | 2.938183  | -2.183615 |
| C | -0.695936 | 2.706166  | -0.631299 |
| O | -0.639301 | 2.363112  | 0.839073  |
| N | -1.735563 | 2.854526  | 1.475600  |
| C | -2.953781 | 2.204338  | 1.467264  |
| C | -3.919200 | 3.068836  | 2.247291  |
| H | -4.833244 | 3.192408  | 1.666895  |
| H | -4.178884 | 2.544933  | 3.169873  |
| O | -3.167547 | 1.136480  | 0.935692  |
| C | -1.744782 | 4.128326  | 2.045656  |
| C | -3.166182 | 4.382107  | 2.508075  |
| H | -3.169598 | 4.700719  | 3.550606  |
| H | -3.556238 | 5.208148  | 1.910014  |
| O | -0.786773 | 4.852862  | 2.124304  |
| O | -1.627208 | 3.405551  | -1.010399 |
| H | -0.597232 | -0.445343 | -4.231928 |
| H | -1.750434 | -1.050388 | -3.035431 |
| H | -0.476093 | 1.715889  | -3.147894 |
| H | -1.949051 | 0.923264  | -0.793288 |
| H | 5.135651  | -0.663331 | -1.175590 |
| H | 4.565805  | 2.427485  | -4.088997 |
| H | 2.625714  | 3.261276  | -2.849315 |
| H | 3.164404  | 0.168388  | 0.074149  |
| H | 5.830893  | 0.453101  | -3.286003 |
| H | -2.198909 | 1.388446  | -2.995861 |
| C | -1.031333 | -1.186676 | -0.043555 |
| H | -1.935651 | -1.501363 | -0.572175 |
| H | -0.431802 | -2.075085 | 0.166738  |
| H | -1.334932 | -0.738512 | 0.902619  |

(R)-1d-(R)-2c RC, toluene, 233 K

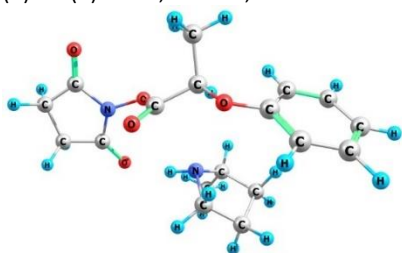

$E_{FSP} = -1185.814659518$   $E_{t_{233}} = -1185.394483$ ,

$H_{233} = -1185.393745$   $G_{233} = -1185.446079$

Imaginary frequency = 0

|   |           |           |           |
|---|-----------|-----------|-----------|
| C | -0.059524 | -1.434190 | 0.679043  |
| C | -0.198224 | -0.555929 | -0.573237 |
| C | -1.482531 | -1.967281 | 0.904599  |
| H | -1.650879 | -2.859324 | 0.296266  |
| H | -1.670076 | -2.239543 | 1.944916  |
| C | -2.385853 | -0.815019 | 0.429836  |
| H | -3.256393 | -1.187648 | -0.117849 |
| H | -2.761827 | -0.230430 | 1.273900  |
| N | -1.536961 | 0.043024  | -0.424218 |
| C | -0.044424 | -1.340655 | -1.881022 |
| C | -0.283170 | -0.056094 | 4.469312  |
| C | 1.080469  | 0.198974  | 4.331403  |
| C | 1.501991  | 1.144882  | 3.405706  |
| C | 0.583684  | 1.831176  | 2.615397  |
| C | -0.777480 | 1.556696  | 2.748004  |
| C | -1.208856 | 0.616802  | 3.687036  |
| O | -1.761547 | 2.160477  | 2.019009  |
| C | -1.400543 | 2.894772  | 0.863797  |
| C | -1.253623 | 4.384267  | 1.178875  |
| H | -0.468960 | 4.524320  | 1.923061  |
| H | -0.991400 | 4.943740  | 0.279867  |
| H | -2.189826 | 4.774474  | 1.581940  |
| H | -0.488761 | 2.492271  | 0.424776  |
| C | -2.495825 | 2.683191  | -0.162468 |
| O | -3.639200 | 2.401243  | -0.007814 |
| O | -1.953021 | 3.023126  | -1.412664 |
| N | -2.878413 | 3.069729  | -2.420601 |
| C | -3.564162 | 4.248564  | -2.719737 |
| O | -3.482118 | 5.265292  | -2.083725 |
| C | -4.356932 | 3.957233  | -3.976773 |
| H | -5.404193 | 4.206938  | -3.805699 |
| H | -3.981531 | 4.612703  | -4.765007 |
| C | -3.097940 | 1.998455  | -3.273975 |
| O | -2.561199 | 0.922128  | -3.191844 |
| C | -4.117616 | 2.470008  | -4.285425 |
| H | -5.016716 | 1.863711  | -4.160444 |
| H | -3.727029 | 2.285129  | -5.286754 |
| H | 0.258890  | -0.826563 | 1.528013  |
| H | 0.674792  | -2.230082 | 0.540809  |
| H | 0.555743  | 0.241242  | -0.564209 |
| H | -1.956204 | 0.205887  | -1.330376 |
| H | 0.977264  | -1.715358 | -1.997925 |
| H | -0.726562 | -2.195200 | -1.912633 |
| H | -0.274442 | -0.699661 | -2.736165 |
| H | -0.628698 | -0.788885 | 5.188303  |
| H | 2.556630  | 1.366218  | 3.291179  |
| H | 0.943975  | 2.568081  | 1.912412  |
| H | -2.269192 | 0.418187  | 3.778951  |
| H | 1.801541  | -0.329452 | 4.941707  |

(R)-1d-(S)-2c TS, toluene, 233 K

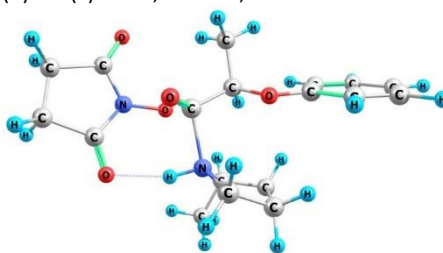

$E_{FSP} = -1185.808719504$   $E_{t_{233}} = -1185.388162$ ,

$H_{233} = -1185.387428$   $G_{233} = -1185.436925$

Imaginary frequency = 1

|   |           |           |           |
|---|-----------|-----------|-----------|
| C | 0.010533  | -0.971628 | 0.323430  |
| C | -0.366802 | -0.318870 | -1.010179 |
| C | -1.288340 | -1.636630 | 0.821289  |
| H | -1.301885 | -2.698613 | 0.571729  |
| H | -1.384986 | -1.555200 | 1.903250  |
| C | -2.435560 | -0.908566 | 0.094003  |
| H | -3.036153 | -1.598246 | -0.501312 |
| H | -3.103932 | -0.368497 | 0.760883  |
| N | -1.790752 | 0.079396  | -0.813779 |
| C | -0.236244 | -1.256877 | -2.207839 |
| C | -0.384010 | 0.319591  | 5.039882  |
| C | 0.914425  | 0.824356  | 5.088901  |
| C | 1.390984  | 1.565649  | 4.016205  |
| C | 0.593748  | 1.810656  | 2.899680  |
| C | -0.701836 | 1.296260  | 2.856830  |
| C | -1.187166 | 0.552094  | 3.935874  |
| O | -1.563433 | 1.427431  | 1.811831  |
| C | -1.240668 | 2.264499  | 0.699804  |
| C | -1.443526 | 3.735373  | 1.038224  |
| H | -0.789079 | 4.029168  | 1.859372  |
| H | -1.224076 | 4.355540  | 0.169236  |
| H | -2.479889 | 3.900351  | 1.337188  |
| H | -0.215078 | 2.081322  | 0.372637  |
| C | -2.212281 | 1.829711  | -0.402882 |
| O | -3.422417 | 1.902055  | -0.297964 |
| O | -1.581832 | 2.404665  | -1.689961 |
| N | -2.550651 | 2.793679  | -2.553896 |
| C | -2.968682 | 4.123389  | -2.640400 |
| O | -2.464548 | 5.041998  | -2.048109 |
| C | -4.132495 | 4.146925  | -3.607764 |
| H | -5.007707 | 4.510900  | -3.066200 |
| H | -3.919329 | 4.853802  | -4.410153 |
| C | -3.270608 | 1.900965  | -3.319164 |
| O | -3.084401 | 0.700785  | -3.350300 |
| C | -4.293616 | 2.697578  | -4.091598 |
| H | -5.280049 | 2.280203  | -3.884996 |
| H | -4.096228 | 2.575786  | -5.158431 |
| H | 0.352839  | -0.218756 | 1.031232  |
| H | 0.823010  | -1.688148 | 0.197585  |
| H | 0.211334  | 0.584371  | -1.207672 |
| H | -2.265349 | 0.098213  | -1.719152 |
| H | 0.812188  | -1.519991 | -2.367168 |
| H | -0.797270 | -2.181557 | -2.048061 |
| H | -0.611856 | -0.777536 | -3.114670 |
| H | -0.776770 | -0.258794 | 5.867702  |
| H | 2.395410  | 1.971326  | 4.041950  |
| H | 0.992336  | 2.396966  | 2.084559  |
| H | -2.196844 | 0.163998  | 3.884855  |
| H | 1.542672  | 0.640539  | 5.951072  |

(R)-1d-(S)-2c RC, :N eq

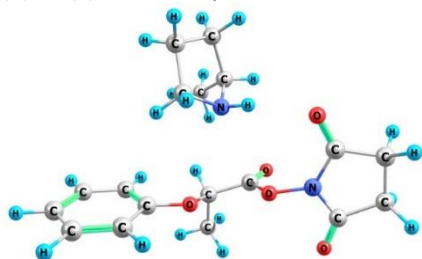

$E_{FSF} = -1185.82161744$   $E_{T_{293}} = -1185.393229$ ,  
 $H_{T_{293}} = -1185.392301$   $G_{T_{293}} = -1185.468491$   
 $E_{T_{253}} = -1185.398688$ ,  
 $H_{T_{253}} = -1185.397887$   $G_{T_{253}} = -1185.459145$   
Imaginary frequency = 0

|   |           |           |           |
|---|-----------|-----------|-----------|
| C | -0.546188 | -1.780724 | -2.972033 |
| H | 1.452324  | -1.293108 | -0.956285 |
| O | -0.520439 | -2.974072 | -2.929291 |
| C | -0.080451 | -0.948292 | -4.148063 |
| H | 0.918295  | -1.320201 | -4.371028 |
| C | -1.028783 | -1.176925 | -5.326098 |
| H | -1.038722 | -2.233208 | -5.598578 |
| H | -2.039732 | -0.858585 | -5.064837 |
| H | -0.686818 | -0.599017 | -6.185007 |
| O | -0.045307 | 0.421864  | -3.776794 |
| C | 0.690836  | 1.295010  | -4.530630 |
| C | 1.640073  | 0.923629  | -5.483421 |
| H | 1.847647  | -0.113724 | -5.703402 |
| C | 2.338845  | 1.913197  | -6.174127 |
| H | 3.072328  | 1.616982  | -6.914556 |
| C | 2.102707  | 3.259641  | -5.927097 |
| H | 2.646231  | 4.019704  | -6.473911 |
| C | 0.451334  | 2.646568  | -4.275733 |
| H | -0.291062 | 2.913536  | -3.534145 |
| C | 1.153353  | 3.619808  | -4.970276 |
| H | 0.950496  | 4.664444  | -4.764946 |
| C | 2.813176  | -0.057903 | -1.853229 |
| C | 2.915037  | -2.420834 | -1.819241 |
| C | 4.109100  | -1.941237 | -0.968141 |
| C | 4.213415  | -0.433581 | -1.288023 |
| H | 2.902302  | 0.303164  | -2.880402 |
| H | 3.871582  | -2.089646 | 0.089096  |
| H | 5.033359  | -2.482278 | -1.182396 |
| H | 4.465419  | 0.149689  | -0.400649 |
| H | 4.989650  | -0.239192 | -2.031454 |
| N | 1.985068  | -1.277539 | -1.819076 |
| H | 2.322169  | 0.730168  | -1.280616 |
| H | 2.409918  | -3.273706 | -1.359215 |
| C | 3.324543  | -2.796763 | -3.244175 |
| H | 4.034207  | -3.628397 | -3.236576 |
| H | 2.452479  | -3.099535 | -3.827116 |
| H | 3.804633  | -1.956289 | -3.753957 |
| O | -1.170574 | -1.004832 | -2.000254 |
| N | -1.783273 | -1.756984 | -1.028446 |
| C | -1.179146 | -2.037412 | 0.189186  |
| O | -0.057000 | -1.714106 | 0.496513  |
| C | -3.080604 | -2.240817 | -1.197119 |
| O | -3.734529 | -2.092739 | -2.198093 |
| C | -2.201940 | -2.798645 | 0.999862  |
| H | -1.768092 | -3.754153 | 1.296846  |
| H | -2.408749 | -2.230561 | 1.908188  |
| C | -3.434586 | -2.945620 | 0.092063  |
| H | -3.677467 | -3.983896 | -0.138486 |
| H | -4.327960 | -2.477582 | 0.507856  |

(R)-1d-(S)-2c TS, :N eq

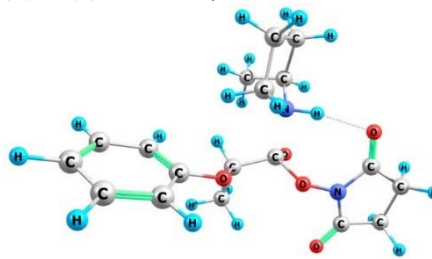

$E_{FSF} = -1185.81291339$   $E_{T_{293}} = -1185.384262$ ,  
 $H_{T_{293}} = -1185.383334$   $G_{T_{293}} = -1185.454712$   
 $E_{T_{253}} = -1185.389531$ ,  
 $H_{T_{253}} = -1185.388729$   $G_{T_{253}} = -1185.445812$   
Imaginary frequency = 1

|   |           |           |           |
|---|-----------|-----------|-----------|
| C | 0.107041  | -1.717554 | -2.725020 |
| H | 1.248673  | -1.432460 | -0.867538 |
| O | -0.095992 | -2.924707 | -2.737573 |
| C | 0.241127  | -0.921377 | -4.030768 |
| H | 1.205447  | -1.210069 | -4.447851 |
| C | -0.871821 | -1.269051 | -5.006658 |
| H | -0.846262 | -2.332694 | -5.245195 |
| H | -1.842228 | -1.023562 | -4.572320 |
| H | -0.736267 | -0.699739 | -5.928221 |
| O | 0.222838  | 0.477     | -3.740949 |
| C | 0.842570  | 1.359954  | -4.576948 |
| C | 1.735641  | 1.013968  | -5.592232 |
| H | 1.970097  | -0.016974 | -5.815313 |
| C | 2.339964  | 2.021478  | -6.344677 |
| H | 3.031446  | 1.743705  | -7.131318 |
| C | 2.063531  | 3.360472  | -6.101808 |
| H | 2.535258  | 4.133062  | -6.695614 |
| C | 0.558406  | 2.706032  | -4.331568 |
| H | -0.139976 | 2.953271  | -3.541861 |
| C | 1.164268  | 3.696232  | -5.088854 |
| H | 0.928620  | 4.734535  | -4.886342 |
| C | 2.447963  | -0.144585 | -1.912690 |
| C | 2.648282  | -2.523239 | -1.866177 |
| C | 3.772009  | -1.984622 | -0.969864 |
| C | 3.813568  | -0.464498 | -1.259879 |
| H | 2.571255  | 0.118561  | -2.959260 |
| H | 3.514068  | -2.164237 | 0.076609  |
| H | 4.723109  | -2.477651 | -1.171254 |
| H | 3.965769  | 0.109095  | -0.345749 |
| H | 4.621734  | -0.209165 | -1.945984 |
| N | 1.656683  | -1.403236 | -1.807001 |
| H | 1.899039  | 0.658549  | -1.426625 |
| H | 2.169125  | -3.403469 | -1.440969 |
| C | 3.108783  | -2.825621 | -3.287653 |
| H | 3.839034  | -3.636771 | -3.257482 |
| H | 2.276971  | -3.146463 | -3.913714 |
| H | 3.595720  | -1.964683 | -3.752251 |
| O | -0.798112 | -0.881740 | -1.808223 |
| N | -1.504846 | -1.666843 | -0.955516 |
| C | -0.985402 | -2.128500 | 0.235253  |
| O | 0.158472  | -1.941792 | 0.608598  |
| C | -2.808792 | -2.081626 | -1.230707 |
| O | -3.409735 | -1.828050 | -2.245671 |
| C | -2.086214 | -2.875155 | 0.946899  |
| H | -1.733375 | -3.876376 | 1.196398  |
| H | -2.301575 | -2.356991 | 1.883461  |
| C | -3.276291 | -2.866149 | -0.024472 |
| H | -3.570396 | -3.864169 | -0.352528 |
| H | -4.160128 | -2.376795 | 0.387769  |



(R)-1d-(R)-2c RC, :N eq

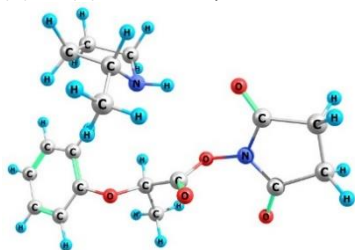

$E_{FSP} = -1185.82201923$   $E_{T_{293}} = -1185.394973$ ,

$H_{293} = -1185.394045$   $G_{293} = -1185.468832$

$E_{T_{253}} = -1185.400313$ ,

$H_{253} = -1185.399951$   $G_{253} = -1185.459670$

Imaginary frequency = 0

|   |          |          |           |
|---|----------|----------|-----------|
| O | 1.126512 | 3.897456 | -1.879845 |
| H | 3.842363 | 1.905256 | -0.655785 |
| O | 3.157760 | 3.658805 | -2.883078 |
| N | 2.582145 | 2.739315 | -3.721456 |
| C | 2.651230 | 1.373622 | -3.479483 |
| O | 3.162571 | 0.872997 | -2.507265 |
| C | 1.974762 | 0.709472 | -4.657323 |
| H | 2.682132 | 0.024121 | -5.125134 |
| H | 1.136396 | 0.121018 | -4.281802 |
| C | 1.952260 | 3.130000 | -4.902204 |
| O | 1.809289 | 4.277464 | -5.241571 |
| C | 1.534607 | 1.851106 | -5.590778 |
| H | 0.456800 | 1.878655 | -5.755957 |
| H | 2.022350 | 1.810950 | -6.565914 |
| C | 2.979548 | 5.390501 | -1.319818 |
| H | 3.989231 | 5.045358 | -1.086520 |
| C | 3.029846 | 6.593578 | -2.265186 |
| H | 3.563549 | 6.338722 | -3.181554 |
| H | 2.018735 | 6.918234 | -2.517387 |
| H | 3.554469 | 7.411684 | -1.770172 |
| O | 2.277567 | 5.704590 | -0.120157 |
| C | 3.046969 | 6.368152 | 0.821227  |
| C | 4.127947 | 5.731630 | 1.426369  |
| H | 4.362053 | 4.709607 | 1.153338  |
| C | 4.880044 | 6.421062 | 2.371460  |
| H | 5.723997 | 5.931414 | 2.842894  |
| C | 4.547366 | 7.727866 | 2.721904  |
| H | 5.138502 | 8.261349 | 3.456034  |
| C | 2.699411 | 7.668185 | 1.167434  |
| H | 1.854999 | 8.138874 | 0.679446  |
| C | 3.452808 | 8.345878 | 2.122636  |
| H | 3.182359 | 9.359013 | 2.395894  |
| C | 3.248412 | 1.724206 | 1.316959  |
| C | 1.826889 | 2.265618 | 1.293869  |
| H | 1.245600 | 1.842799 | 2.117935  |
| H | 1.827654 | 3.354456 | 1.386564  |
| H | 1.321038 | 2.007469 | 0.360043  |
| C | 5.466923 | 1.942617 | 0.607002  |
| H | 6.179257 | 2.569946 | 0.066197  |
| C | 5.519070 | 2.154904 | 2.132922  |
| C | 4.042158 | 2.072168 | 2.588687  |
| H | 6.145180 | 1.402301 | 2.613301  |
| H | 5.945667 | 3.129997 | 2.375952  |
| H | 3.884450 | 1.330671 | 3.373304  |
| H | 3.705981 | 3.035873 | 2.979277  |
| N | 4.086371 | 2.295551 | 0.250152  |
| H | 3.206029 | 0.624375 | 1.227045  |
| H | 5.699984 | 0.893114 | 0.366481  |

(R)-1d-(R)-2c TS, :N eq

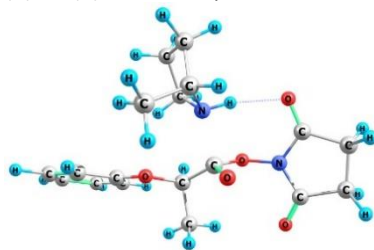

$E_{FSP} = -1185.81392148$   $E_{T_{293}} = -1185.385569$ ,

$H_{293} = -1185.384642$   $G_{293} = -1185.457262$

$E_{T_{253}} = -1185.39085991$ ,

$H_{253} = -1185.390059$   $G_{253} = -1185.448225$

Imaginary frequency = 1

|   |          |           |           |
|---|----------|-----------|-----------|
| C | 2.718545 | 3.721063  | -1.444999 |
| O | 1.539546 | 3.476398  | -1.590850 |
| H | 3.565138 | 1.763220  | -0.801217 |
| O | 3.684396 | 3.243671  | -2.544885 |
| N | 3.080287 | 2.444728  | -3.458641 |
| C | 2.945716 | 1.082817  | -3.280630 |
| O | 3.303807 | 0.484274  | -2.285324 |
| C | 2.289428 | 0.532228  | -4.523544 |
| H | 2.949197 | -0.213489 | -4.969105 |
| H | 1.366270 | 0.028278  | -4.233500 |
| C | 2.568851 | 2.940785  | -4.656107 |
| O | 2.576966 | 4.105771  | -4.972244 |
| C | 2.053985 | 1.748905  | -5.432007 |
| H | 1.002408 | 1.912852  | -5.670570 |
| H | 2.603258 | 1.686013  | -6.372688 |
| C | 3.311863 | 5.096973  | -1.107458 |
| H | 4.399347 | 5.015138  | -1.148078 |
| C | 2.798515 | 6.120613  | -2.113432 |
| H | 3.099062 | 5.841334  | -3.123036 |
| H | 1.708986 | 6.157498  | -2.065820 |
| H | 3.196802 | 7.108753  | -1.881360 |
| O | 2.893602 | 5.434979  | 0.212028  |
| C | 3.574462 | 6.386345  | 0.914954  |
| C | 4.719239 | 7.044603  | 0.463981  |
| H | 5.136713 | 6.840765  | -0.511140 |
| C | 5.332485 | 7.993676  | 1.280469  |
| H | 6.218787 | 8.500608  | 0.917500  |
| C | 4.820705 | 8.296181  | 2.535445  |
| H | 5.302938 | 9.036284  | 3.161500  |
| C | 3.054231 | 6.686932  | 2.177370  |
| H | 2.161592 | 6.172928  | 2.510256  |
| C | 3.673435 | 7.636505  | 2.976357  |
| H | 3.254348 | 7.867984  | 3.948670  |
| C | 2.416956 | 1.958089  | 0.850341  |
| C | 1.732506 | 3.016544  | 1.700651  |
| H | 1.058012 | 2.514305  | 2.398658  |
| H | 2.449825 | 3.599663  | 2.280900  |
| H | 1.156668 | 3.703836  | 1.084424  |
| C | 4.678957 | 2.743450  | 0.601805  |
| H | 4.752341 | 3.787441  | 0.898476  |
| C | 4.629474 | 1.812124  | 1.837591  |
| C | 3.312108 | 1.024202  | 1.678738  |
| H | 5.493546 | 1.148771  | 1.877998  |
| H | 4.624746 | 2.405588  | 2.753072  |
| H | 3.490205 | 0.098600  | 1.125682  |
| H | 2.855782 | 0.761220  | 2.634256  |
| N | 3.399116 | 2.515687  | -0.130072 |
| H | 1.668772 | 1.409459  | 0.278394  |
| H | 5.505265 | 2.514869  | -0.069469 |

(R)-1d-(S)-2a AAS, :N eq

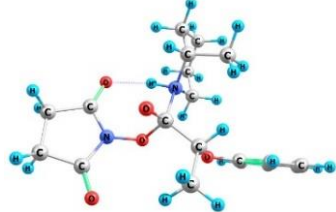

$E_{FSP} = -1225.12243888$   $E_{t_{293}} = -1224.662637$ ,  
 $H_{293} = -1224.6617095$   $G_{293} = -1224.735876$   
 $E_{t_{253}} = -1224.668272$ ,  
 $H_{253} = -1224.667471$   $G_{253} = -1224.726641$   
Imaginary frequency = 0

|   |           |           |           |
|---|-----------|-----------|-----------|
| C | 2.479600  | 1.428872  | -1.377994 |
| H | 2.524459  | 0.167538  | 0.257575  |
| O | 2.774300  | 0.583649  | -2.226964 |
| C | 2.713509  | 2.915910  | -1.700639 |
| H | 3.794546  | 3.054503  | -1.680374 |
| C | 2.170905  | 3.253275  | -3.082648 |
| H | 2.667690  | 2.643378  | -3.836423 |
| H | 1.099406  | 3.055338  | -3.124854 |
| H | 2.356207  | 4.305717  | -3.307273 |
| O | 2.119801  | 3.747457  | -0.699820 |
| C | 2.746370  | 4.896573  | -0.314972 |
| C | 3.823676  | 5.478721  | -0.983933 |
| H | 4.220051  | 5.045560  | -1.890816 |
| C | 4.395424  | 6.647062  | -0.482688 |
| H | 5.230622  | 7.090651  | -1.011977 |
| C | 3.900523  | 7.248036  | 0.667633  |
| H | 4.351664  | 8.154831  | 1.051061  |
| C | 2.238939  | 5.502313  | 0.838519  |
| H | 1.401259  | 5.039296  | 1.345134  |
| C | 2.814268  | 6.667906  | 1.322368  |
| H | 2.413285  | 7.126104  | 2.218823  |
| C | 2.910984  | 1.865456  | 1.303936  |
| C | 4.525851  | 0.457174  | 0.003751  |
| C | 4.806380  | -0.355159 | 1.274228  |
| C | 4.616944  | 0.469622  | 2.550462  |
| C | 3.216867  | 1.084738  | 2.580913  |
| H | 3.545652  | 2.743932  | 1.216516  |
| H | 4.131043  | -1.217410 | 1.294447  |
| H | 5.823144  | -0.749867 | 1.211408  |
| H | 4.773238  | -0.164849 | 3.426182  |
| H | 5.368614  | 1.264289  | 2.599375  |
| H | 2.469407  | 0.292076  | 2.699984  |
| H | 3.098783  | 1.761937  | 3.430643  |
| N | 3.121390  | 0.994965  | 0.107286  |
| H | 1.876054  | 2.192355  | 1.282826  |
| H | 4.495544  | -0.217581 | -0.850442 |
| C | 5.563628  | 1.541516  | -0.263455 |
| H | 6.555376  | 1.090508  | -0.191252 |
| H | 5.462471  | 1.954875  | -1.266805 |
| H | 5.522365  | 2.361488  | 0.453149  |
| O | 0.932081  | 1.374756  | -0.898937 |
| N | 0.332188  | 0.257160  | -1.361493 |
| C | 0.561369  | -0.994551 | -0.834431 |
| O | 1.332035  | -1.227391 | 0.081727  |
| C | -0.522302 | 0.273309  | -2.462601 |
| O | -0.786312 | 1.257487  | -3.110050 |
| C | -0.290999 | -1.977502 | -1.593558 |
| H | 0.362217  | -2.729383 | -2.038648 |
| H | -0.956387 | -2.484493 | -0.892894 |
| C | -1.034411 | -1.138097 | -2.639805 |
| H | -0.840036 | -1.457402 | -3.664227 |
| H | -2.114945 | -1.135385 | -2.482785 |

(R)-1d-(S)-2a TS2, :N eq

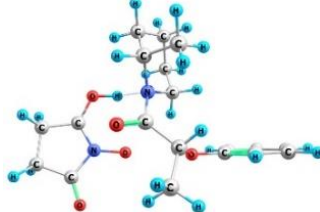

$E_{FSP} = -1225.1040819$   $E_{t_{293}} = -1224.649804$ ,  
 $H_{293} = -1224.648876$   $G_{293} = -1224.722134$   
 $E_{t_{253}} = -1224.655363$ ,  
 $H_{253} = -1224.654562$   $G_{253} = -1224.713015$   
Imaginary frequency = 1

|   |           |           |           |
|---|-----------|-----------|-----------|
| C | 2.975112  | 1.551571  | -1.426594 |
| H | 2.210096  | 0.077337  | 0.002551  |
| O | 2.993275  | 0.741075  | -2.324504 |
| C | 3.004525  | 3.052181  | -1.764128 |
| H | 4.067288  | 3.302404  | -1.647659 |
| C | 2.569805  | 3.309921  | -3.197034 |
| H | 3.175704  | 2.735482  | -3.895852 |
| H | 1.524112  | 3.023196  | -3.318241 |
| H | 2.685656  | 4.371105  | -3.425827 |
| O | 2.239033  | 3.843113  | -0.862747 |
| C | 2.764590  | 5.001012  | -0.361881 |
| C | 3.865898  | 5.667479  | -0.898203 |
| H | 4.370659  | 5.298009  | -1.779397 |
| C | 4.314603  | 6.842496  | -0.298634 |
| H | 5.169511  | 7.355017  | -0.723620 |
| C | 3.674862  | 7.363300  | 0.819323  |
| H | 4.033777  | 8.275307  | 1.279808  |
| C | 2.110727  | 5.524557  | 0.756451  |
| H | 1.255419  | 4.994513  | 1.156316  |
| C | 2.564703  | 6.698705  | 1.339517  |
| H | 2.051949  | 7.093657  | 2.208496  |
| C | 3.065288  | 1.981117  | 1.074887  |
| C | 4.517153  | 0.258848  | -0.038720 |
| C | 4.585957  | -0.512594 | 1.280138  |
| C | 4.443798  | 0.398348  | 2.499393  |
| C | 3.149082  | 1.203241  | 2.386756  |
| H | 3.822575  | 2.769147  | 1.053707  |
| H | 3.790115  | -1.262260 | 1.292997  |
| H | 5.534283  | -1.055590 | 1.302399  |
| H | 4.445149  | -0.202615 | 3.412308  |
| H | 5.297528  | 1.080915  | 2.566410  |
| H | 2.290699  | 0.526059  | 2.458246  |
| H | 3.057002  | 1.920221  | 3.206794  |
| N | 3.229557  | 1.064121  | -0.083551 |
| H | 2.090861  | 2.444589  | 0.973767  |
| H | 4.429246  | -0.456808 | -0.853943 |
| C | 5.748398  | 1.130211  | -0.282452 |
| H | 6.644376  | 0.514987  | -0.173602 |
| H | 5.751047  | 1.544454  | -1.293084 |
| H | 5.826676  | 1.956014  | 0.425689  |
| O | 0.517050  | 1.568651  | -0.928949 |
| N | 0.093438  | 0.388197  | -1.338    |
| C | 0.583338  | -0.763768 | -0.849307 |
| O | 1.558699  | -0.836640 | -0.028524 |
| C | -0.951785 | 0.167546  | -2.245742 |
| O | -1.525751 | 1.061141  | -2.812864 |
| C | -0.135241 | -1.944186 | -1.402077 |
| H | 0.575285  | -2.601796 | -1.907546 |
| H | -0.596350 | -2.513013 | -0.590921 |
| C | -1.162418 | -1.322381 | -2.357070 |
| H | -1.008930 | -1.628394 | -3.393373 |
| H | -2.192690 | -1.557937 | -2.084680 |

(R)-1d-(R)-2a AAS, :N eq

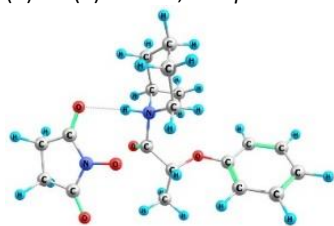

$E_{FSP} = -1225.12614072$   $E_{t_{293}} = -1224.666381$ ,

$H_{293} = -1224.665453$   $G_{293} = -1224.739739$

$E_{t_{253}} = -1224.672036$ ,

$H_{253} = -1224.671234$   $G_{253} = -1224.730490$

Imaginary frequency = 0

|   |          |           |           |
|---|----------|-----------|-----------|
| C | 2.553020 | 3.577795  | -0.945989 |
| O | 1.487788 | 3.266312  | -1.424792 |
| H | 3.431671 | 1.792610  | -0.526622 |
| O | 3.992324 | 3.083289  | -2.231137 |
| N | 3.403411 | 2.313109  | -3.142477 |
| C | 3.059023 | 1.006902  | -2.889887 |
| O | 3.266548 | 0.449137  | -1.818484 |
| C | 2.405608 | 0.436459  | -4.121984 |
| H | 3.006900 | -0.395919 | -4.492302 |
| H | 1.425206 | 0.040591  | -3.852016 |
| C | 2.989623 | 2.773145  | -4.388529 |
| O | 3.151887 | 3.907384  | -4.783649 |
| C | 2.337952 | 1.612511  | -5.107822 |
| H | 1.315956 | 1.892219  | -5.369368 |
| H | 2.876058 | 1.421716  | -6.037695 |
| C | 3.052541 | 5.020293  | -0.823924 |
| H | 4.139838 | 5.023344  | -0.815785 |
| C | 2.516565 | 5.868116  | -1.960554 |
| H | 2.887463 | 5.486486  | -2.911348 |
| H | 1.426333 | 5.836751  | -1.964203 |
| H | 2.841822 | 6.901800  | -1.835048 |
| O | 2.558020 | 5.490642  | 0.441044  |
| C | 3.282126 | 6.406125  | 1.153066  |
| C | 4.384194 | 7.101612  | 0.655967  |
| H | 4.730728 | 6.957594  | -0.357356 |
| C | 5.046833 | 8.011721  | 1.477968  |
| H | 5.900897 | 8.548376  | 1.082394  |
| C | 4.621259 | 8.241098  | 2.780047  |
| H | 5.141742 | 8.951320  | 3.409876  |
| C | 2.847451 | 6.632694  | 2.461578  |
| H | 1.989945 | 6.083818  | 2.830219  |
| C | 3.512033 | 7.548627  | 3.264595  |
| H | 3.160778 | 7.723504  | 4.274802  |
| C | 2.028586 | 1.917615  | 0.963094  |
| C | 1.356955 | 2.916403  | 1.891219  |
| H | 0.561754 | 2.393566  | 2.426787  |
| H | 2.039680 | 3.332664  | 2.632269  |
| H | 0.912546 | 3.739240  | 1.334116  |
| C | 4.323567 | 2.973829  | 0.895243  |
| H | 4.018987 | 3.751635  | 1.591214  |
| C | 4.916888 | 1.773897  | 1.626525  |
| C | 3.877205 | 1.080159  | 2.508136  |
| C | 2.642063 | 0.710649  | 1.682674  |
| H | 5.313932 | 1.065911  | 0.890706  |
| H | 5.763221 | 2.125307  | 2.220851  |
| H | 4.307303 | 0.180985  | 2.955598  |
| H | 3.595060 | 1.739372  | 3.334627  |
| H | 2.914858 | -0.040163 | 0.934415  |
| H | 1.868652 | 0.265356  | 2.312965  |
| N | 3.121510 | 2.550556  | 0.109266  |
| H | 1.298254 | 1.567680  | 0.236351  |
| H | 5.039748 | 3.388216  | 0.189932  |

(R)-1d-(R)-2a TS2, :N eq

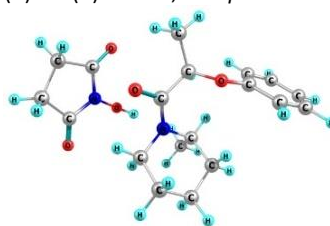

$E_{FSP} = -1225.11363032$   $E_{t_{293}} = -1224.660532$ ,

$H_{293} = -1224.659604$   $G_{293} = -1224.732443$

$E_{t_{253}} = -1224.666083$ ,

$H_{253} = -1224.664207$   $G_{253} = -1224.723349$

Imaginary frequency = 0

|   |          |           |           |
|---|----------|-----------|-----------|
| C | 2.194582 | 3.801230  | -0.622563 |
| O | 1.066748 | 3.630977  | -1.011470 |
| H | 2.901974 | 1.833228  | -1.006671 |
| O | 3.983757 | 3.325699  | -2.597144 |
| N | 3.675572 | 2.340868  | -3.402129 |
| C | 3.095332 | 1.204834  | -3.010361 |
| O | 2.757525 | 0.967321  | -1.809039 |
| C | 2.907592 | 0.254993  | -4.145597 |
| H | 3.467683 | -0.662191 | -3.948953 |
| H | 1.853475 | -0.016625 | -4.234554 |
| C | 3.935423 | 2.340242  | -4.799553 |
| O | 4.466574 | 3.260958  | -5.369869 |
| C | 3.437348 | 1.031370  | -5.360520 |
| H | 2.660696 | 1.233168  | -6.100365 |
| H | 4.256821 | 0.525061  | -5.872061 |
| C | 2.889011 | 5.165739  | -0.698610 |
| H | 3.937344 | 5.032065  | -0.951186 |
| C | 2.214523 | 6.082427  | -1.696530 |
| H | 2.356232 | 5.677595  | -2.699704 |
| H | 1.147443 | 6.160803  | -1.486725 |
| H | 2.658327 | 7.077129  | -1.654920 |
| O | 2.765197 | 5.645950  | 0.653004  |
| C | 3.659797 | 6.558690  | 1.141254  |
| C | 4.663089 | 7.171380  | 0.391546  |
| H | 4.795323 | 6.953349  | -0.658434 |
| C | 5.509897 | 8.093188  | 1.007087  |
| H | 6.282427 | 8.569667  | 0.415611  |
| C | 5.365935 | 8.411015  | 2.351730  |
| H | 6.026159 | 9.130695  | 2.818727  |
| C | 3.509782 | 6.871900  | 2.494455  |
| H | 2.726016 | 6.383228  | 3.059650  |
| C | 4.357379 | 7.793257  | 3.091352  |
| H | 4.225057 | 8.033515  | 4.139760  |
| C | 2.002665 | 2.002197  | 1.048281  |
| C | 1.669240 | 2.918032  | 2.223610  |
| H | 1.011346 | 2.379361  | 2.908670  |
| H | 2.556297 | 3.224220  | 2.778951  |
| H | 1.151140 | 3.817685  | 1.891717  |
| C | 4.281043 | 2.921329  | 0.473287  |
| H | 4.294995 | 3.632989  | 1.300197  |
| C | 4.925115 | 1.604635  | 0.888445  |
| C | 4.109503 | 0.893462  | 1.965748  |
| C | 2.672764 | 0.694056  | 1.478987  |
| H | 5.024727 | 0.957464  | 0.011290  |
| H | 5.934988 | 1.826078  | 1.243299  |
| H | 4.556889 | -0.073759 | 2.207522  |
| H | 4.125531 | 1.485747  | 2.886086  |
| H | 2.669343 | -0.002125 | 0.635842  |
| H | 2.053992 | 0.245133  | 2.259551  |
| N | 2.877497 | 2.698272  | 0.018495  |
| H | 1.083958 | 1.764960  | 0.514569  |
| H | 4.823083 | 3.343409  | -0.367045 |

(R)-1d-(R)-2a PC, :N eq

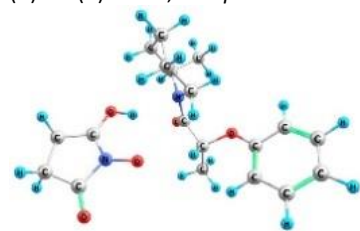

$E_{FSP} = -1225.12082053$   $E_{t_{293}} = -1224.663241$ ,

$H_{293} = -1224.662313$   $G_{293} = -1224.737256$

$E_{t_{253}} = -1224.668836$ ,

$H_{253} = -1224.668031$   $G_{253} = -1224.727992$

Imaginary frequency = 0

|   |          |           |           |
|---|----------|-----------|-----------|
| C | 1.830953 | 3.894061  | -0.163011 |
| O | 0.653131 | 3.735473  | -0.464735 |
| H | 2.748748 | 1.957575  | -1.489933 |
| O | 3.892935 | 3.439448  | -2.647243 |
| N | 3.842305 | 2.427179  | -3.461224 |
| C | 3.221477 | 1.300681  | -3.181480 |
| O | 2.618592 | 1.142773  | -2.039023 |
| C | 3.291110 | 0.285220  | -4.254314 |
| H | 3.759544 | -0.627548 | -3.878653 |
| H | 2.287647 | 0.023966  | -4.598430 |
| C | 4.419580 | 2.371453  | -4.781807 |
| O | 5.002440 | 3.296828  | -5.273704 |
| C | 4.129261 | 0.996381  | -5.333248 |
| H | 3.599990 | 1.094241  | -6.281509 |
| H | 5.075443 | 0.489168  | -5.529765 |
| C | 2.533915 | 5.231508  | -0.455558 |
| H | 3.482261 | 5.035354  | -0.956096 |
| C | 1.671080 | 6.143103  | -1.304538 |
| H | 1.446314 | 5.654800  | -2.254133 |
| H | 0.732007 | 6.363943  | -0.796919 |
| H | 2.192228 | 7.078028  | -1.511780 |
| O | 2.769745 | 5.781233  | 0.855397  |
| C | 3.798109 | 6.653994  | 1.066183  |
| C | 4.567940 | 7.233460  | 0.057864  |
| H | 4.389229 | 7.010642  | -0.983718 |
| C | 5.581041 | 8.129097  | 0.399551  |
| H | 6.170650 | 8.577580  | -0.390917 |
| C | 5.835951 | 8.451316  | 1.726254  |
| H | 6.622909 | 9.150181  | 1.979812  |
| C | 4.055653 | 6.966616  | 2.404510  |
| H | 3.450607 | 6.500460  | 3.172918  |
| C | 5.066267 | 7.861068  | 2.728648  |
| H | 5.258198 | 8.098573  | 3.768749  |
| C | 1.780286 | 1.871498  | 1.187053  |
| C | 1.339407 | 2.393693  | 2.559256  |
| H | 0.706581 | 1.650898  | 3.049929  |
| H | 2.188993 | 2.601617  | 3.212230  |
| H | 0.760438 | 3.313181  | 2.451511  |
| C | 3.939924 | 3.130789  | 0.925808  |
| H | 3.932476 | 3.586202  | 1.920855  |
| C | 4.721320 | 1.822473  | 0.956517  |
| C | 4.003698 | 0.755822  | 1.779063  |
| C | 2.574344 | 0.564840  | 1.270667  |
| H | 4.869674 | 1.464576  | -0.067904 |
| H | 5.710156 | 2.033644  | 1.372581  |
| H | 4.542096 | -0.193349 | 1.719009  |
| H | 3.996602 | 1.052553  | 2.833372  |
| H | 2.607199 | 0.108778  | 0.277926  |
| H | 2.022288 | -0.124012 | 1.915481  |
| N | 2.556868 | 2.917104  | 0.464319  |
| H | 0.890542 | 1.693997  | 0.586717  |
| H | 4.434003 | 3.823710  | 0.252182  |

(R)-1d-(S)-2a PC, :N eq

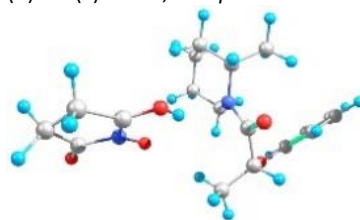

$E_{FSP} = -1225.11444827$   $E_{t_{293}} = -1224.661100$ ,

$H_{293} = -1224.660173$   $G_{293} = -1224.732573$

$E_{t_{253}} = -1224.666677$

$H_{253} = -1224.66576$   $G_{253} = -1224.723532$

Imaginary frequency = 0

|   |           |           |           |
|---|-----------|-----------|-----------|
| C | 3.339450  | 2.551386  | -1.536233 |
| H | 2.036202  | 0.368796  | -1.257375 |
| O | 4.085837  | 2.144059  | -2.418809 |
| C | 2.425354  | 3.767979  | -1.896811 |
| H | 2.932803  | 4.203200  | -2.780623 |
| C | 1.014530  | 3.326935  | -2.308441 |
| H | 1.082489  | 2.647653  | -3.176712 |
| H | 0.478451  | 2.791629  | -1.505586 |
| H | 0.423762  | 4.210333  | -2.609498 |
| O | 2.291971  | 4.775347  | -0.891538 |
| C | 3.391118  | 5.441653  | -0.423940 |
| C | 4.702710  | 5.254616  | -0.898814 |
| H | 4.922032  | 4.562872  | -1.717032 |
| C | 5.758837  | 5.964616  | -0.304965 |
| H | 6.777789  | 5.797600  | -0.676901 |
| C | 5.528139  | 6.867752  | 0.737457  |
| H | 6.360357  | 7.414521  | 1.195896  |
| C | 3.152387  | 6.363539  | 0.616346  |
| H | 2.124457  | 6.507194  | 0.969344  |
| C | 4.213544  | 7.066825  | 1.189750  |
| H | 4.010981  | 7.774537  | 2.003466  |
| C | 2.520419  | 2.487952  | 0.859316  |
| C | 4.405928  | 1.014635  | 0.042357  |
| C | 3.966183  | -0.056156 | 1.065332  |
| C | 3.261136  | 0.529275  | 2.298227  |
| C | 2.079911  | 1.397226  | 1.845533  |
| H | 3.157837  | 3.231071  | 1.382913  |
| H | 3.281539  | -0.764327 | 0.561436  |
| H | 4.857196  | -0.643285 | 1.360244  |
| H | 2.913958  | -0.287152 | 2.960241  |
| H | 3.973773  | 1.130683  | 2.898781  |
| H | 1.305220  | 0.774912  | 1.359376  |
| H | 1.595124  | 1.892984  | 2.708637  |
| N | 3.261217  | 1.924214  | -0.298200 |
| H | 1.637611  | 3.027379  | 0.493331  |
| H | 4.671975  | 0.504435  | -0.897425 |
| C | 5.644231  | 1.814812  | 0.495714  |
| H | 6.483367  | 1.123482  | 0.696384  |
| H | 5.968795  | 2.513233  | -0.293122 |
| H | 5.466957  | 2.401208  | 1.415140  |
| O | -0.135053 | 0.518541  | -0.525776 |
| N | -0.097511 | -0.626712 | -1.096853 |
| C | 0.968205  | -1.140156 | -1.700724 |
| O | 2.102980  | -0.485172 | -1.767751 |
| C | -1.229935 | -1.563265 | -1.175051 |
| O | -2.310513 | -1.325987 | -0.723827 |
| C | 0.762566  | -2.514841 | -2.248867 |
| H | 0.979943  | -2.549686 | -3.334732 |
| H | 1.461571  | -3.228600 | -1.770127 |
| C | -0.719975 | -2.801586 | -1.909468 |
| H | -1.341521 | -2.975996 | -2.806594 |
| H | -0.851594 | -3.684901 | -1.258237 |

## References

- S1 S. A. Vakarov, D. A. Gruzdev, L. Sh. Sadretdinova, E. N. Chulakov, M. G. Pervova, M. A. Ezhikova, M. I. Kodess, G. L. Levit, V. P. Krasnov, *Tetrahedron: Asymmetry*, 2015, **26**, 312.
- S2 (a) K. Maruoka, S. Nakai, H. Yamamoto, *Org. Synth.*, 1988, **66**, 185. (b) S. Guizzetti, A. Michaut, G. Federspiel, J. Eymard, I. Caron, S. Quatrevaux, E. Daras, S. Jolly, J. Guillemont, D. Lançois, *Org. Process Res. Dev.*, 2020, **24**, 729.
- S3 V. P. Krasnov, V. V. Zarubaev, D. A. Gruzdev, O. A. Vozdvizhenskaya, S. A. Vakarov, V. V. Musiyak, E. N. Chulakov, A. S. Volobueva, E. O. Sinegubova, M. A. Ezhikova, M. I. Kodess, G. L. Levit, V. N. Charushin, *Chem. Heterocycl. Compd.*, 2021, **57**, 498.
- S4 A. G. Al-Sehemi, R. S. Atkinson, J. Fawcett, *J. Chem. Soc., Perkin Trans. 1*, 2002, 257.
- S5 A. Thurkauf, P. Hillery, A. E. Jacobson, K. C. Rice, *J. Org. Chem.*, 1987, **52**, 5466.
- S6 W. H. N. Nijhuis, W. A. Verboom, A. A. El-Fadl, G. J. van Hummel, D. N. Reinhoudt, *J. Org. Chem.*, 1989, **54**, 209.
- S7 S.-Y. Hsieh, M. Binanzer, I. Kreituss, J. W. Bode, *Chem. Commun.*, 2012, **48**, 8892.
- S8 M. Binanzer, S.-Y. Hsieh, J. W. Bode, *J. Am. Chem. Soc.*, 2011, **133**, 19698.
- S9 M. R. Maddani, J.-C. Fiaud, H. B. Kagan, In *Separation of Enantiomers: Synthetic Methods* (Ed.: M. Todd), Wiley-VCH, Weinheim, 2014, pp. 13-74.
- S10 (a) A. Pedretti, L. Villa, G. Vistoli, *J. Mol. Graph.*, 2002, **21**, 47. (b) A. Pedretti, L. Villa, G. Vistoli, *J. Comput.-Aided Mol. Des.*, 2004, **18**, 167.
- S11 (a) F. Neese, *Wiley Interdiscip. Rev.: Comput. Mol. Sci.*, 2012, **2**, 73. (b) F. Neese, *Wiley Interdiscip. Rev.: Comput. Mol. Sci.*, 2018, **8**, e1327.
- S12 (a) A. Klamt, G. Schüürmann, *J. Chem. Soc., Perkin Trans. 2*, 1993, 799. (b) J. Andzelm, C. Kölmel, A. Klamt, *J. Chem. Phys.*, 1995, **103**, 9312. (c) V. Barone, M. Cossi, *J. Phys. Chem. A*, 1998, **102**, 1995. (d) M. Cossi, N. Rega, G. Scalmani, V. Barone, *J. Comput. Chem.*, 2003, **24**, 669.
- S13 (a) S. Grimme, S. Ehrlich, L. Goerigk, *J. Comput. Chem.*, 2011, **32**, 1456. (b) S. Grimme, A. Hansen, J. G. Brandenburg, C. Bannwarth, *Chem. Rev.*, 2016, **116**, 5105.
- S14 (a) A. D. Becke, *J. Chem. Phys.*, 1993, **98**, 1372. (b) A. D. Becke, *J. Chem. Phys.*, 1993, **98**, 5648.
- S15 F. Weigend, R. Ahlichs, *J. Phys. Chem. Chem. Phys.*, 2005, **7**, 3297.
- S16 H. Kruse, S. Grimme, *J. Chem. Phys.*, 2012, **126**, 154101.
- S17 F. Neese, *J. Comput. Chem.*, 2003, **24**, 1740.
- S18 A. Fernández-Ramos, B. A. Ellingson, R. Maena-Paneda, J. M. C. Marques, D. G. Truhlar, *Theor. Chem. Acc.*, 2007, **118**, 813.
- S19 G. A. Zhurko, ChemCraft; <http://www.chemcraftprog.com>.
